# Supplementary material
Source: PubMed Central journal article supplement (PMC4408965)

## Supplementary Data

### **Advanced morphological-behavioral test platform reveals neurodevelopmental defects in embryonic zebrafish exposed to comprehensive suite of halogenated and organophosphate flame retardants**

Pamela D. Noyes\*, Derik E. Haggard\*, Greg D. Gonnerman\*, Robert L. Tanguay\*†

\* Department of Environmental & Molecular Toxicology, Environmental Health Sciences Center, Oregon State University, Corvallis, OR 97331

† Corresponding author: Phone: 541-737-6514; Email: robert.tanguay@oregonstate.edu.

**1. Sample Sizes**  
**Embryonic Photomotor Responses at 24 hpf**

| Abbr                            | Chemical                                      | Sample size by test concentration (µM) |              |              |              |              |       |      |     |    |
|---------------------------------|-----------------------------------------------|----------------------------------------|--------------|--------------|--------------|--------------|-------|------|-----|----|
|                                 |                                               | 0                                      | 6.40<br>E-06 | 6.40<br>E-05 | 6.40<br>E-04 | 6.40<br>E-03 | 0.064 | 0.64 | 6.4 | 64 |
| Chlorinated Phosphate Ester FRs |                                               |                                        |              |              |              |              |       |      |     |    |
| BDP                             | bisphenol A bis-(diphenyl phosphate)          | 31                                     |              |              | 29           | 30           | 28    | 30   | 31  |    |
| BDPD                            | <i>t</i> -Butylphenyl diphenyl phosphate      | 31                                     |              |              |              | 29           | 30    | 28   | 29  | 21 |
| EHDP                            | 2-Ethylhexyl diphenyl phosphate               | 29                                     |              |              |              | 27           | 28    | 32   | 30  | 26 |
| IDDP                            | Isodecyl diphenyl phosphate                   | 30                                     |              |              |              | 32           | 28    | 29   | 29  | 23 |
| IPP-1                           | Isopropylated triphenyl phosphate - 1         | 31                                     |              |              |              | 31           | 31    | 32   | 31  | 26 |
| IPP-2                           | Isopropylated triphenyl phosphate - 2         | 31                                     |              |              |              | 28           | 30    | 29   | 28  | 29 |
| IPP-3                           | Isopropylated triphenyl phosphate - 3         | 30                                     |              |              |              | 32           | 27    | 30   | 27  | 17 |
| mITP                            | Mono isopropylated triaryl phosphate          | 31                                     |              | 32           | 32           | 30           | 30    | 29   |     |    |
| RDP                             | Resorcinol A bis-(diphenyl phosphate)         | 30                                     |              |              | 29           | 31           | 32    | 27   | 29  |    |
| TBP                             | Tributyl phosphate                            | 30                                     |              |              | 27           | 30           | 28    | 31   | 31  |    |
| TBEP                            | Tris (2-butoxyethyl) phosphate                | 32                                     |              |              | 32           | 32           | 31    | 30   | 32  |    |
| TCP                             | Tricresyl phosphate                           | 28                                     |              |              |              | 24           | 25    | 24   | 27  | 17 |
| o-TCP                           | Tri- <i>o</i> -cresyl phosphate               | 31                                     |              |              |              | 29           | 30    | 30   | 30  | 29 |
| TEHP                            | Tris (2-ethylhexyl) phosphate                 | 31                                     |              |              | 32           | 31           | 31    | 30   | 31  |    |
| TPP                             | Triphenyl phosphate                           | 32                                     |              |              |              | 28           | 28    | 26   | 30  | 29 |
| DPP*                            | Diphenyl phosphate                            | 31                                     |              |              | 31           | 30           | 32    | 31   | 32  |    |
| Chlorinated Phosphate Ester FRs |                                               |                                        |              |              |              |              |       |      |     |    |
| BCPCP*                          | Bis (2-chloropropyl) 1-carboxyethyl phosphate | 31                                     |              |              |              | 32           | 28    | 30   | 29  | 30 |
| BCPP*                           | Bis(1,3-dichloro-2-propyl)phosphate           | 32                                     |              |              |              | 32           | 30    | 31   | 31  | 31 |
| BDCPP*                          | Bis (2-chloropropyl) phosphate                | 32                                     |              |              |              | 24           | 30    | 26   | 30  | 29 |
| Dechlorane                      | Dechlorane Plus                               | 30                                     |              |              | 29           | 27           | 29    | 30   | 31  |    |
| MCPP*                           | Mono (2-chloropropyl) phosphate               | 31                                     |              |              |              | 31           | 31    | 30   | 31  | 32 |
| TCEP                            | Tris (1-chloropropyl) phosphate               | 31                                     |              |              |              | 31           | 32    | 29   | 31  | 31 |
| TCPP                            | Tris (2-chloroethyl) phosphate                | 30                                     |              |              |              | 32           | 30    | 32   | 31  | 29 |
| TDCPP                           | Tris (1,3-dichloro-2-propyl) phosphate        | 28                                     |              |              |              | 31           | 30    | 31   | 31  | 16 |
| PBDE FRs                        |                                               |                                        |              |              |              |              |       |      |     |    |
| DE-71                           | PentaBDE commercial mixture                   | 29                                     |              |              |              | 31           | 24    | 29   | 28  | 26 |
| DE-79                           | OctaBDE commercial mixture                    | 30                                     |              |              |              | 30           | 30    | 29   | 31  | 30 |
| BDE-3                           | <i>p</i> -Bromodiphenyl ether                 | 30                                     |              |              |              | 31           | 30    | 30   | 32  | 30 |
| BDE-15                          | <i>p,p</i> -Dibromodiphenyl ether             | 28                                     |              |              |              | 30           | 29    | 25   | 29  | 29 |
| BDE-47                          | 2,2',4,4'-Tetrabromodiphenyl ether            | 31                                     |              |              |              | 28           | 26    | 28   | 28  | 28 |
| BDE-99                          | 2,2',4,4',5-Pentabromodiphenyl ether          | 30                                     |              |              |              | 30           | 30    | 30   | 28  | 31 |
| BDE-100                         | 2,2',4,4',6-Pentabromodiphenyl ether          | 29                                     | 26           | 30           | 29           | 32           |       |      |     |    |
| BDE-153                         | 2,2',4,4',5,5'-Hexabromodiphenyl ether        | 31                                     |              |              |              | 29           | 32    | 30   | 30  | 30 |
| BDE-154                         | 2,2',4,4',5,6'-Hexabromodiphenyl ether        | 30                                     | 31           | 30           | 31           | 30           |       |      |     |    |
| BDE-183                         | 2,2',3,4,4',5',6-Heptabromodiphenyl ether     | 31                                     | 32           | 31           | 29           | 31           |       |      |     |    |
| BDE-209                         | Decabromodiphenyl ether                       | 32                                     |              |              |              | 32           | 32    | 30   | 32  | 31 |
| 2,4,6-TBP*                      | 2,4,6-Tribromophenol                          | 30                                     |              |              | 29           | 32           | 30    | 30   | 30  |    |
| 3-OH-BDE-47*                    | 3-Hydroxy-2,2',4,4'-tetraBDE                  | 30                                     |              | 32           | 29           | 32           | 30    | 30   |     |    |
| 5-OH-BDE-47*                    | 5-Hydroxy-2,2',4,4'-tetraBDE                  | 31                                     |              | 29           | 27           | 31           | 30    | 31   |     |    |
| 6-OH-BDE-47*                    | 6-Hydroxy-2,2',4,4'-tetraBDE                  | 31                                     | 28           | 28           | 29           | 28           | 30    |      |     |    |
| Other Brominated FRs            |                                               |                                        |              |              |              |              |       |      |     |    |
| HBCD                            | Hexabromocyclododecane (Commercial Mix)       | 30                                     |              |              | 31           | 30           | 30    | 31   | 29  |    |
| TBB                             | 2-ethylhexyl-tetrabromobenzoate               | 31                                     |              |              | 30           | 32           | 32    | 31   | 32  |    |
| TBBPA                           | 3,3',5,5'-Tetrabromobisphenol A               | 31                                     |              |              |              | 32           | 32    | 31   | 24  | #  |
| TBBPA-DBPE                      | TBBPA-2,3-dibromopropyl ether                 | 31                                     |              |              | 30           | 31           | 30    | 32   | 31  |    |
| TBPH                            | Bis(2-ethylhexyl)-tetrabromophthalate         | 32                                     |              | 32           | 29           | 30           | 32    | 31   |     |    |

\*Sample sizes in the 24 hpf PMR assay reflect those embryos that survived with no malformations at 24 hpf.  
# indicates 100% mortality and/or morbidity.

2. **Sample Size**  
**Larval Photomotor Response Assay at 120 hpf\***

| Abbr                            | Chemical                                      | Sample size by test concentration (µM) |              |              |              |              |       |      |     |    |
|---------------------------------|-----------------------------------------------|----------------------------------------|--------------|--------------|--------------|--------------|-------|------|-----|----|
|                                 |                                               | 0                                      | 6.40<br>E-06 | 6.40<br>E-05 | 6.40<br>E-04 | 6.40<br>E-03 | 0.064 | 0.64 | 6.4 | 64 |
| Chlorinated Phosphate Ester FRs |                                               |                                        |              |              |              |              |       |      |     |    |
| BDP                             | bisphenol A bis-(diphenyl phosphate)          | 31                                     |              |              | 26           | 26           | 24    | 27   | 25  |    |
| BPDP                            | <i>t</i> -Butylphenyl diphenyl phosphate      | 31                                     |              |              |              | 28           | 26    | 28   | 29  | #  |
| EHDP                            | 2-Ethylhexyl diphenyl phosphate               | 28                                     |              |              |              | 26           | 28    | 32   | 30  | 19 |
| IDDP                            | Isodecyl diphenyl phosphate                   | 30                                     |              |              |              | 27           | 27    | 29   | 28  | 23 |
| IPP-1                           | Isopropylated triphenyl phosphate - 1         | 29                                     |              |              |              | 31           | 28    | 32   | 28  | #  |
| IPP-2                           | Isopropylated triphenyl phosphate - 2         | 28                                     |              |              |              | 26           | 27    | 25   | 24  | 6  |
| IPP-3                           | Isopropylated triphenyl phosphate - 3         | 29                                     |              |              |              | 30           | 27    | 26   | 25  | #  |
| mITP                            | Mono isopropylated triaryl phosphate          | 31                                     |              | 30           | 30           | 28           | 27    | 3    |     |    |
| RDP                             | Resorcinol A bis-(diphenyl phosphate)         | 30                                     |              |              |              | 29           | 30    | 32   | 27  | 27 |
| TBP                             | Tributyl phosphate                            | 28                                     |              |              |              | 24           | 23    | 22   | 29  | 28 |
| TBEP                            | Tris (2-butoxyethyl) phosphate                | 30                                     |              |              |              | 30           | 29    | 28   | 28  |    |
| TCP                             | Tricresyl phosphate                           | 28                                     |              |              |              |              | 23    | 24   | 24  | 24 |
| o-TCP                           | Tri- <i>o</i> -cresyl phosphate               | 28                                     |              |              |              |              | 24    | 28   | 27  | 28 |
| TEHP                            | Tris (2-ethylhexyl) phosphate                 | 29                                     |              |              |              | 28           | 28    | 30   | 24  | 24 |
| TPP                             | Triphenyl phosphate                           | 27                                     |              |              |              |              | 23    | 23   | 24  | 27 |
| DPP*                            | Diphenyl phosphate                            | 30                                     |              |              |              | 30           | 29    | 30   | 30  | 32 |
| Chlorinated Phosphate Ester FRs |                                               |                                        |              |              |              |              |       |      |     |    |
| BCPCP*                          | Bis (2-chloropropyl) 1-carboxyethyl phosphate | 30                                     |              |              |              |              | 32    | 28   | 29  | 28 |
| BCPP*                           | Bis(1,3-dichloro-2-propyl)phosphate           | 30                                     |              |              |              |              | 30    | 27   | 31  | 30 |
| BDCPP*                          | Bis (2-chloropropyl) phosphate                | 31                                     |              |              |              |              | 22    | 27   | 23  | 28 |
| Dechlorane                      | Dechlorane Plus                               | 30                                     |              |              |              | 29           | 26    | 28   | 28  | 30 |
| MCPP*                           | Mono (2-chloropropyl) phosphate               | 31                                     |              |              |              |              | 30    | 31   | 29  | 28 |
| TCEP                            | Tris (1-chloropropyl) phosphate               | 31                                     |              |              |              |              | 26    | 30   | 26  | 31 |
| TCPP                            | Tris (2-chloroethyl) phosphate                | 29                                     |              |              |              |              | 32    | 28   | 30  | 30 |
| TDCPP                           | Tris (1,3-dichloro-2-propyl) phosphate        | 28                                     |              |              |              |              | 31    | 29   | 30  | 27 |
| PBDE FRs                        |                                               |                                        |              |              |              |              |       |      |     |    |
| DE-71                           | PentaBDE commercial mixture                   | 27                                     |              |              |              |              | 31    | 23   | 28  | 28 |
| DE-79                           | OctaBDE commercial mixture                    | 30                                     |              |              |              |              | 29    | 29   | 29  | 31 |
| BDE-3                           | <i>p</i> -Bromodiphenyl ether                 | 30                                     |              |              |              |              | 29    | 29   | 29  | 30 |
| BDE-15                          | <i>p,p</i> -Dibromodiphenyl ether             | 28                                     |              |              |              |              | 30    | 28   | 24  | 28 |
| BDE-47                          | 2,2',4,4'-Tetrabromodiphenyl ether            | 29                                     |              |              |              |              | 22    | 24   | 23  | 26 |
| BDE-99                          | 2,2',4,4',5-Pentabromodiphenyl ether          | 30                                     |              |              |              |              | 29    | 25   | 25  | 25 |
| BDE-100                         | 2,2',4,4',6-Pentabromodiphenyl ether          | 29                                     | 28           | 25           | 30           | 27           |       |      |     |    |
| BDE-153                         | 2,2',4,4',5,5'-Hexabromodiphenyl ether        | 31                                     |              |              |              |              | 25    | 31   | 27  | 30 |
| BDE-154                         | 2,2',4,4',5,6'-Hexabromodiphenyl ether        | 31                                     | 30           | 29           | 28           | 28           |       |      |     |    |
| BDE-183                         | 2,2',3,4,4',5',6-Heptabromodiphenyl ether     | 31                                     | 28           | 29           | 28           | 30           |       |      |     |    |
| BDE-209                         | Decabromodiphenyl ether                       | 32                                     |              |              |              |              | 32    | 32   | 30  | 32 |
| 2,4,6-TBP*                      | 2,4,6-Tribromophenol                          | 30                                     |              |              |              |              | 26    | 26   | 24  | 27 |
| 3-OH-BDE-47*                    | 3-Hydroxy-2,2',4,4'-tetraBDE                  | 29                                     |              | 31           | 29           | 31           | 29    | 29   |     |    |
| 5-OH-BDE-47*                    | 5-Hydroxy-2,2',4,4'-tetraBDE                  | 27                                     |              | 27           | 23           | 26           | 27    | 28   |     |    |
| 6-OH-BDE-47*                    | 6-Hydroxy-2,2',4,4'-tetraBDE                  | 28                                     | 24           | 26           | 27           | 25           | 25    |      |     |    |
| Other Brominated FRs            |                                               |                                        |              |              |              |              |       |      |     |    |
| HBCD                            | Hexabromocyclododecane (Commercial Mix)       | 29                                     |              |              |              | 31           | 29    | 27   | 30  | 23 |
| TBB                             | 2-ethylhexyl-tetrabromobenzoate               | 31                                     |              |              |              |              | 29    | 30   | 31  | 30 |
| TBBPA                           | 3,3',5,5'-Tetrabromobisphenol A               | 31                                     |              |              |              |              | 29    | 29   | 27  | #  |
| TBBPA-DBPE                      | TBBPA-2,3-dibromopropyl ether                 | 29                                     |              |              |              | 30           | 28    | 27   | 30  | 29 |
| TBPH                            | Bis(2-ethylhexyl)-tetrabromophthalate         | 32                                     |              | 31           | 28           | 29           | 32    | 31   |     |    |

\*Sample sizes in the 120 hpf PMR assay reflect larvae that survived with no malformations detected at either 24 hpf or 120 hpf. # indicates 100% mortality and/or morbidity.

### 3. PCA Loadings

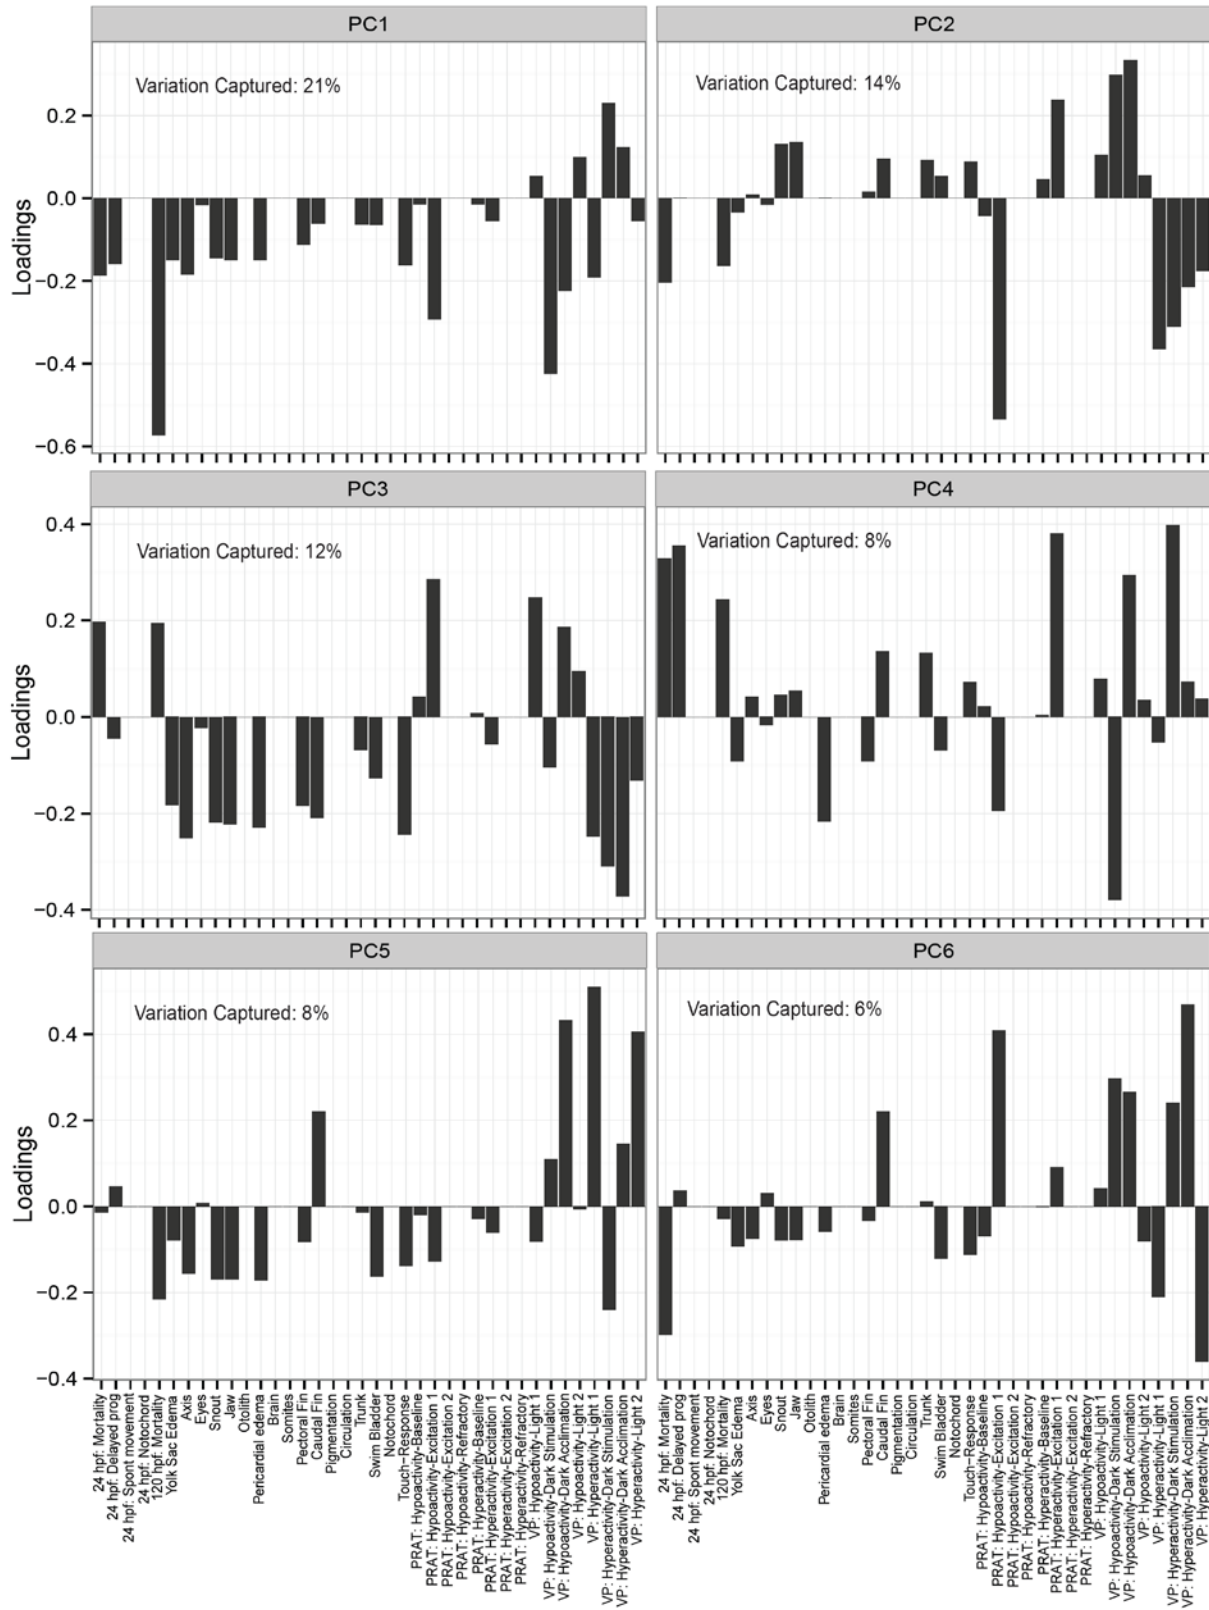

#### 4. ARYL PHOSPHATE ESTER (APE) FLAME RETARDANTS

##### Bisphenol A bis-(diphenyl phosphate) (BDP)

##### *BDP: Zebrafish Mortality and Malformations at 24 and 120 hpf*

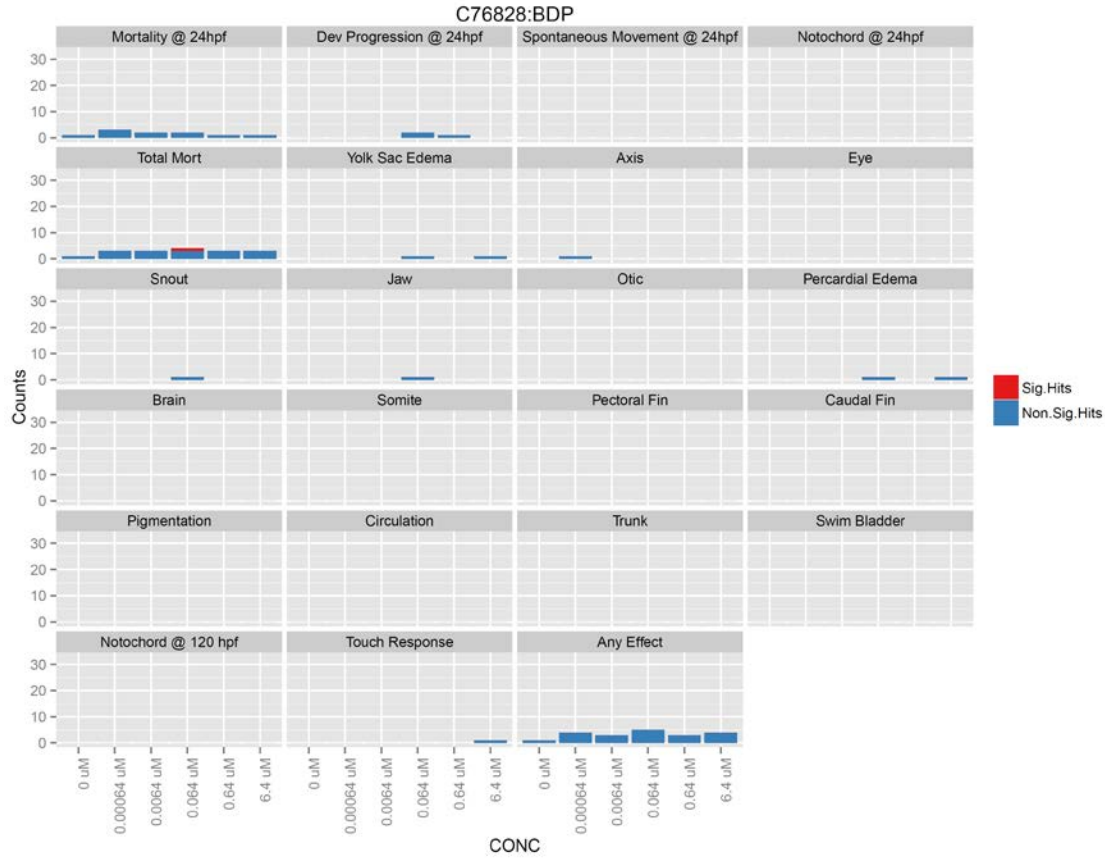

##### *BDP: Zebrafish embryo PRAT results at 24 hpf*

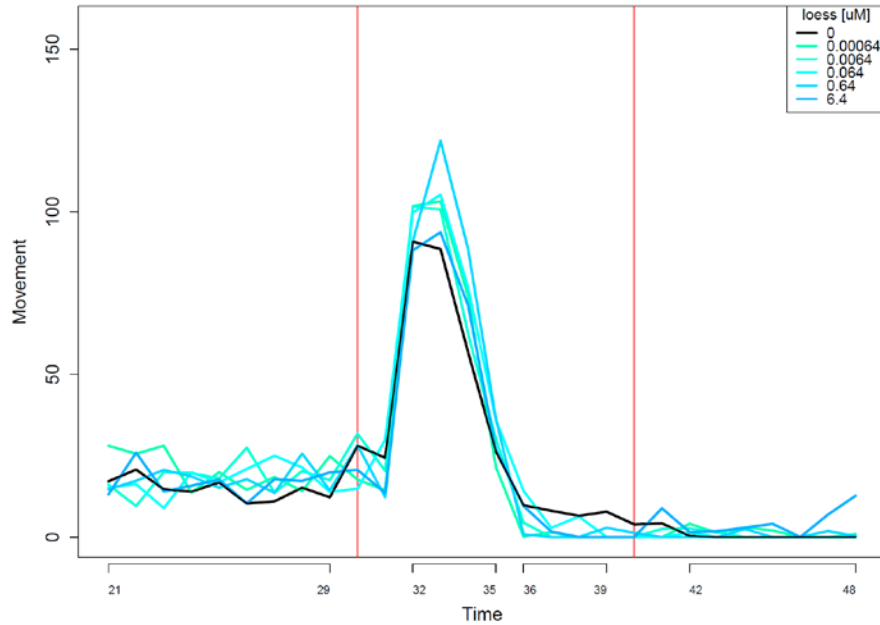

**BDP: Zebrafish larvae PMR assay results at 120 hpf**

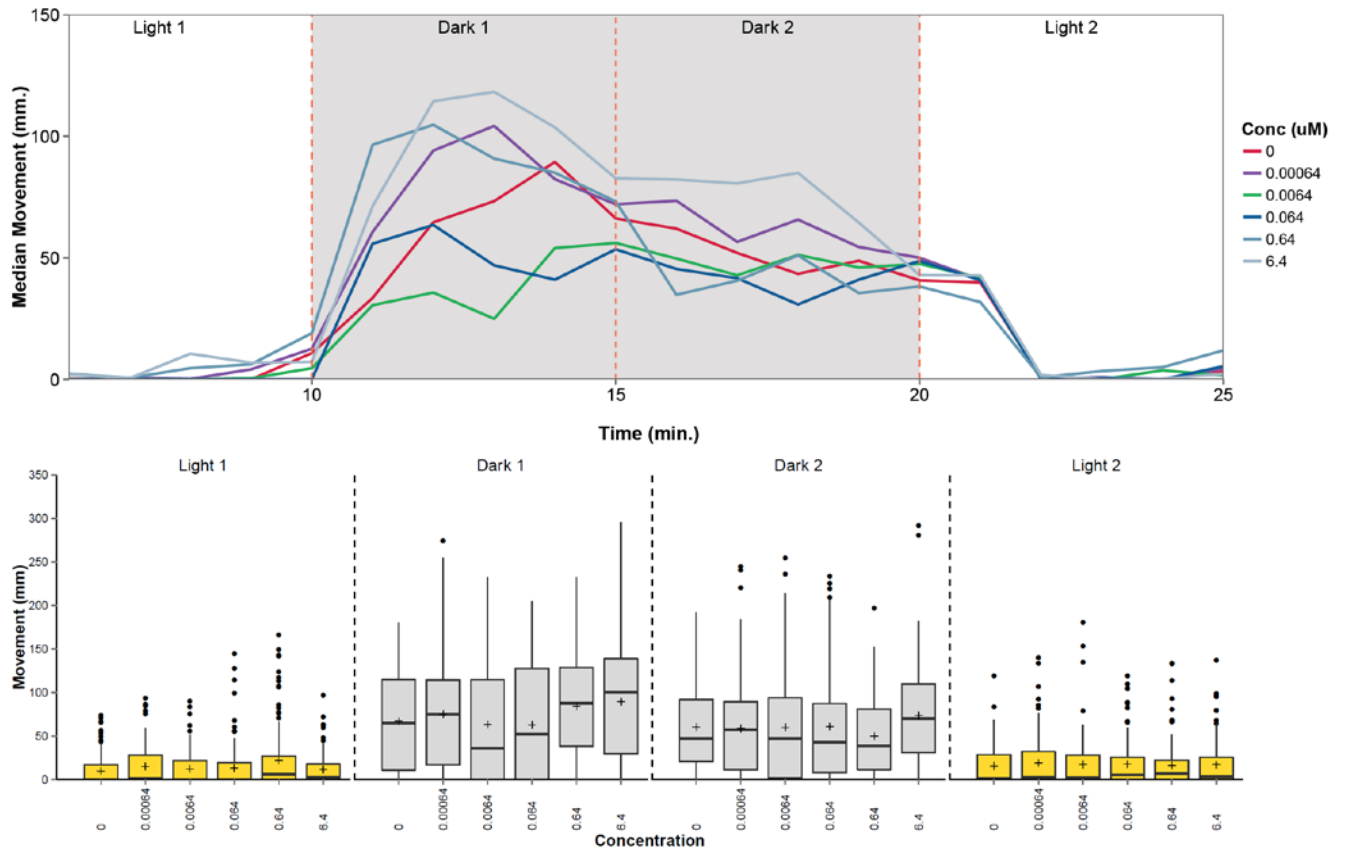

**t-Butylphenyl diphenyl phosphate (BPDP)**

***BPDP: Zebrafish Mortality and Malformations at 24 and 120 hpf***

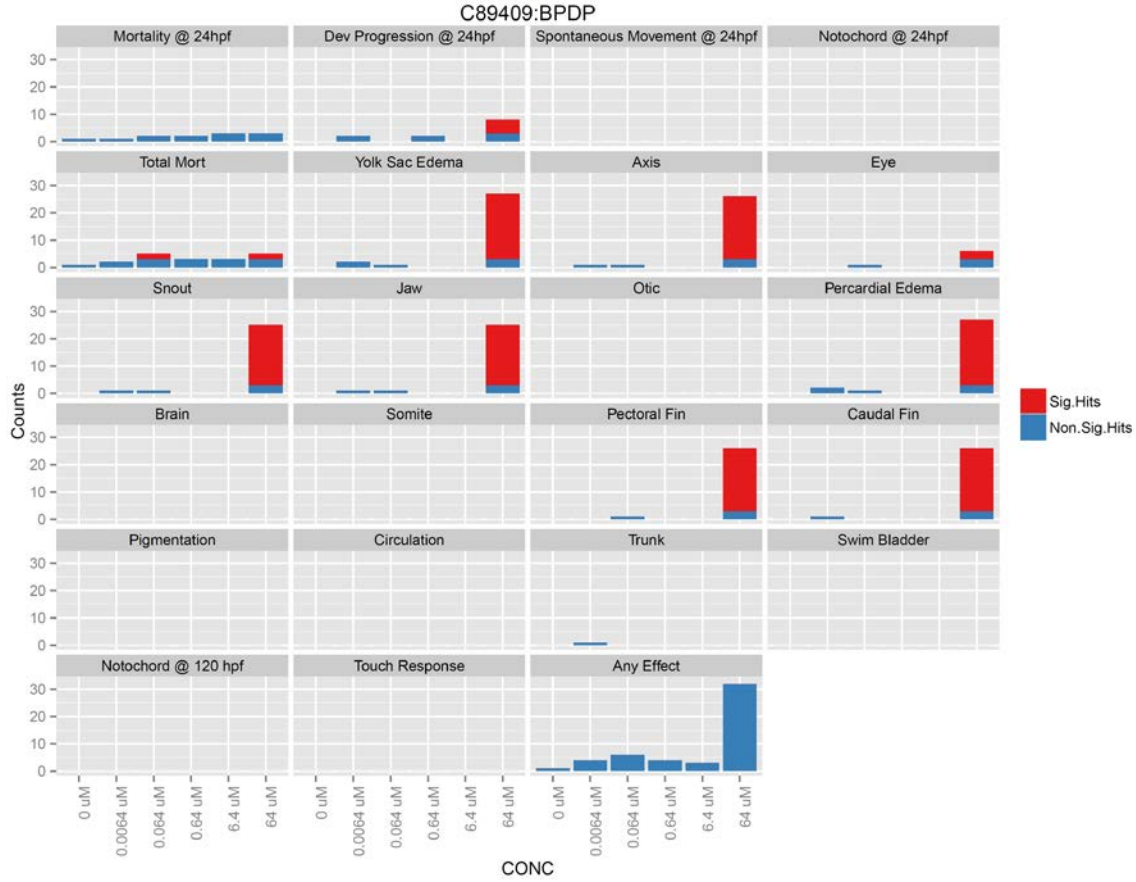

***BPDP: Zebrafish embryo PRAT results at 24 hpf***

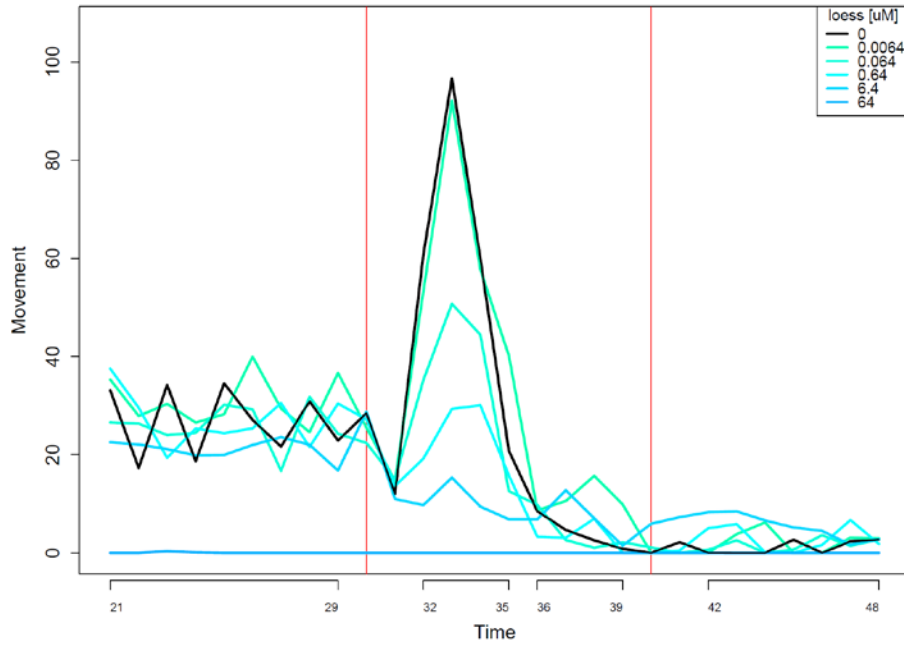

***BPDP: Zebrafish larvae PMR assay results at 120 hpf***

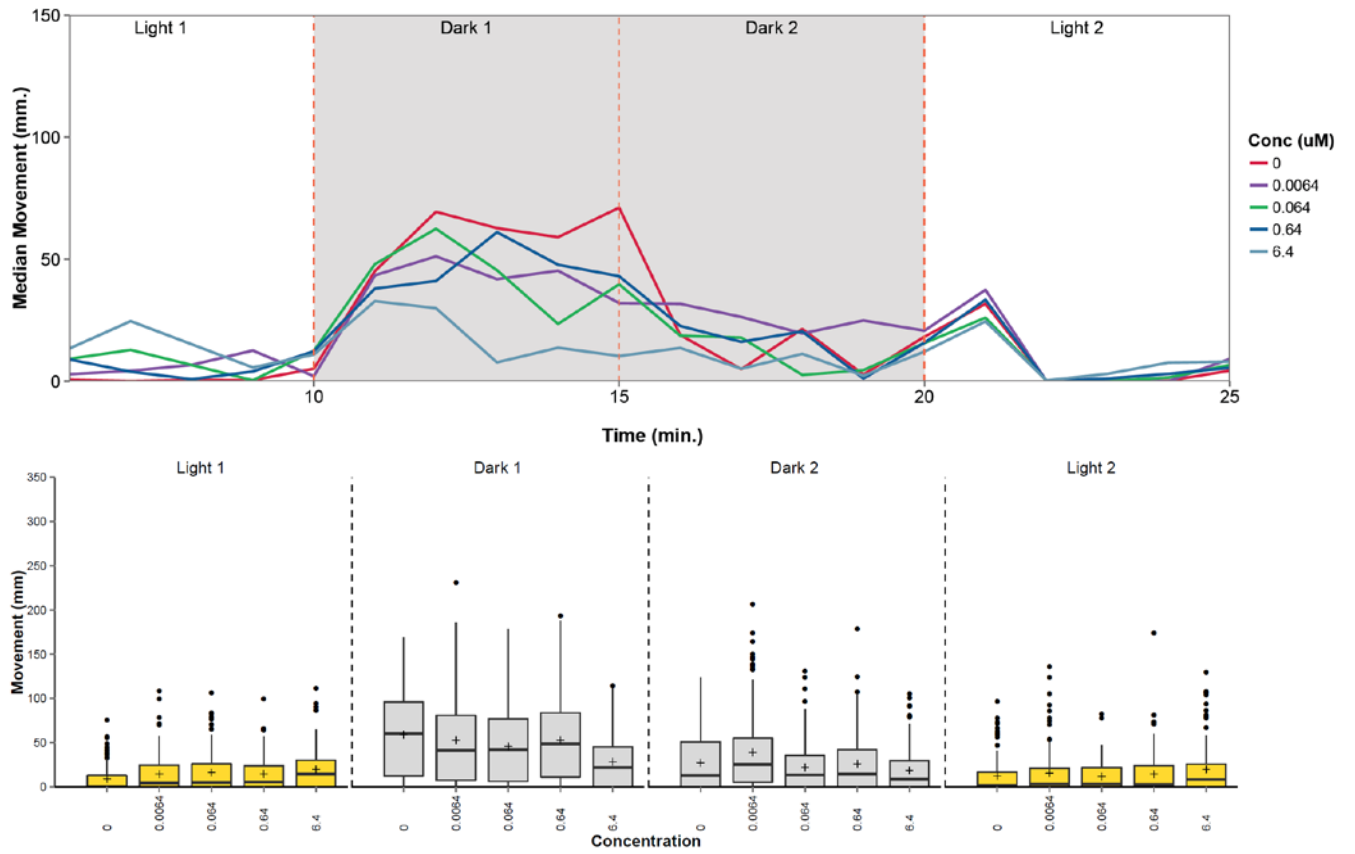



**Diphenyl phosphate (DPP)**

***DPP: Zebrafish Mortality and Malformations at 24 and 120 hpf***

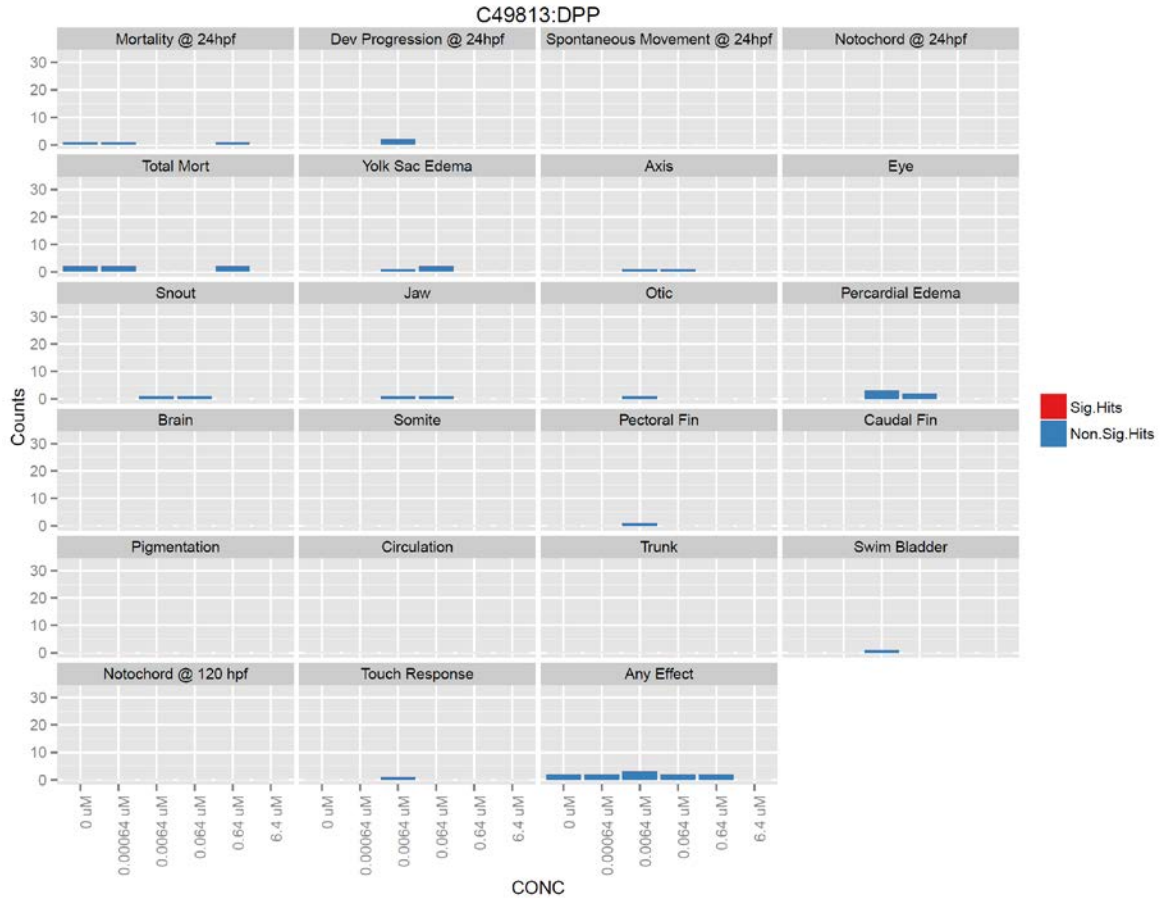

***DPP: Zebrafish embryo PRAT results at 24 hpf***

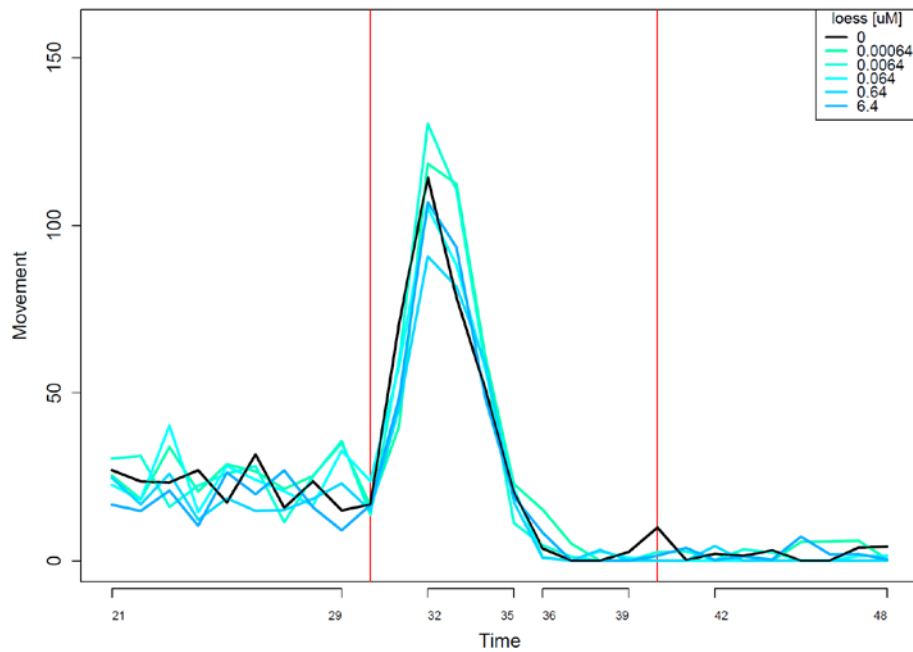

*DPP: Zebrafish larvae PMR assay results at 120 hpf*

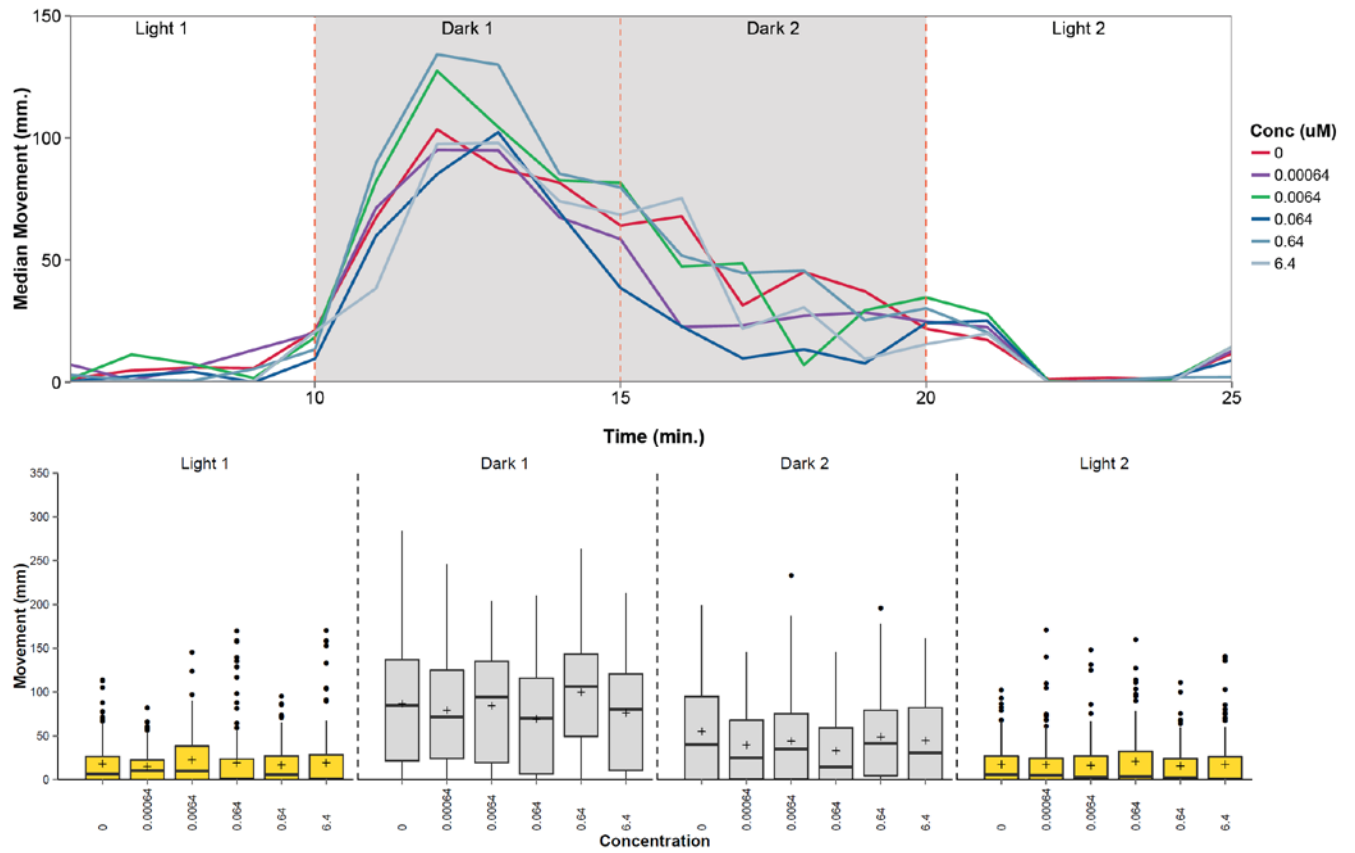

**2-Ethylhexyl diphenyl phosphate (EHDP)**

***EHDP: Zebrafish Mortality and Malformations at 24 and 120 hpf***

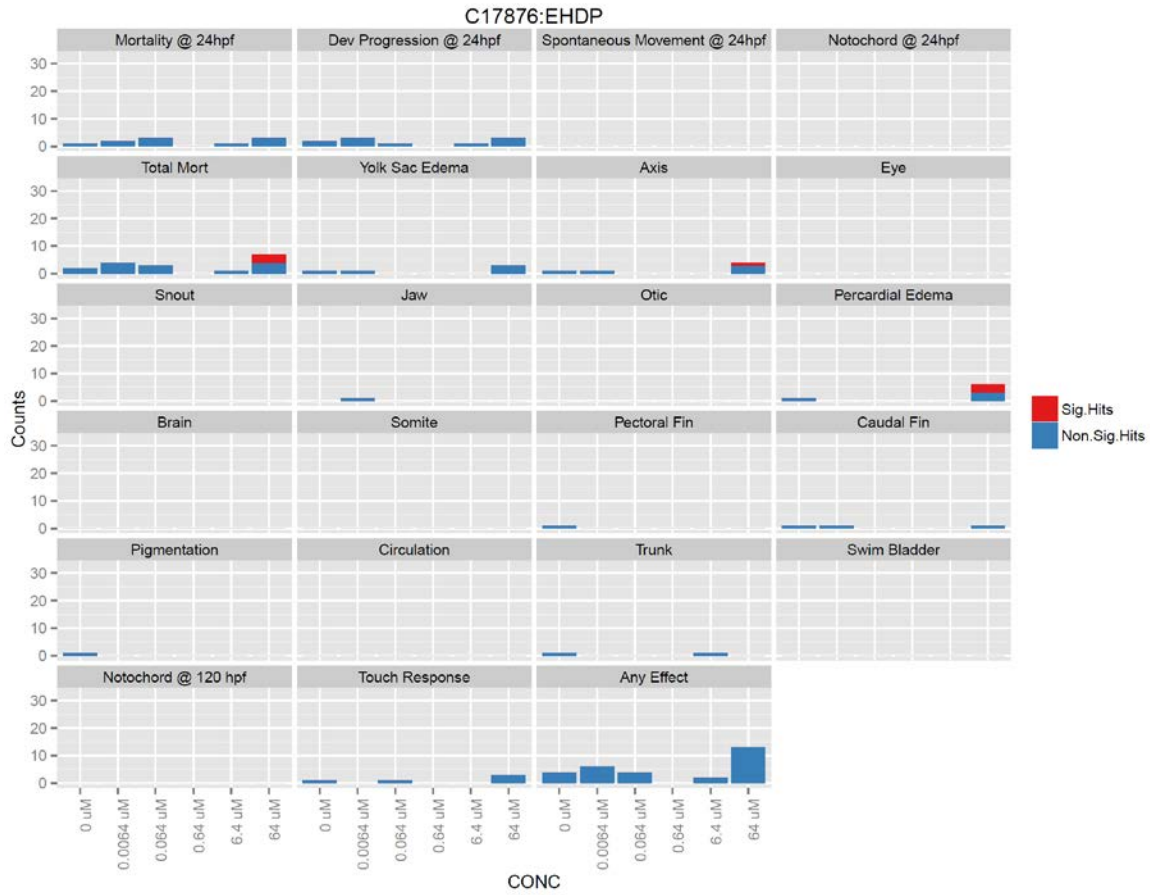

***EHDP: Zebrafish embryo PRAT results at 24 hpf***

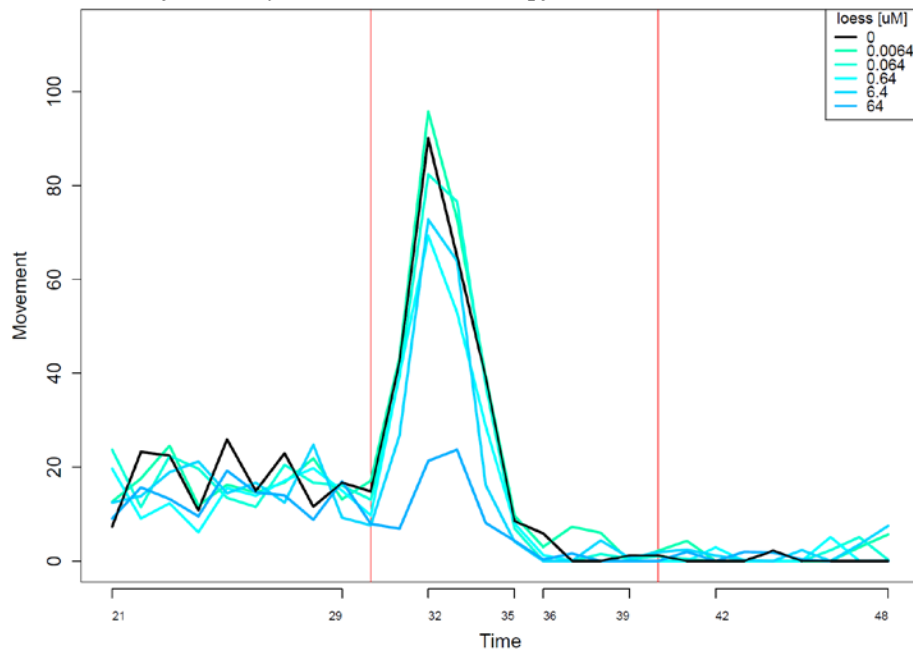

*EHDP: Zebrafish larvae PMR assay results at 120 hpf*

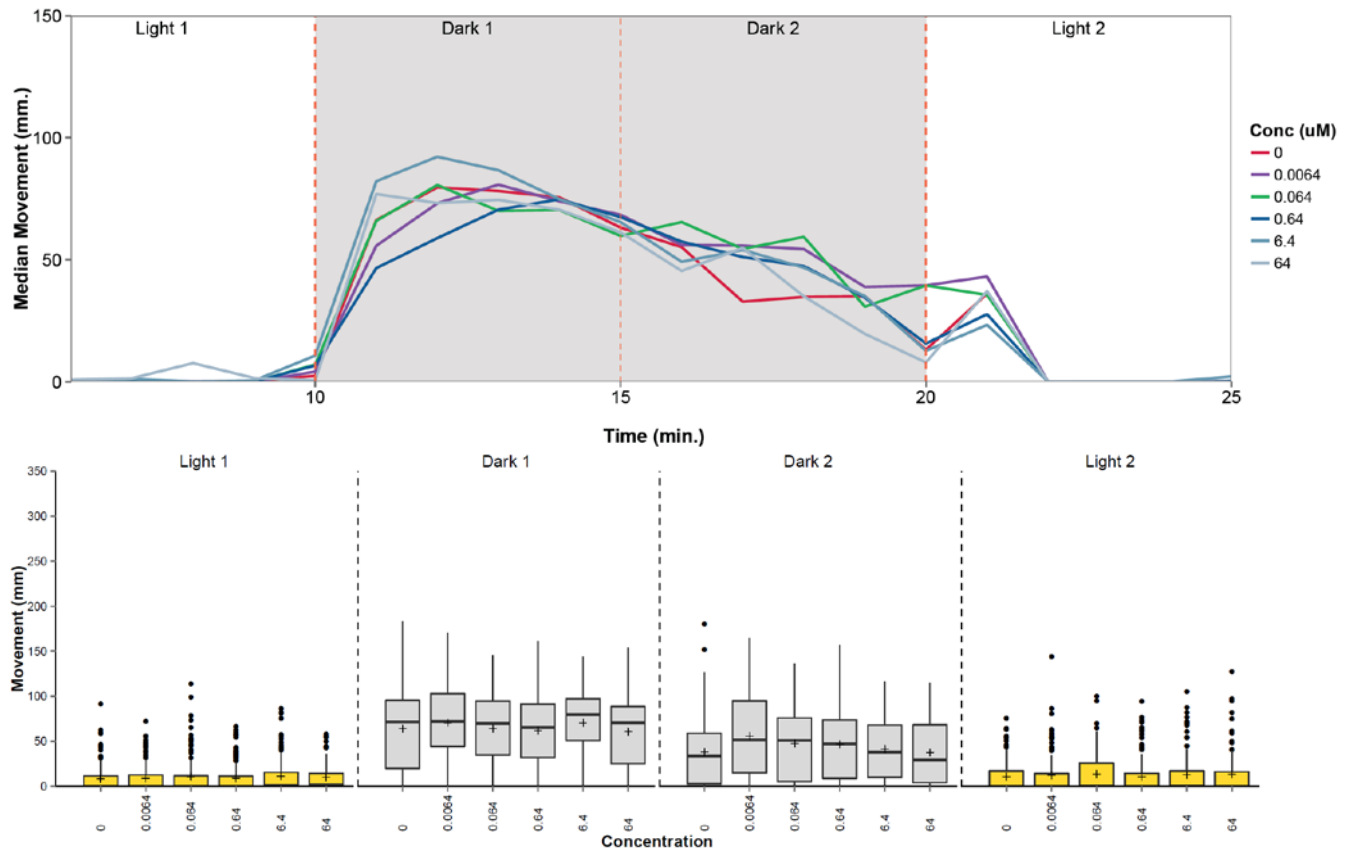

**Isodecyl diphenyl phosphate (IDDP)**

***IDDP: Zebrafish Mortality and Malformations at 24 and 120 hpf***

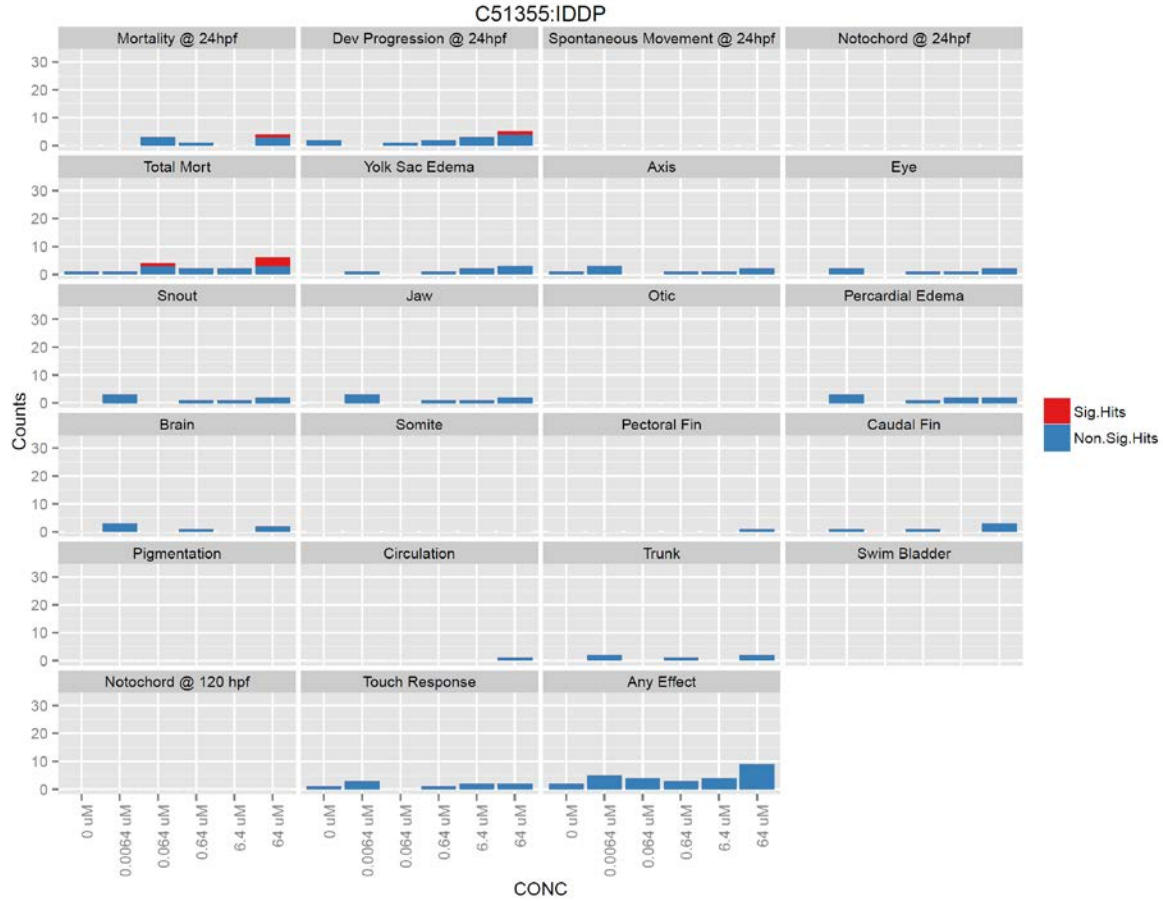

***IDDP: Zebrafish embryo PRAT results at 24 hpf***

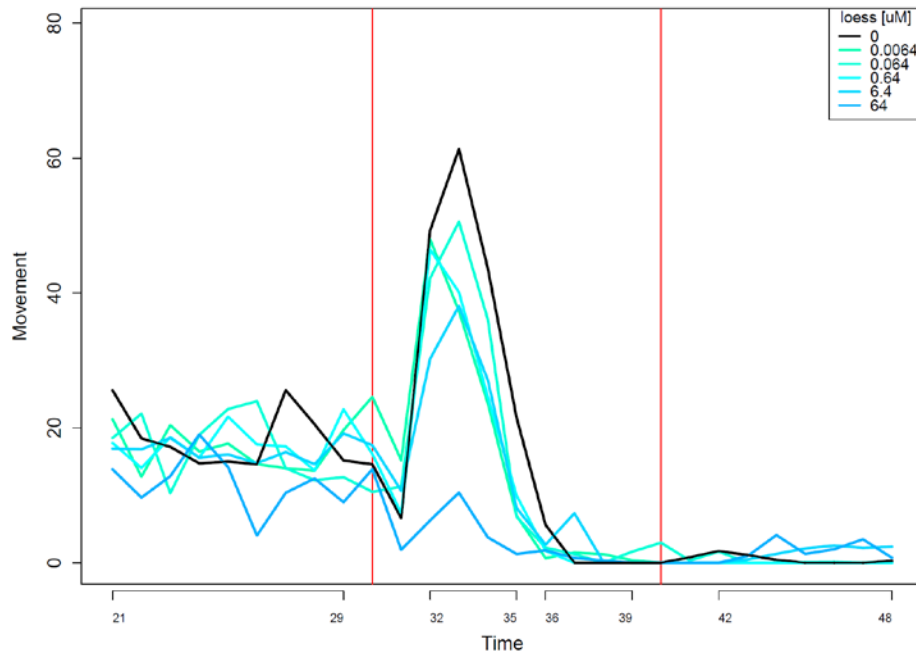

*IDDP: Zebrafish larvae PMR assay results at 120 hpf*

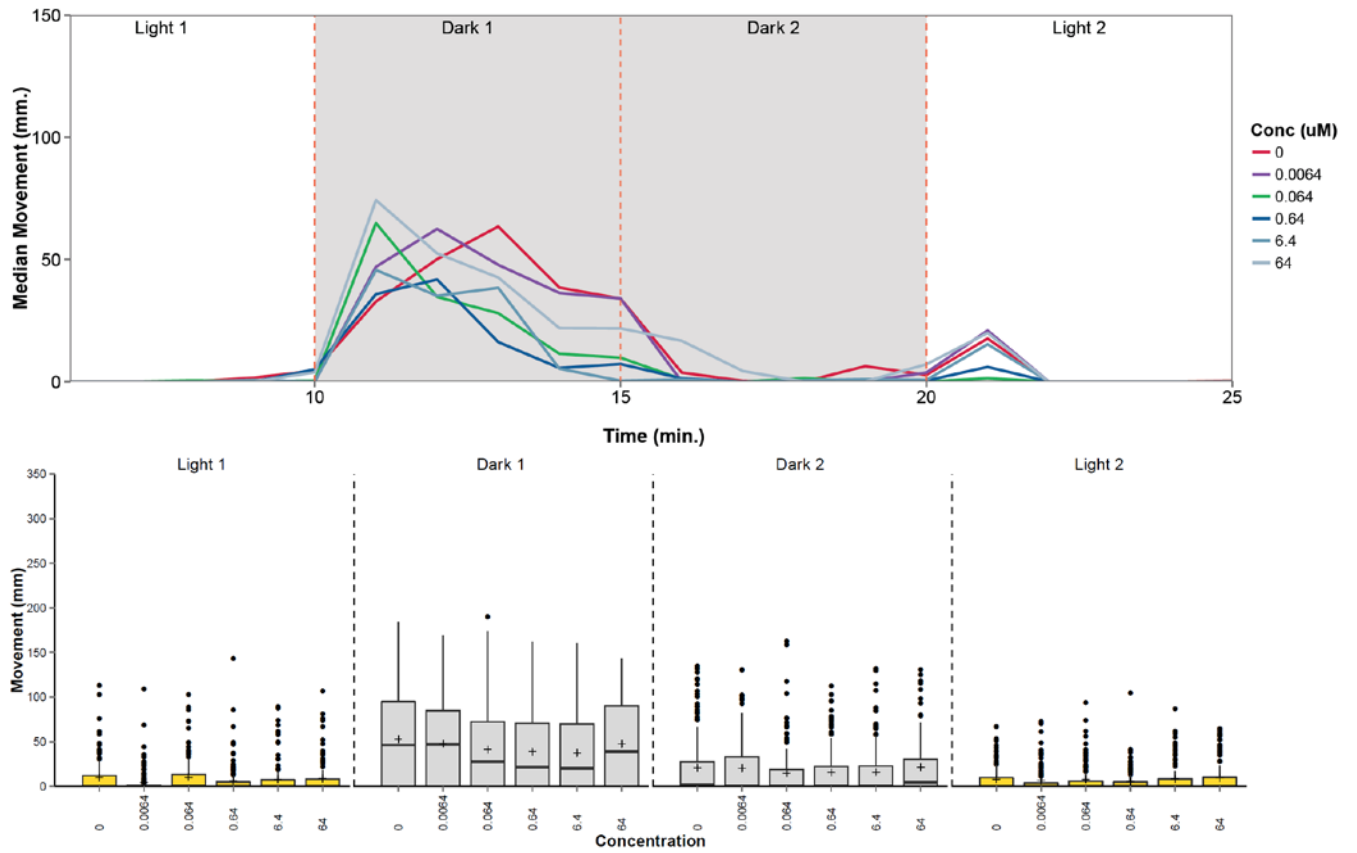

**Isopropylated triphenyl phosphate-1 (IPP-1)**

***IPP-1: Zebrafish Mortality and Malformations at 24 and 120 hpf***

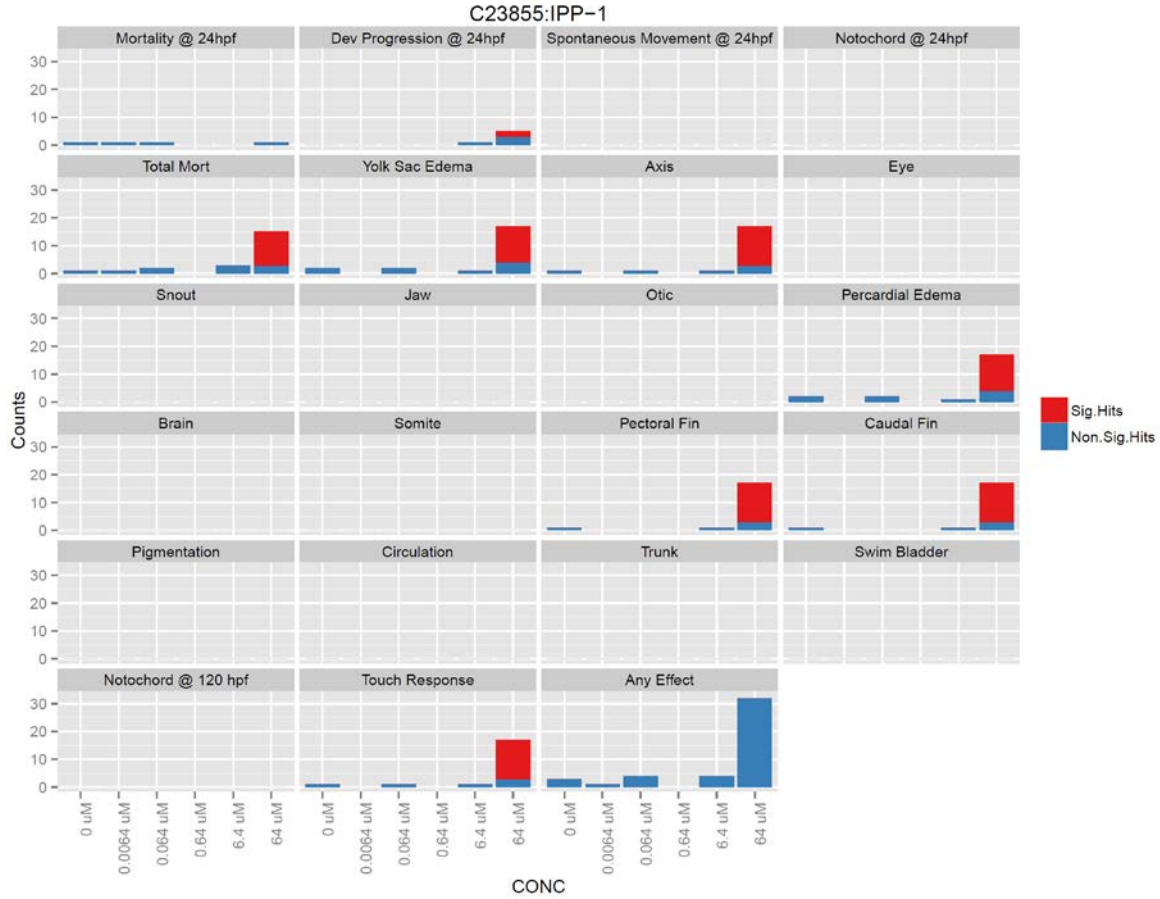

***IPP-1: Zebrafish embryo PRAT results at 24 hpf***

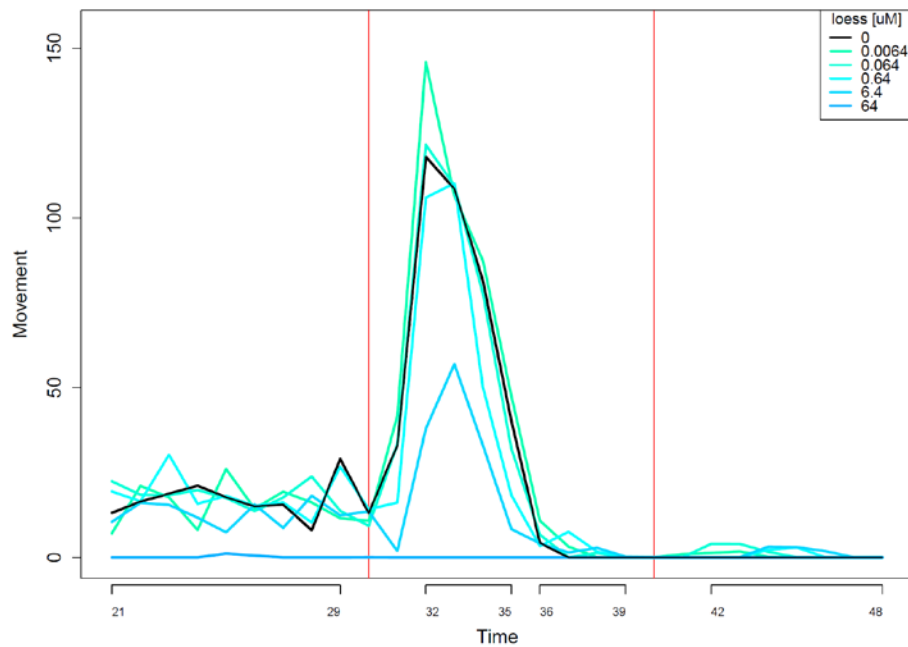

*IPP-1: Zebrafish larvae PMR assay results at 120 hpf*

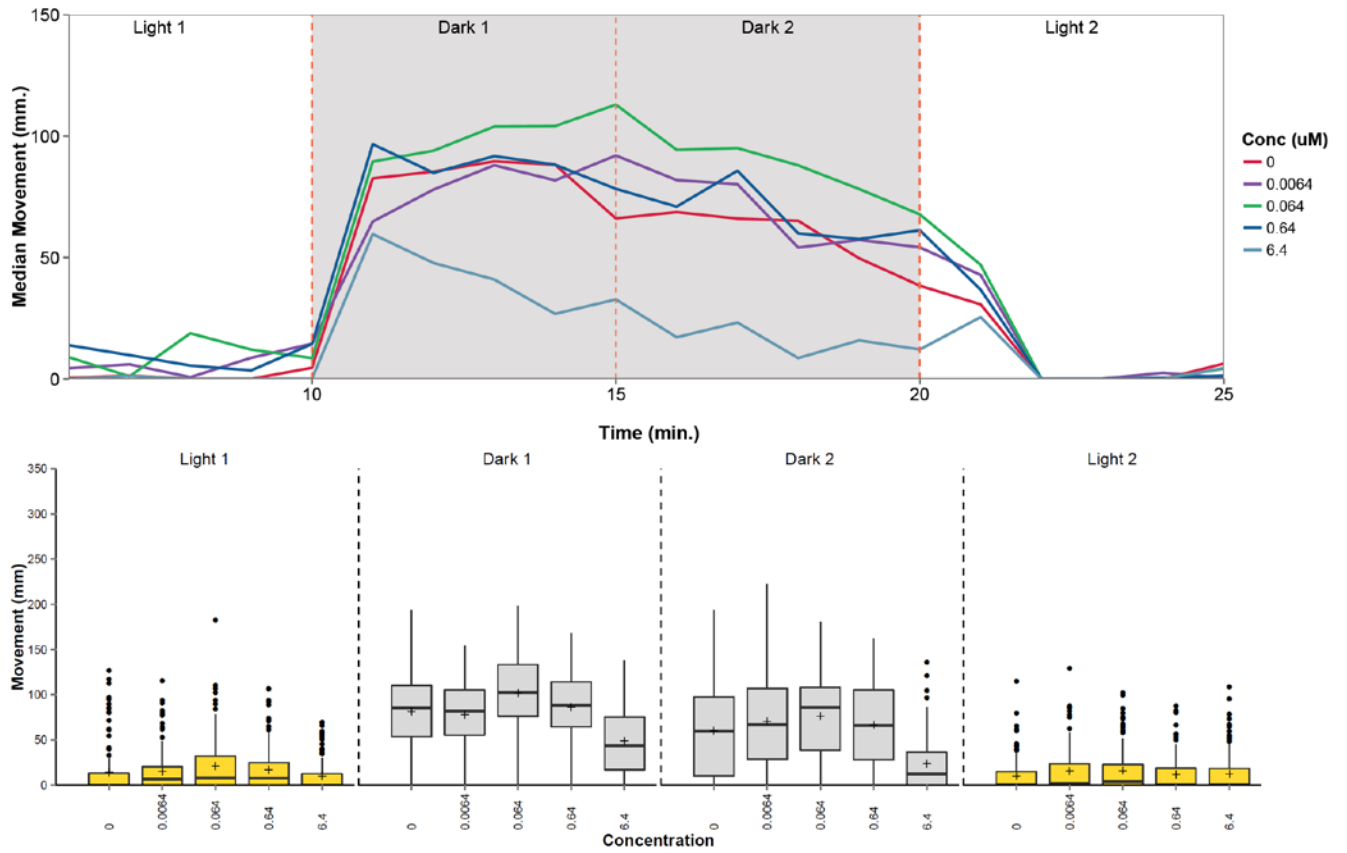



**Isopropylated triphenyl phosphate-2 (IPP-2)**

***IPP-2: Zebrafish Mortality and Malformations at 24 and 120 hpf***

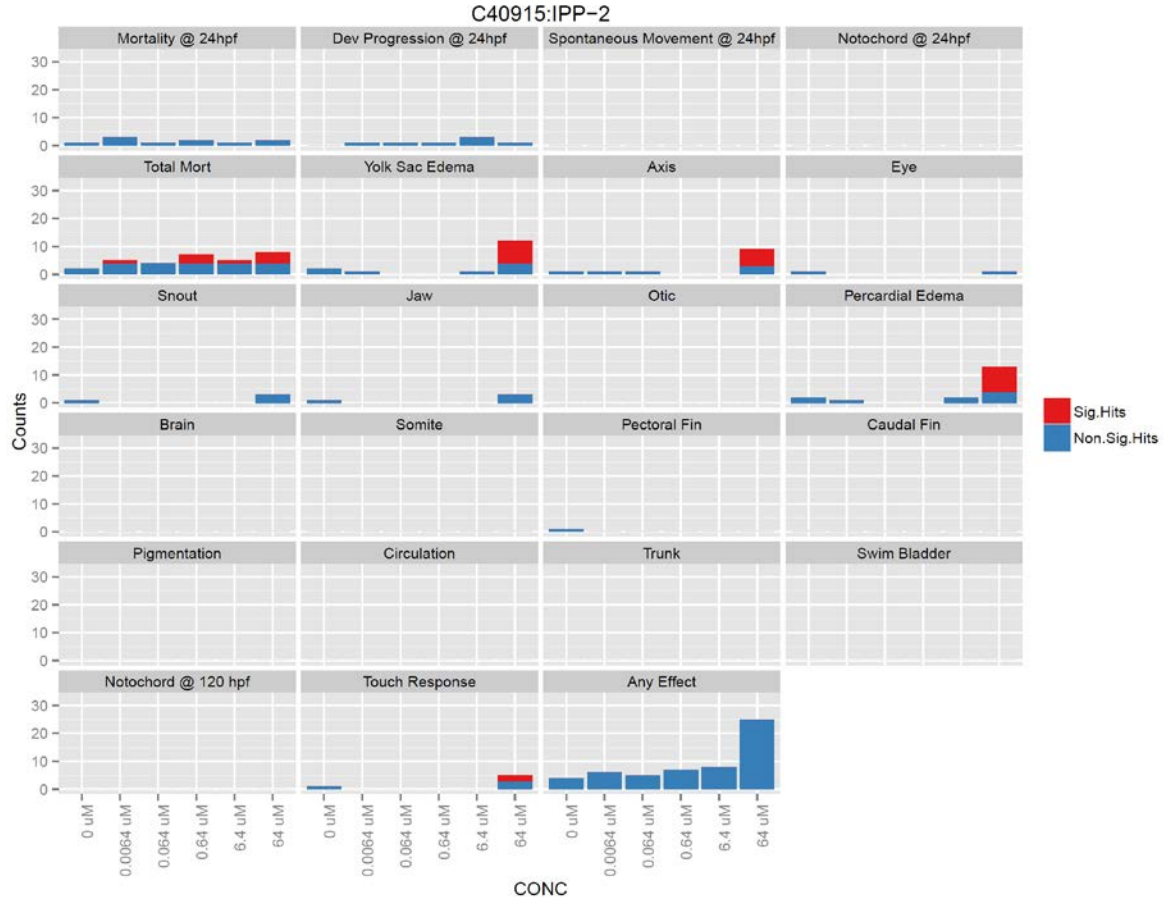

***IPP-2: Zebrafish embryo PRAT results at 24 hpf***

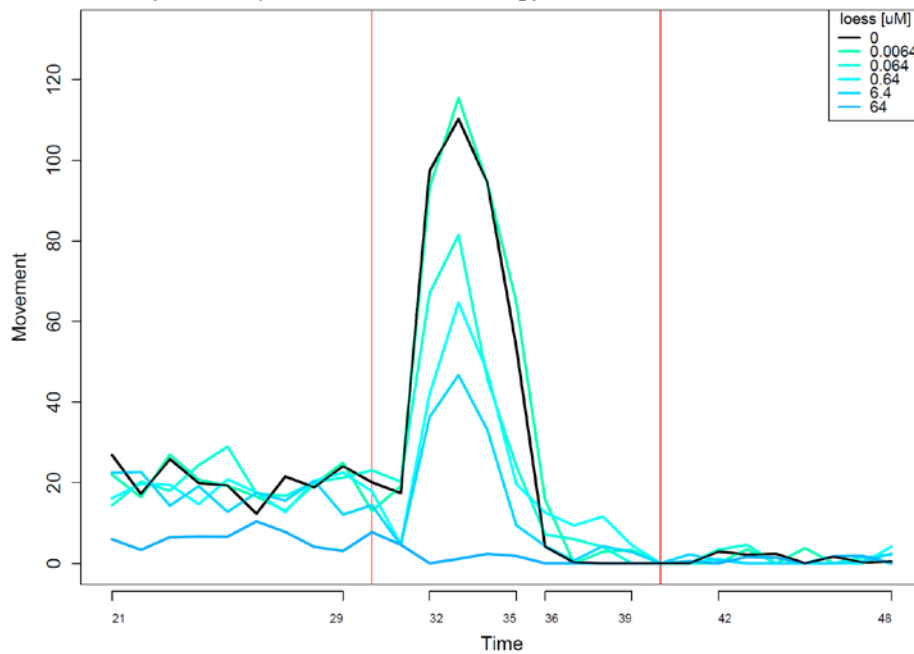

*IPP-2: Zebrafish larvae PMR assay results at 120 hpf*

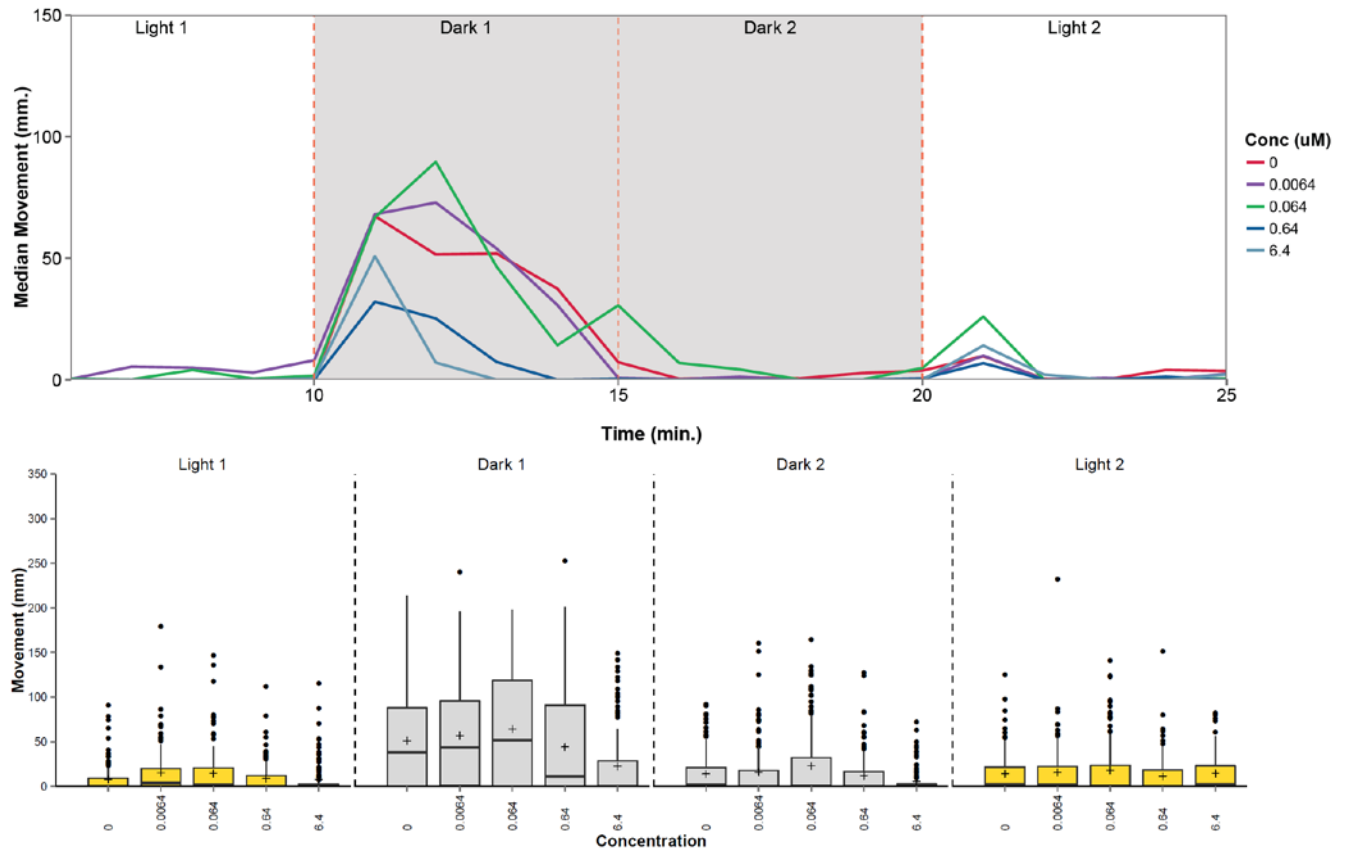

**Isopropylated triphenyl phosphate-3 (IPP-3)**

***IPP-3: Zebrafish Mortality and Malformations at 24 and 120 hpf***

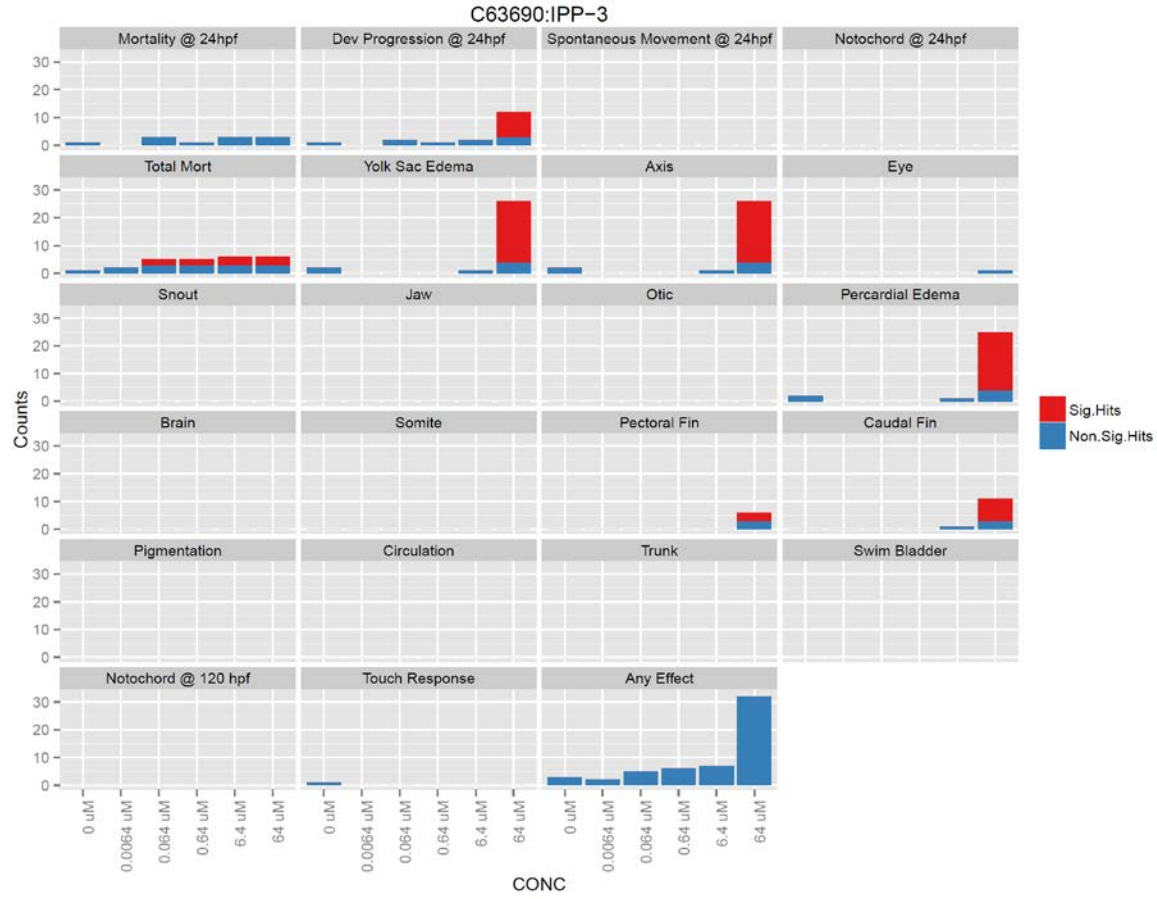

***IPP-3: Zebrafish embryo PRAT results at 24 hpf***

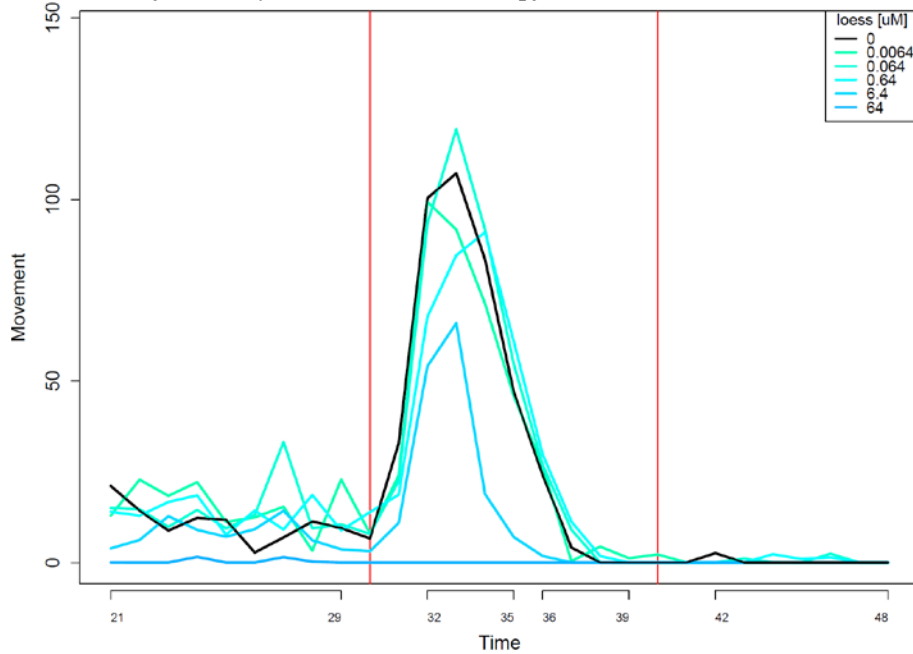

**IPP-3: Zebrafish larvae PMR assay results at 120 hpf**

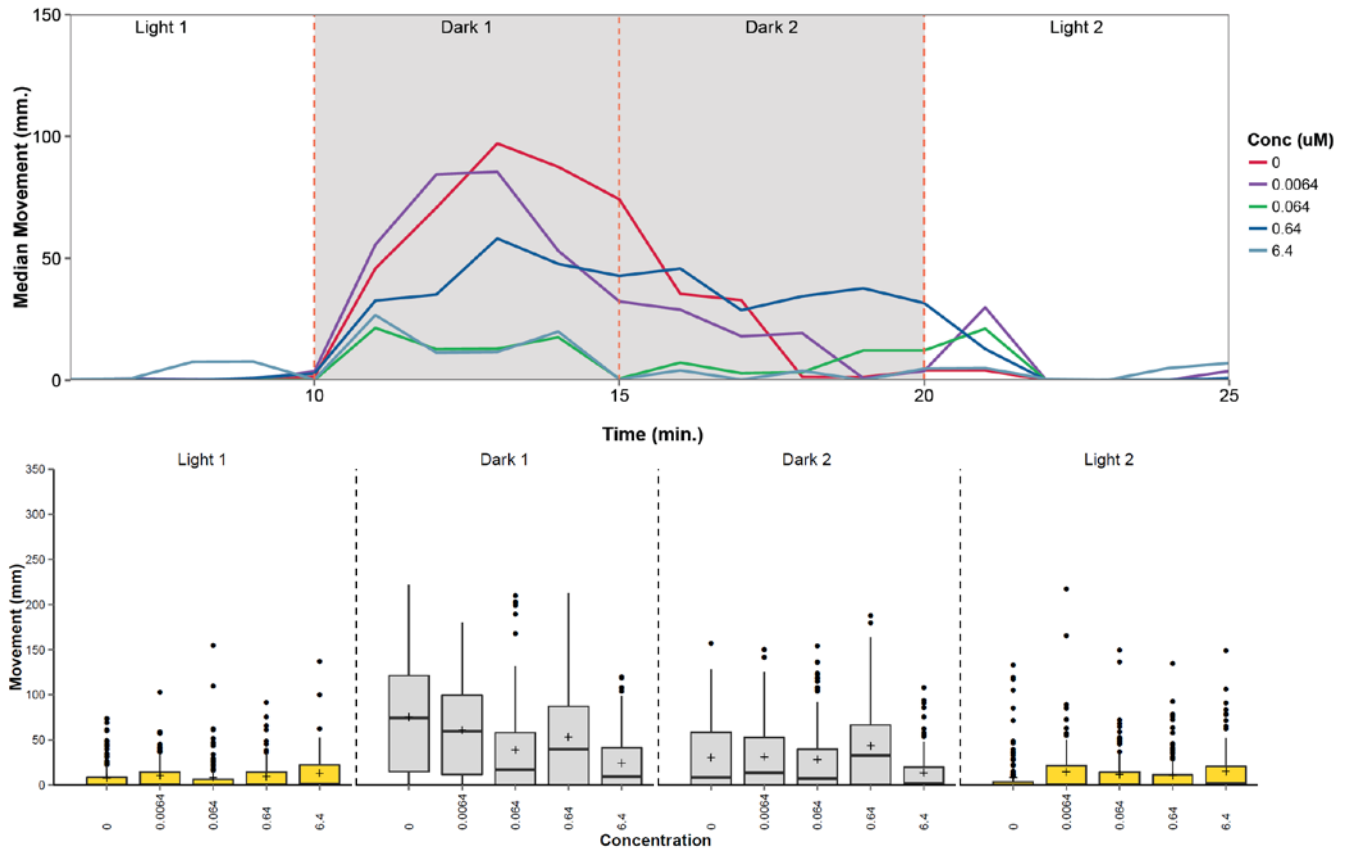

**Mono-substituted isopropylated triaryl phosphate (ortho-, meta, para mix) (mITP)**

***mITP: Zebrafish Mortality and Malformations at 24 and 120 hpf***

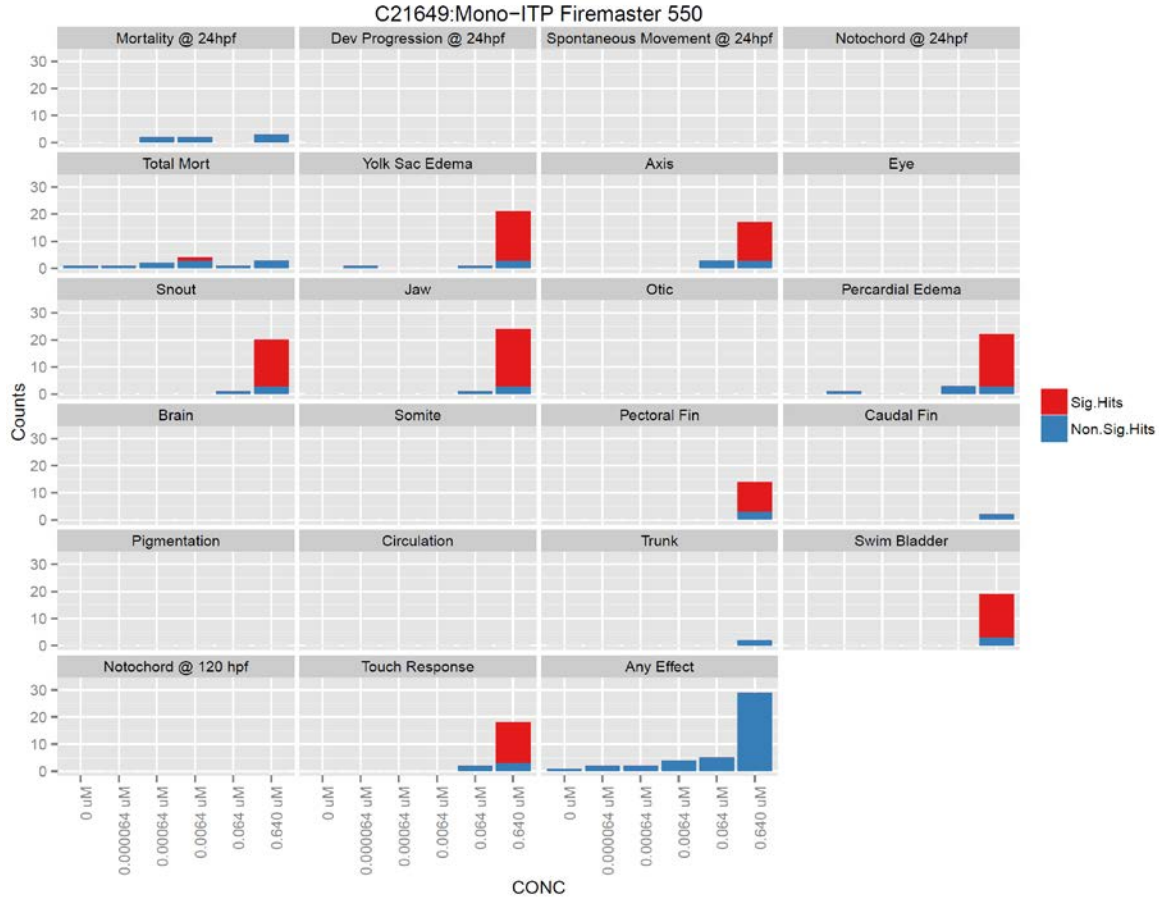

***mITP: Zebrafish embryo PRAT results at 24 hpf***

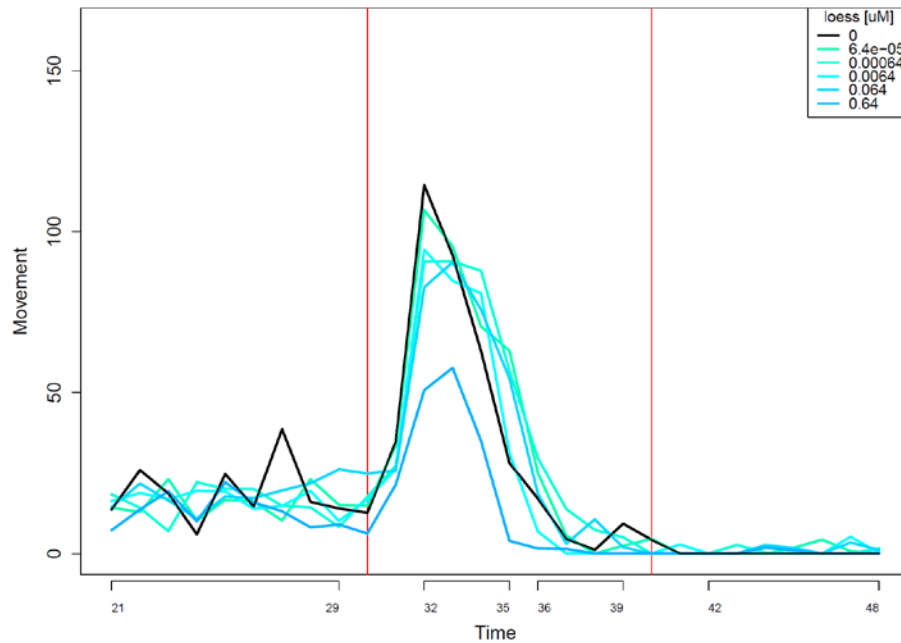

*mITP: Zebrafish larvae PMR assay results at 120 hpf*

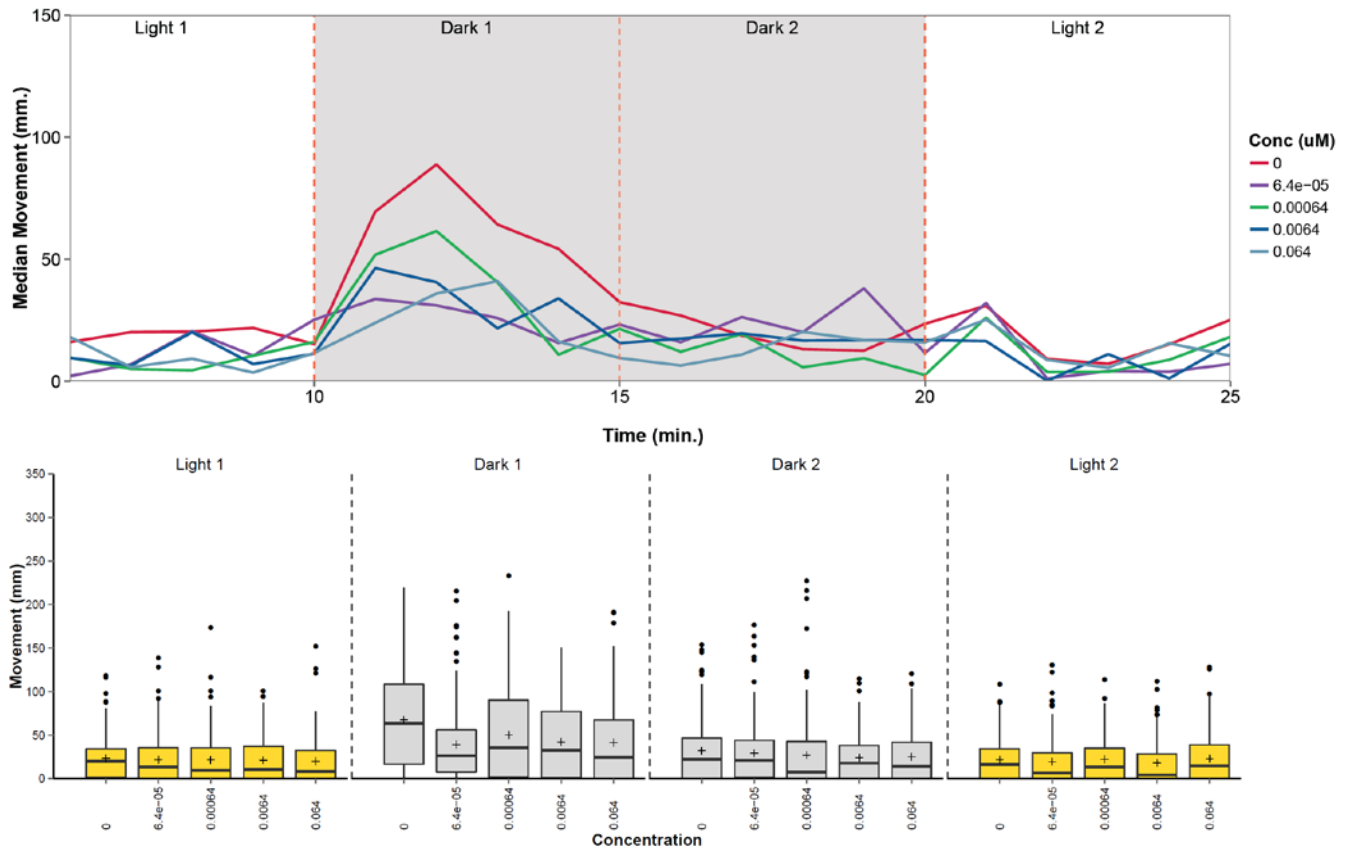

**Tri-*o*-cresyl phosphate (o-TCP)**

***o*-TCP: Zebrafish Mortality and Malformations at 24 and 120 hpf**

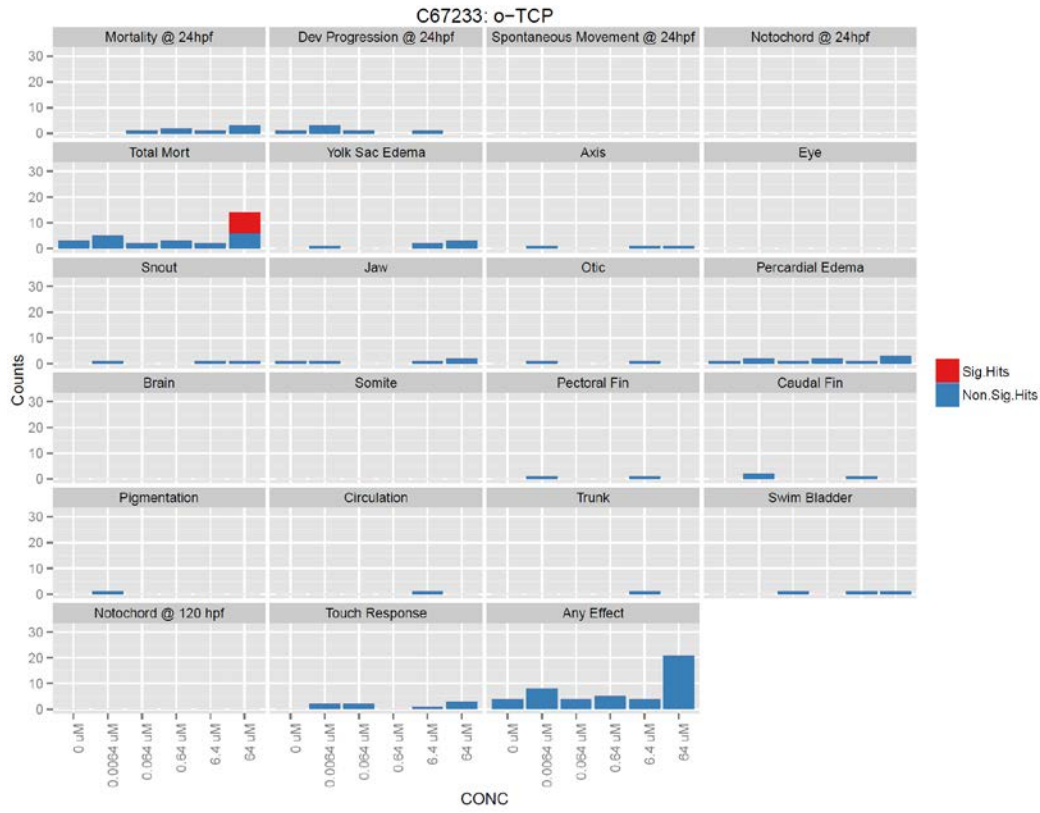

***o*-TCP: Zebrafish embryo PRAT results at 24 hpf**

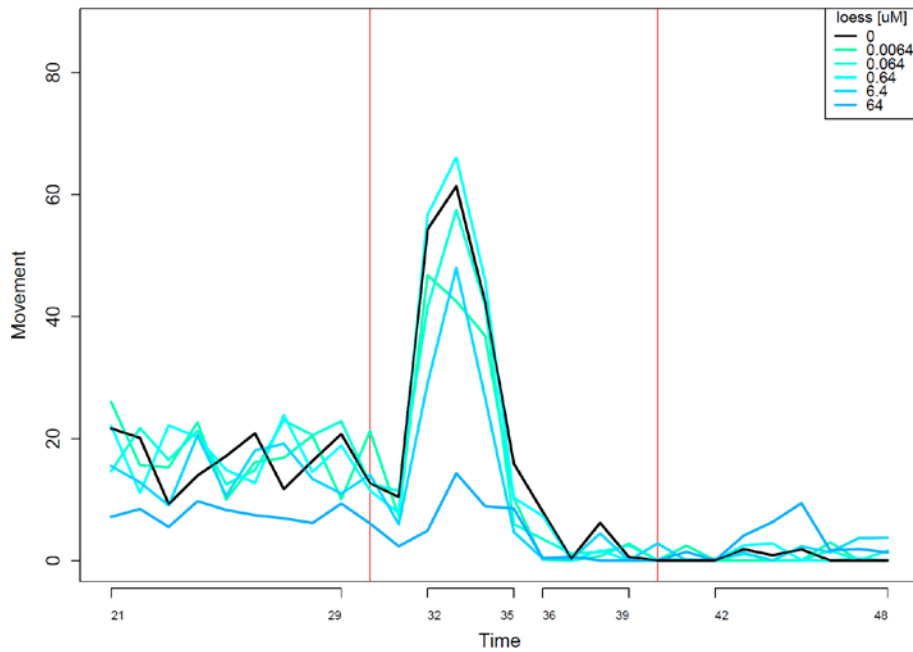

*o*-TCP: Zebrafish larvae PMR assay results at 120 hpf

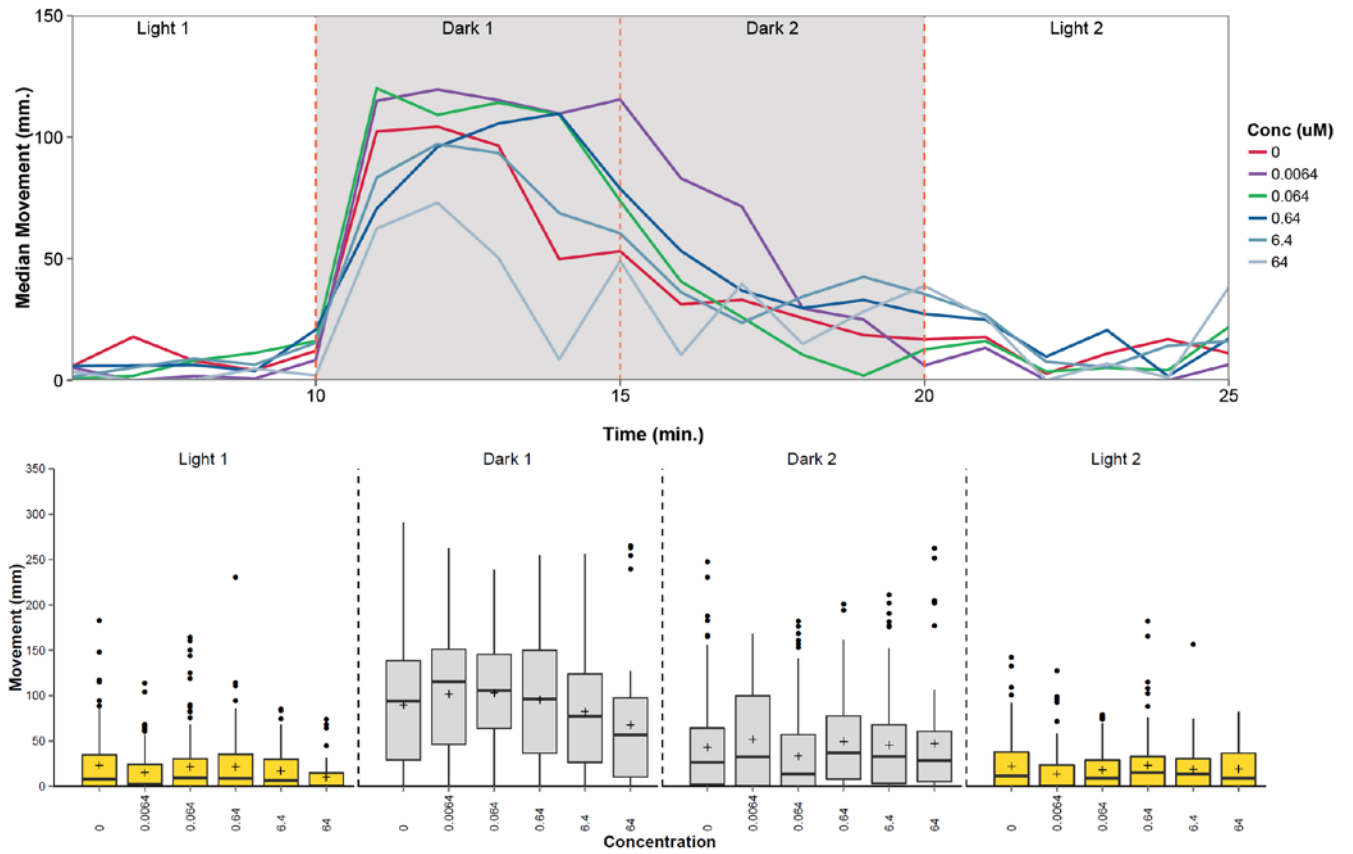



**Resorcinol A bis-(diphenyl phosphate) (RDP)**

***RDP: Zebrafish Mortality and Malformations at 24 and 120 hpf***

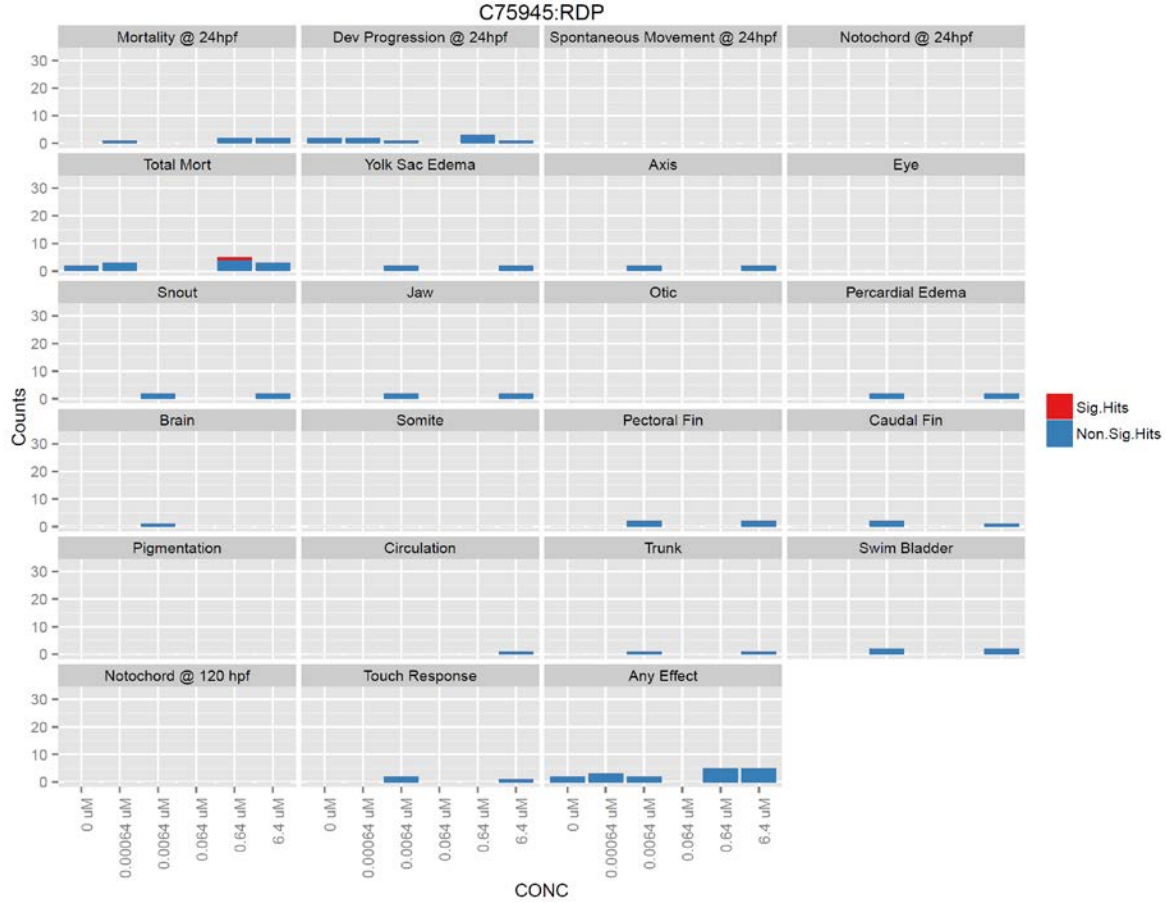

***RDP: Zebrafish embryo PRAT results at 24 hpf***

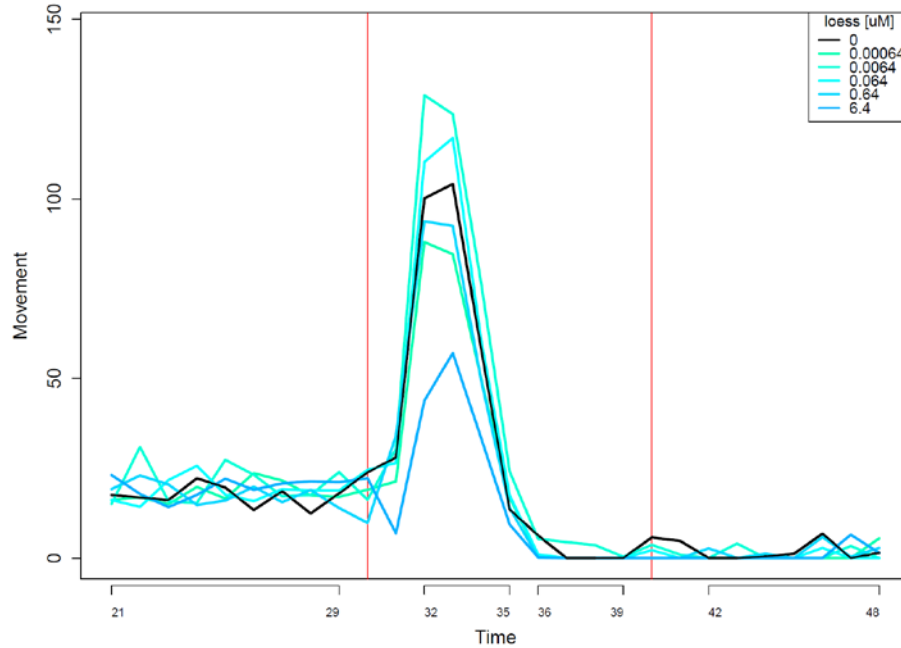

**RDP: Zebrafish larvae PMR assay results at 120 hpf**

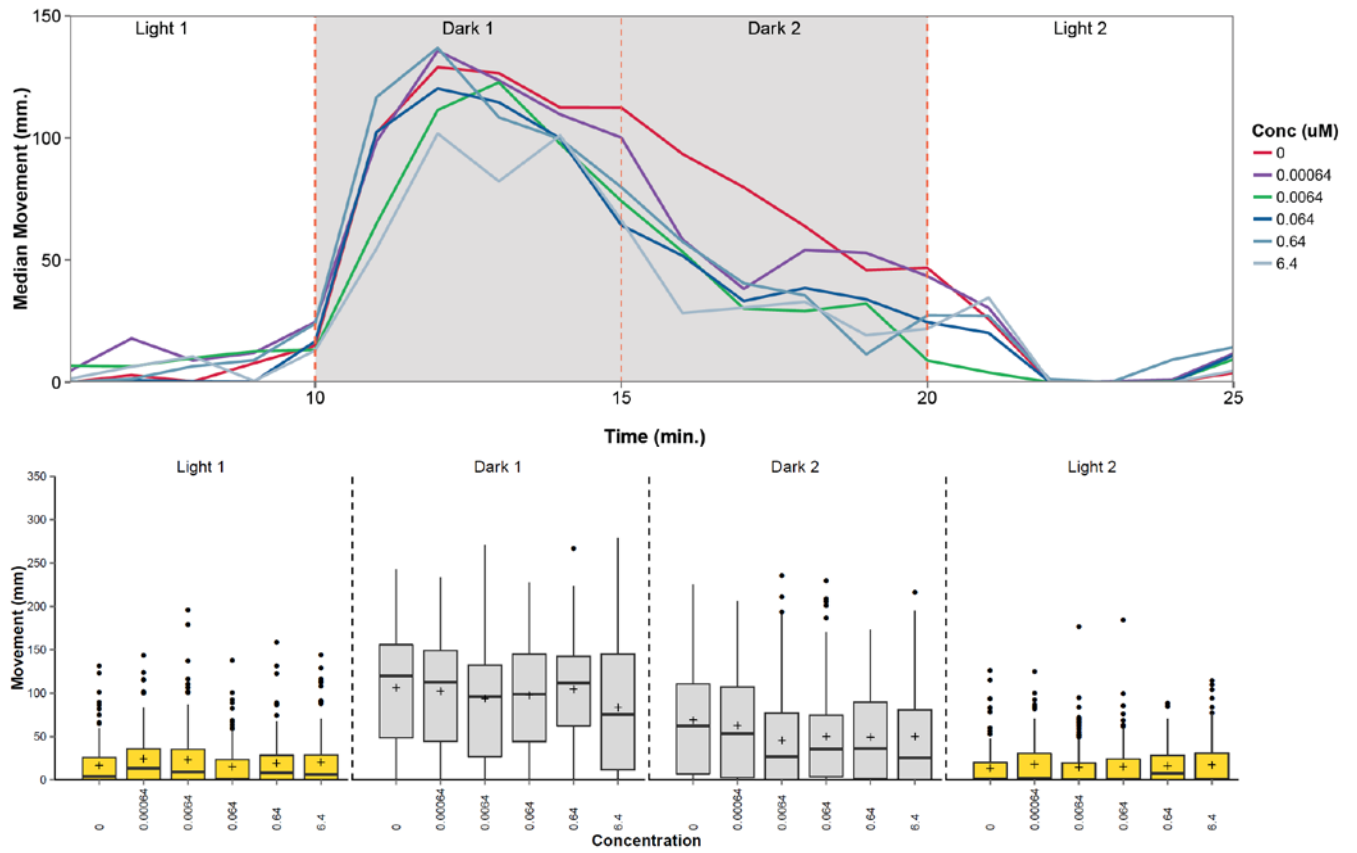

**Tributyl phosphate (TBP)**

**TBP: Zebrafish Mortality and Malformations at 24 and 120 hpf**

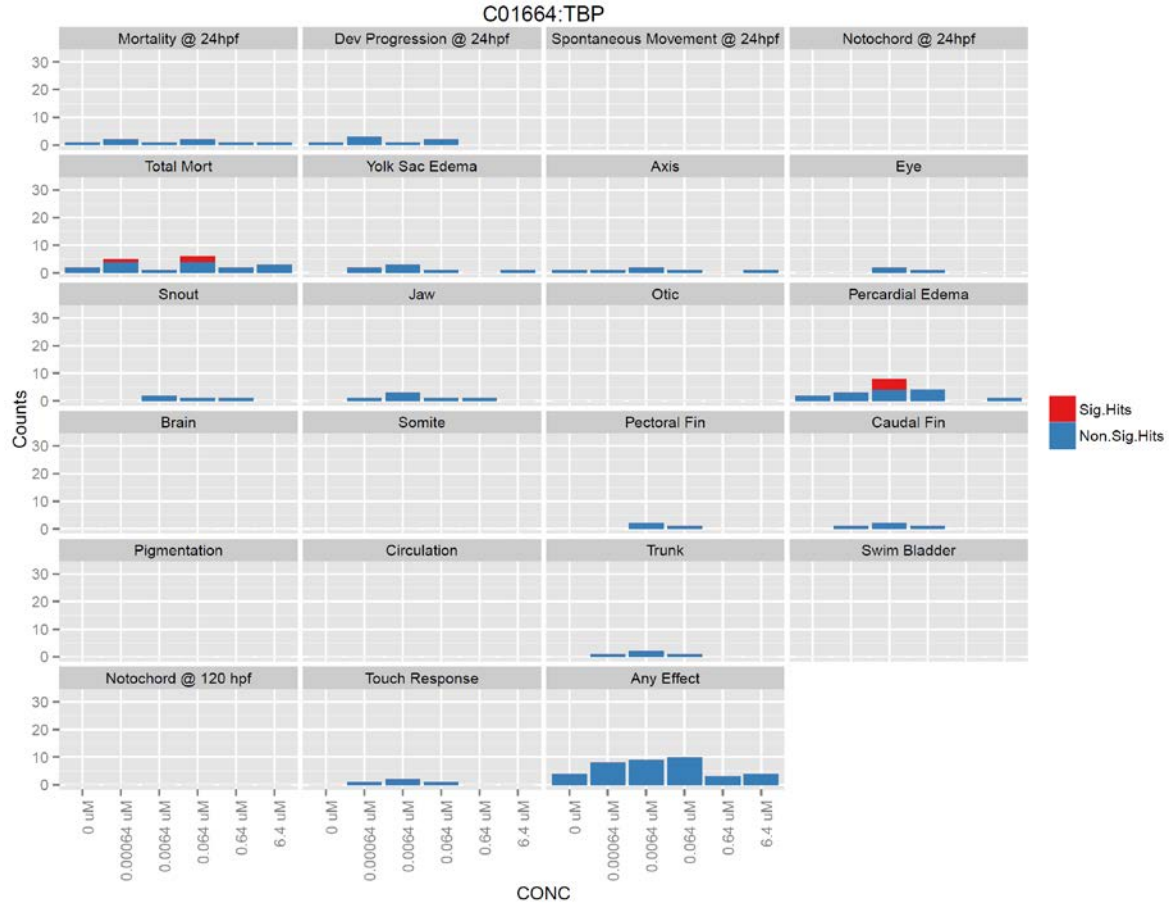

**TBP: Zebrafish embryo PRAT results at 24 hpf**

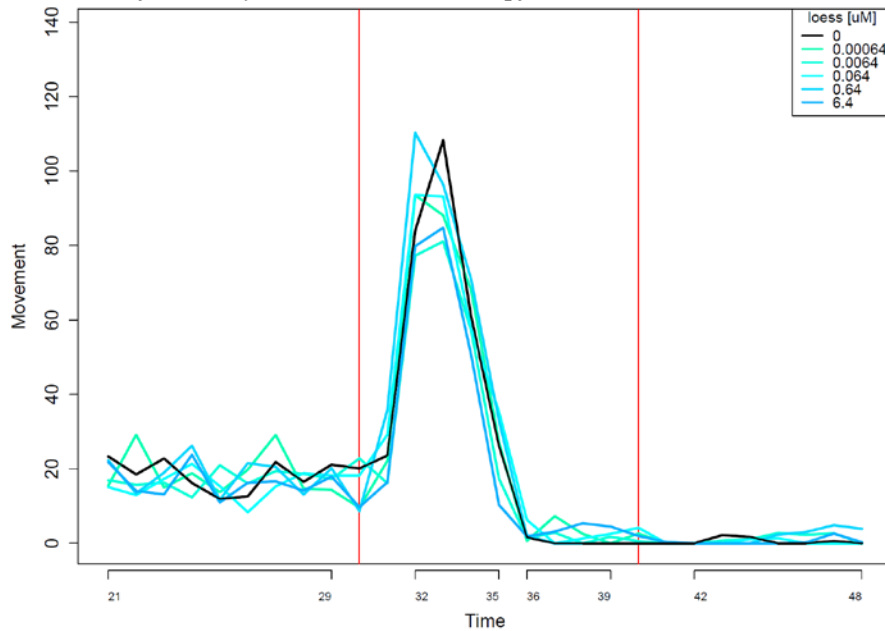

**TBP: Zebrafish larvae PMR assay results at 120 hpf**

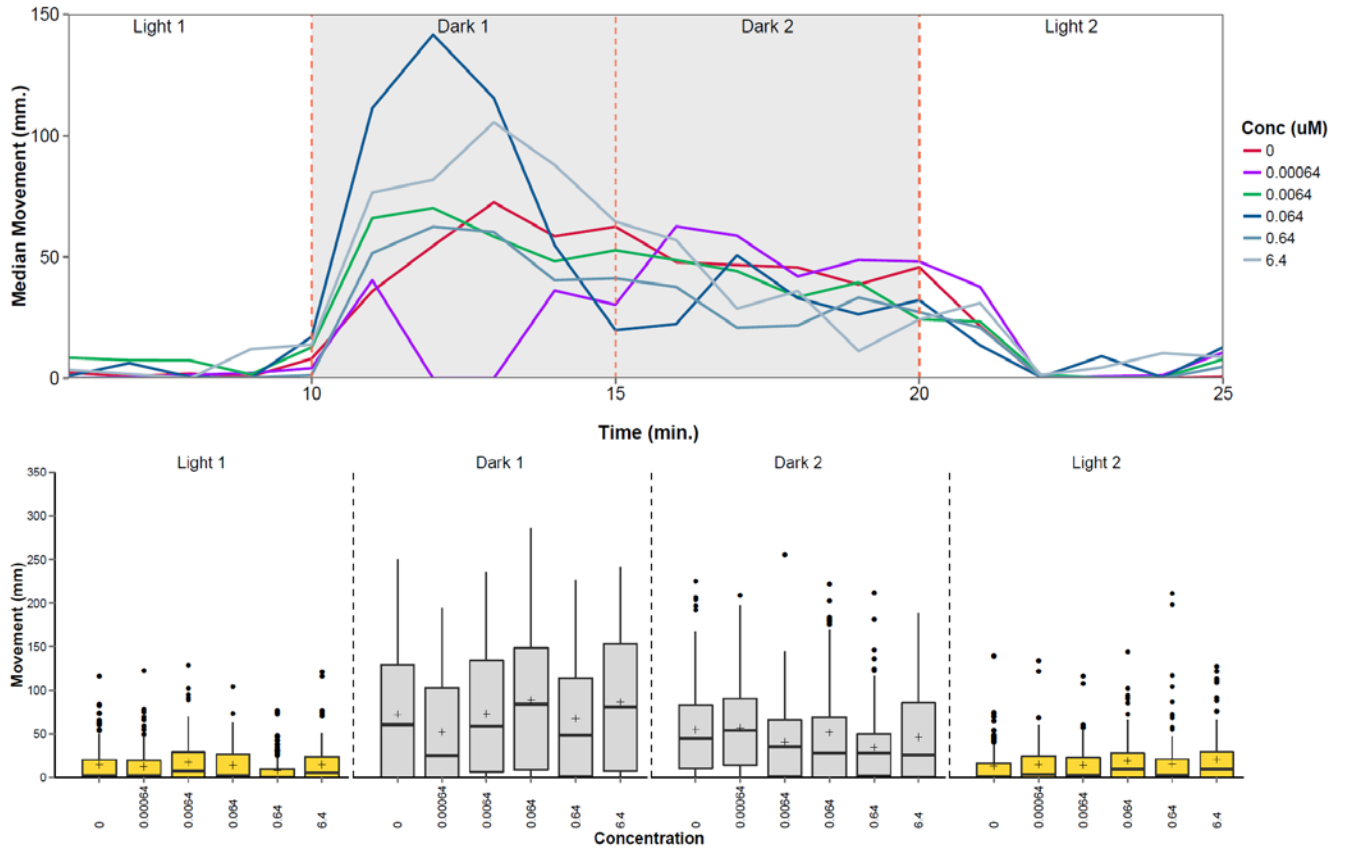

**Tris (2-butoxyethyl) phosphate TBEP**

**TBEP: Zebrafish Mortality and Malformations at 24 and 120 hpf**

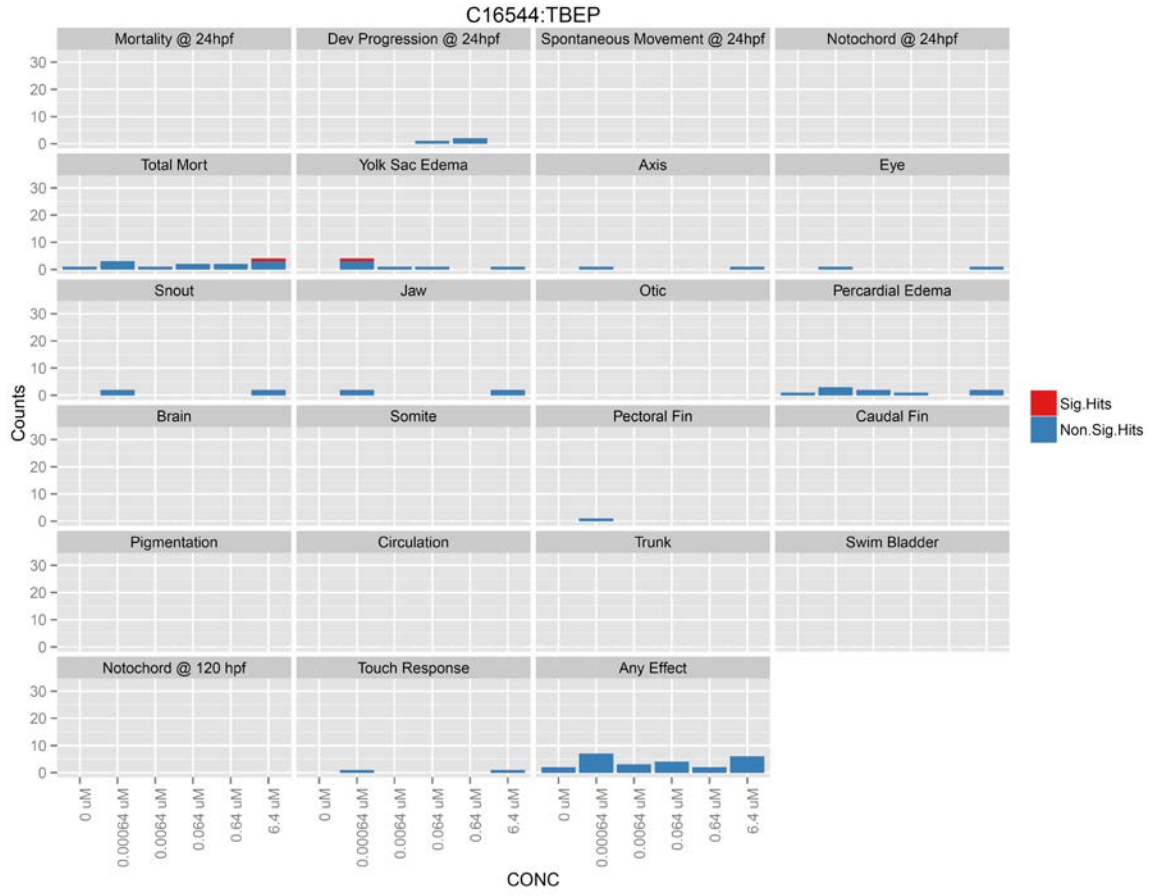

**TBEP: Zebrafish embryo PRAT results at 24 hpf**

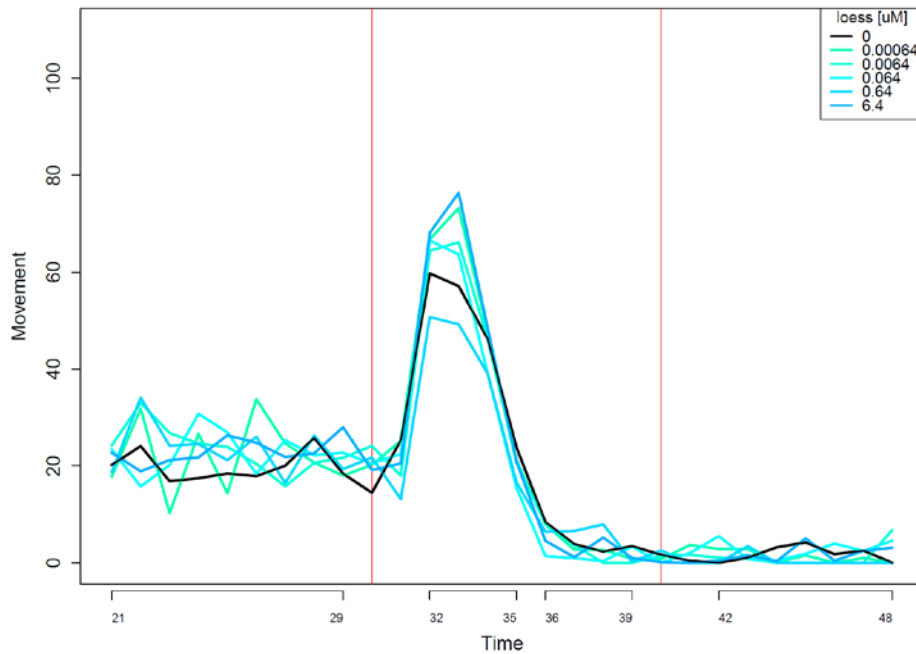

**TBEP: Zebrafish larvae PMR assay results at 120 hpf**

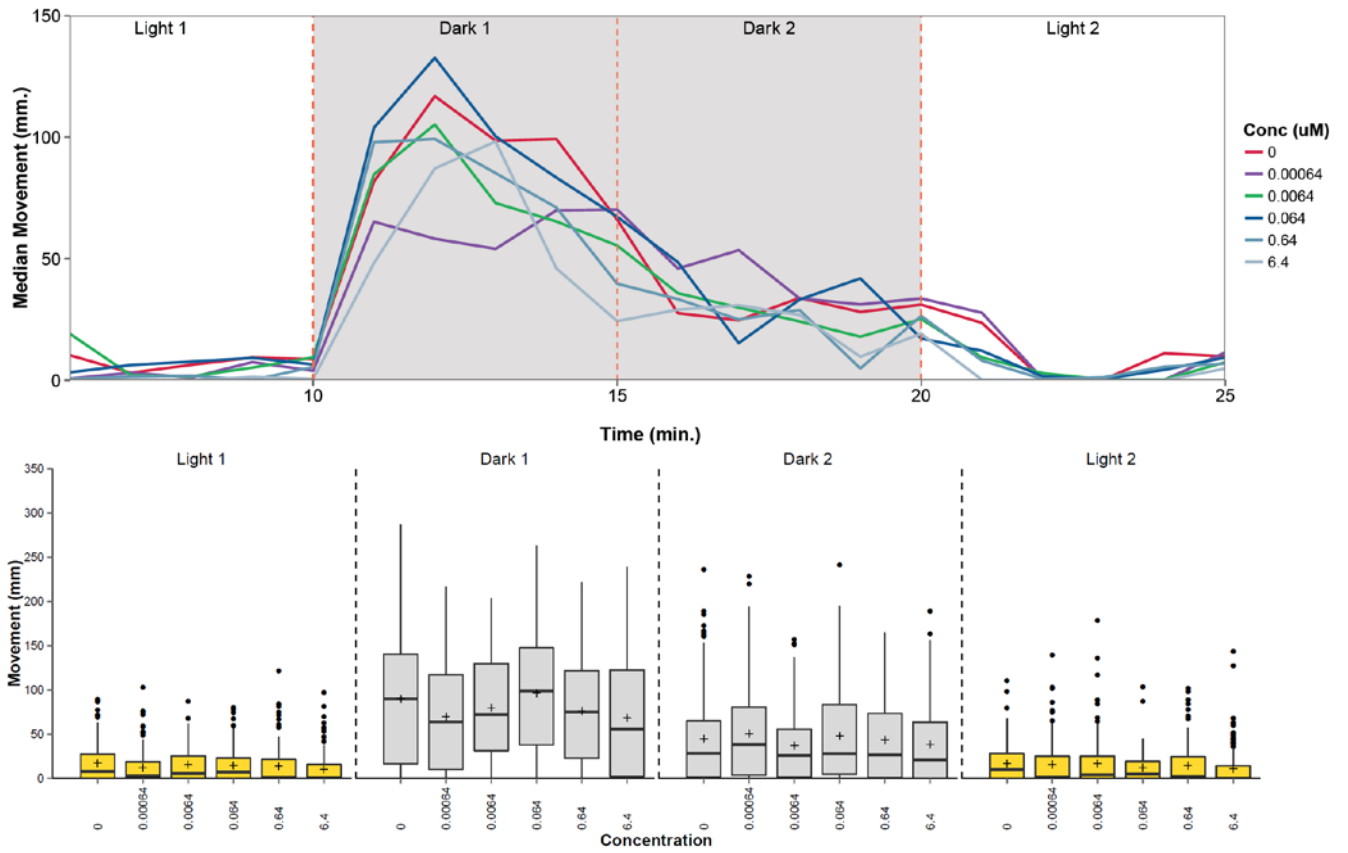

**Tricresyl phosphate (TCP)**

**TCP: Zebrafish Mortality and Malformations at 24 and 120 hpf**

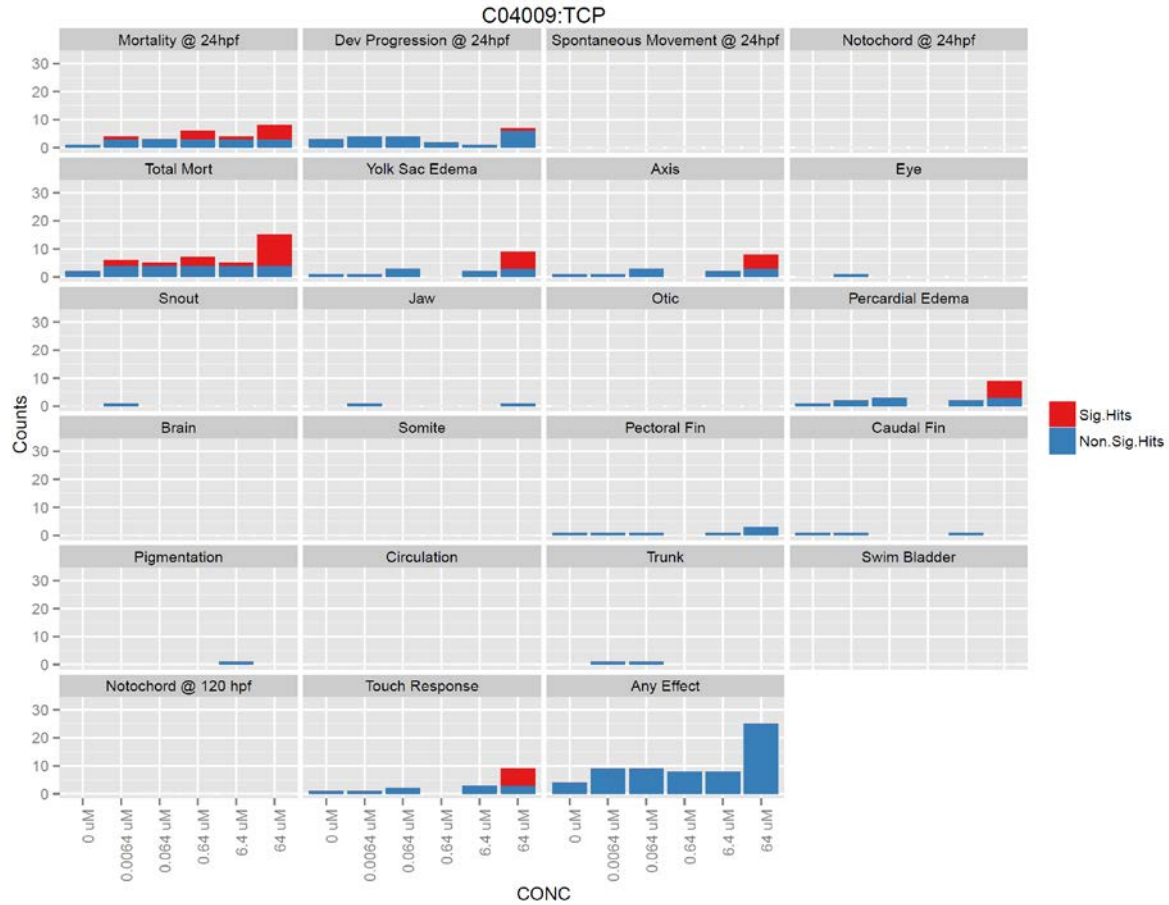

**TCP: Zebrafish embryo PRAT results at 24 hpf**

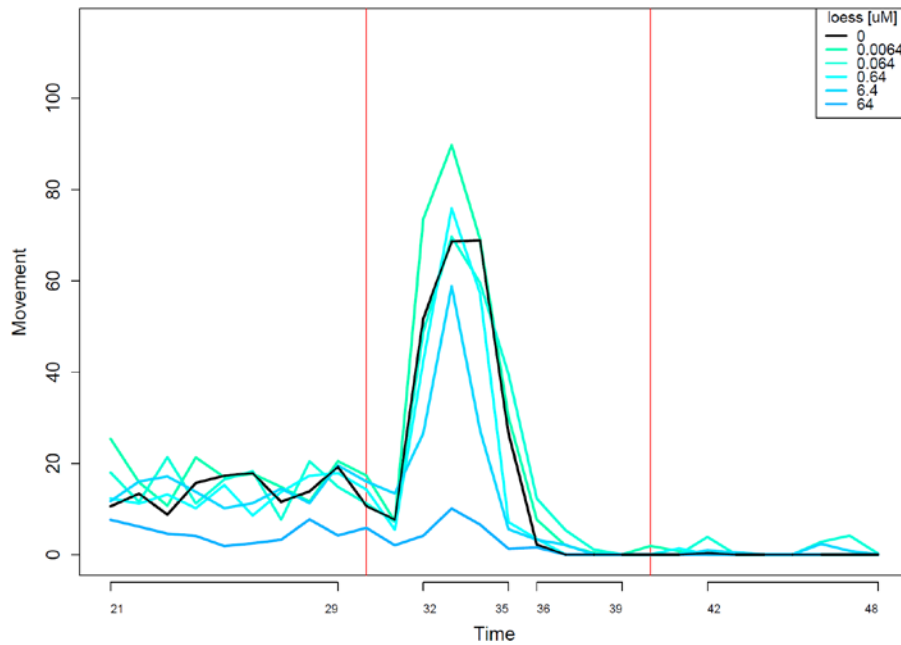

*TCP: Zebrafish larvae PMR assay results at 120 hpf*

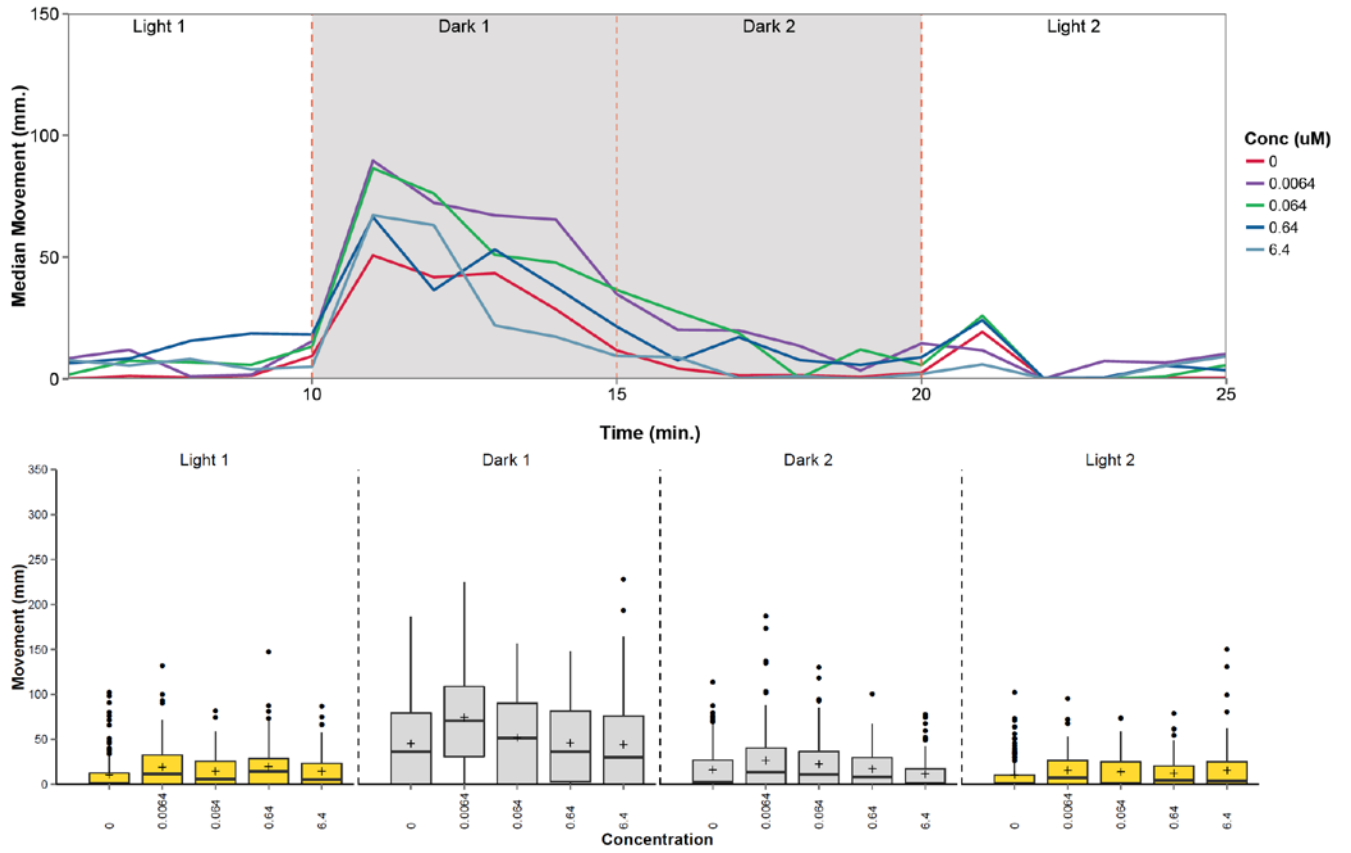



**Tris (2-ethylhexyl) phosphate (TEHP)**

***TEHP: Zebrafish Mortality and Malformations at 24 and 120 hpf***

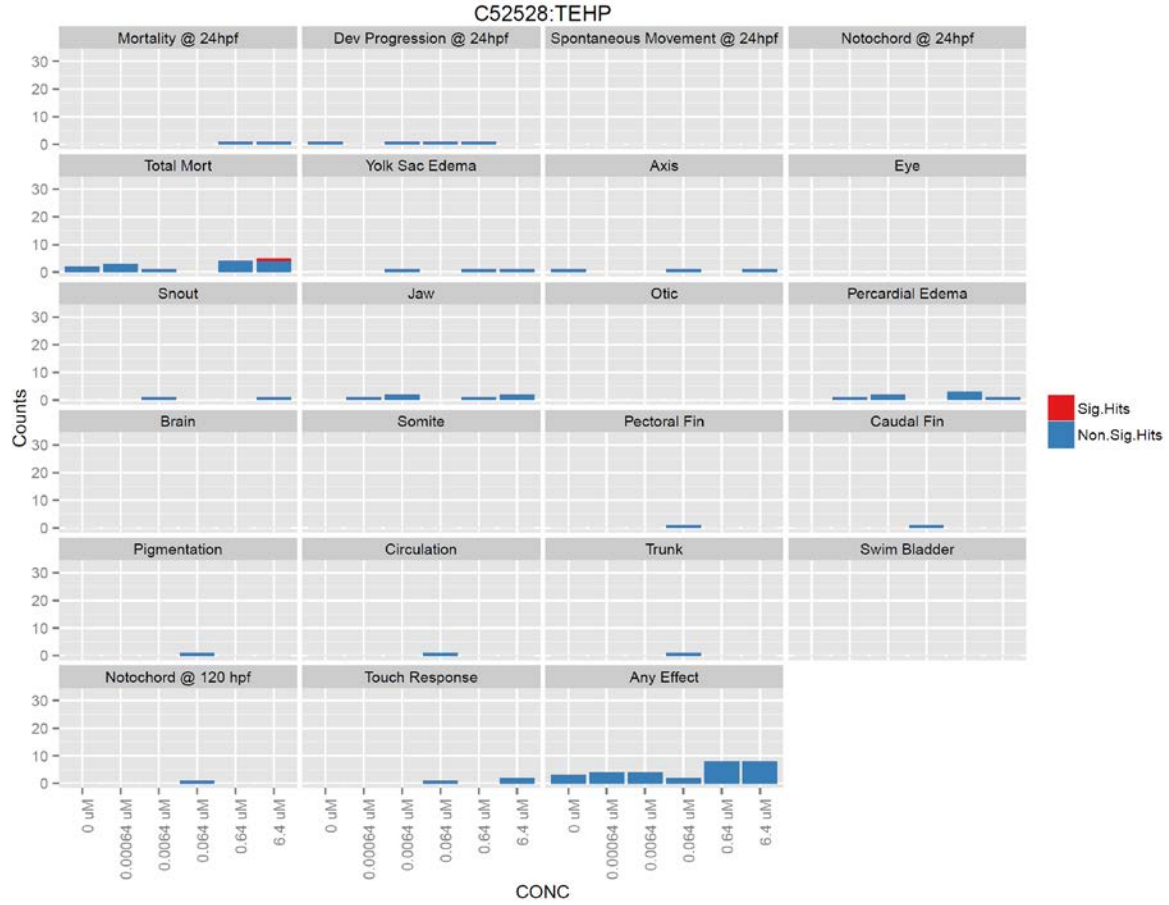

***TEHP: Zebrafish embryo PRAT results at 24 hpf***

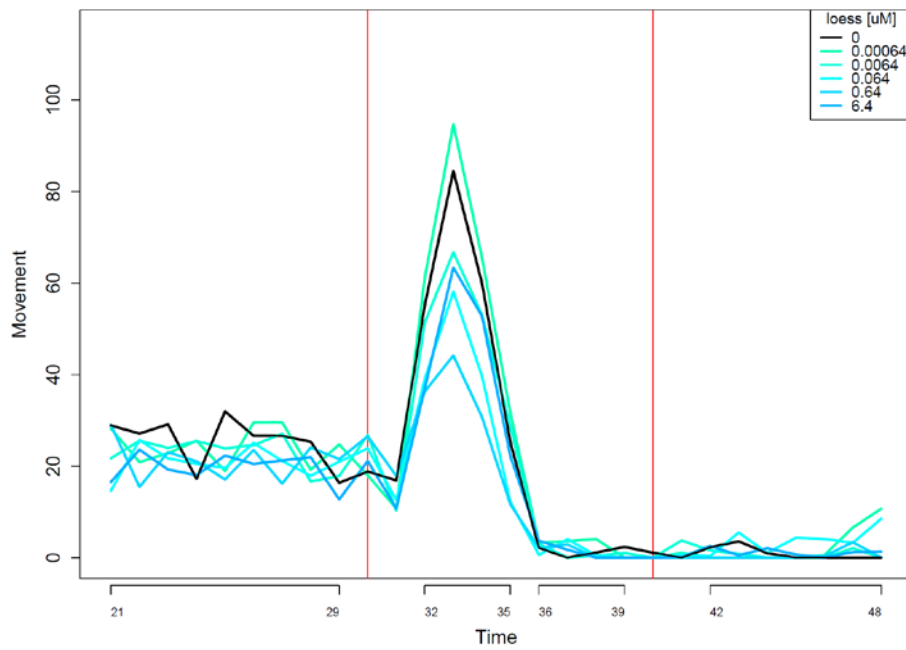

**TEHP: Zebrafish larvae PMR assay results at 120 hpf**

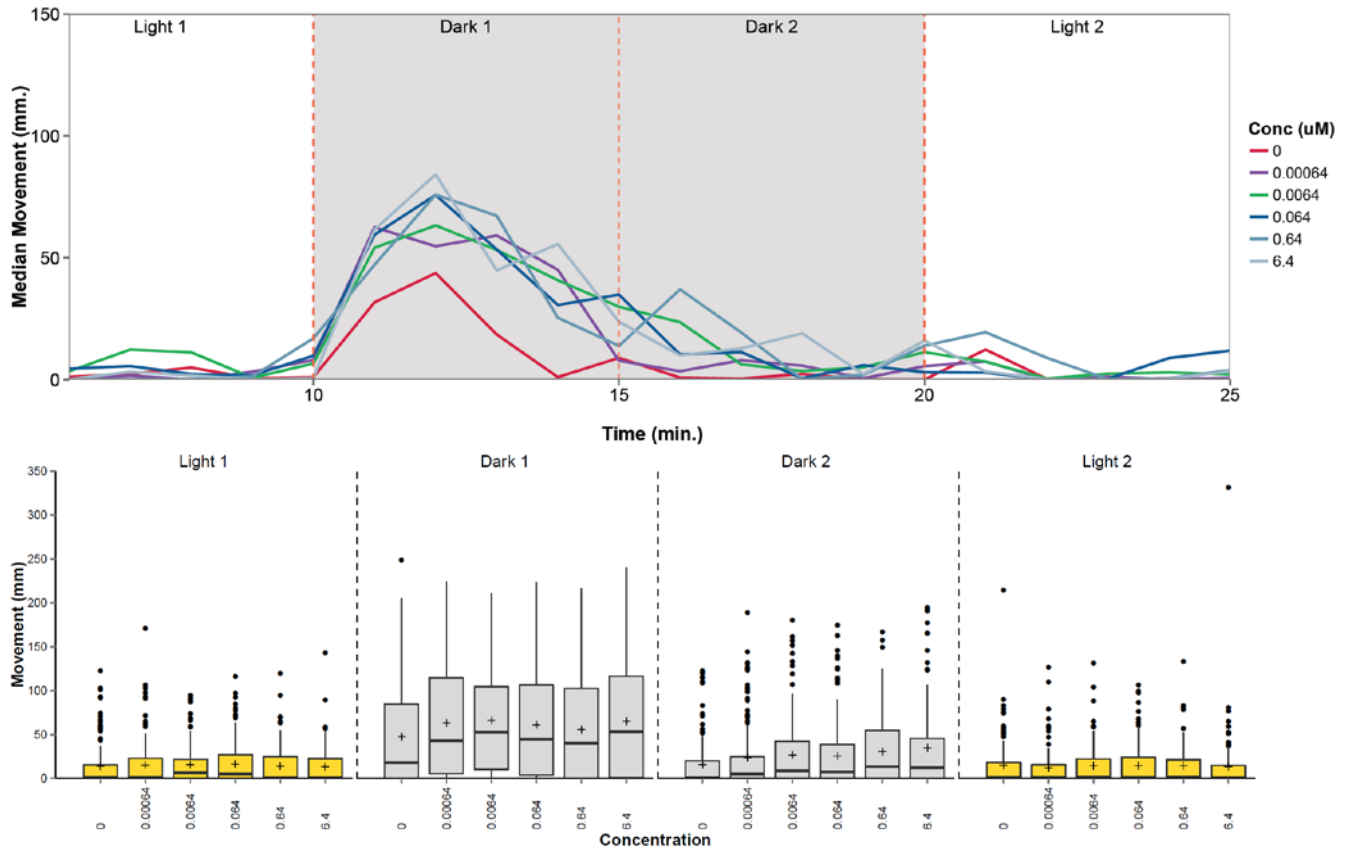

**Triphenyl phosphate (TPP)**

**TPP: Zebrafish Mortality and Malformations at 24 and 120 hpf**

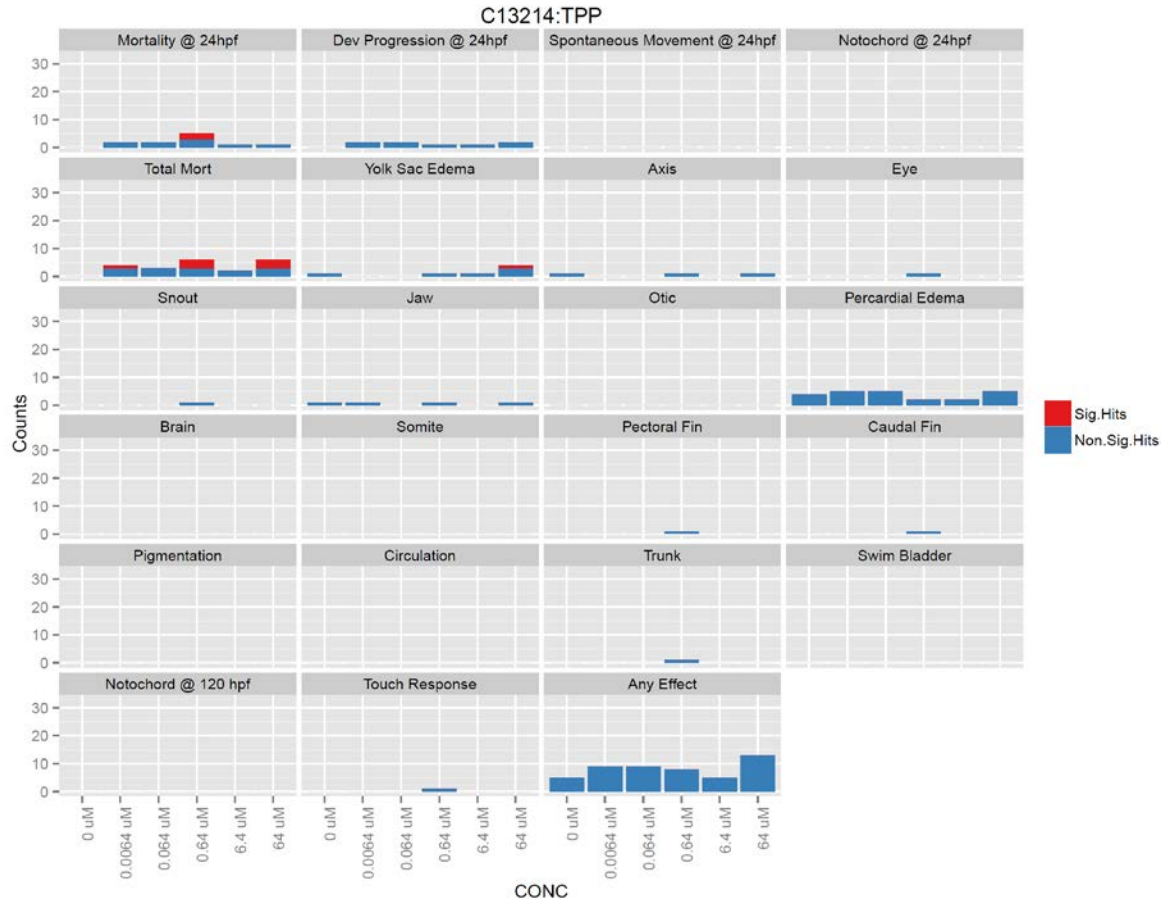

**TPP: Zebrafish embryo PRAT results at 24 hpf**

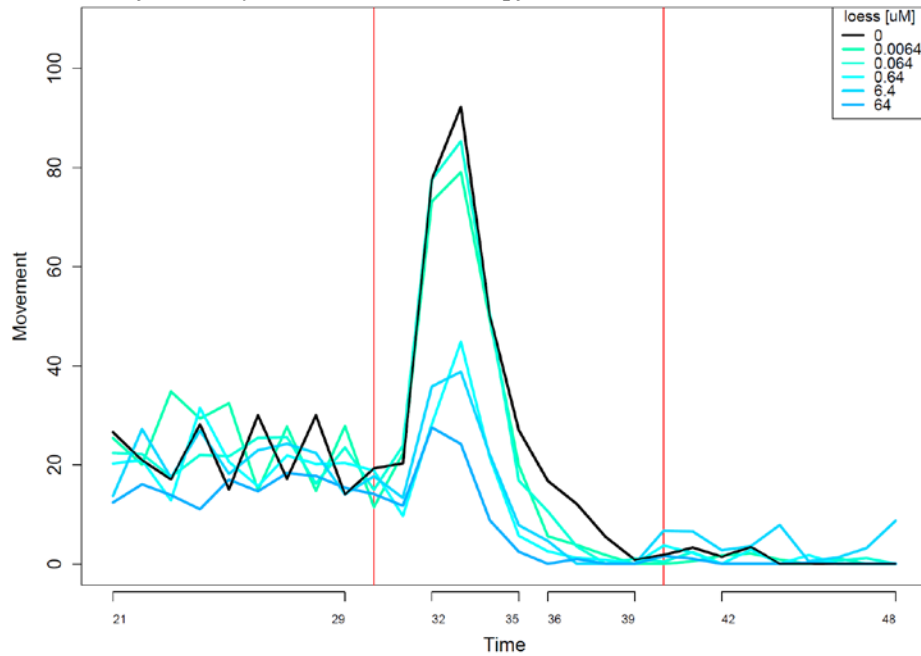

TPP: Zebrafish larvae PMR assay results at 120 hpf

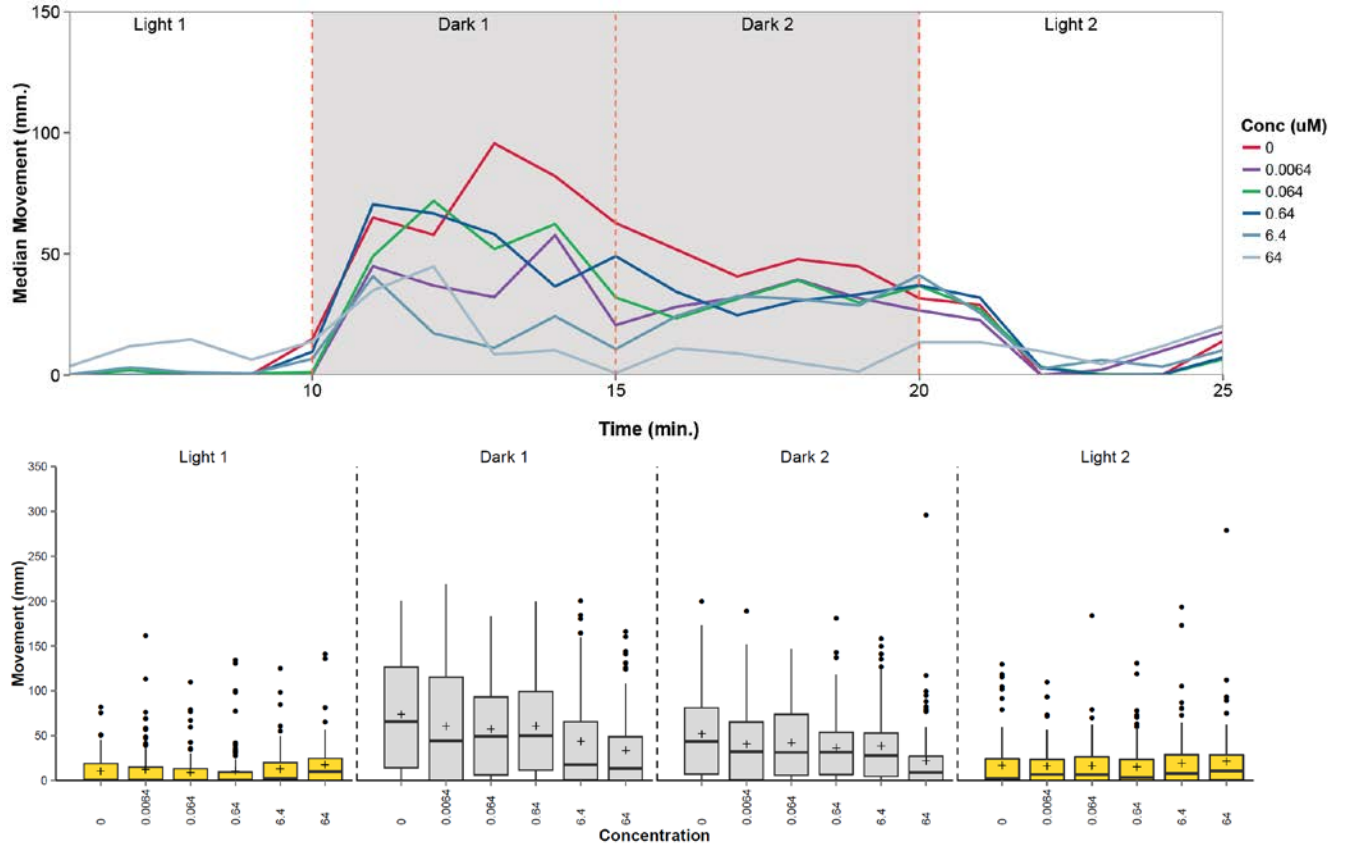

5. CHLORINATED PHOSPHATE ESTER (CPE) FLAME RETARDANTS

Bis (2-chloropropyl) 1-carboxyethyl phosphate (BCPCP)

BCPCP: Zebrafish Mortality and Malformations at 24 and 120 hpf

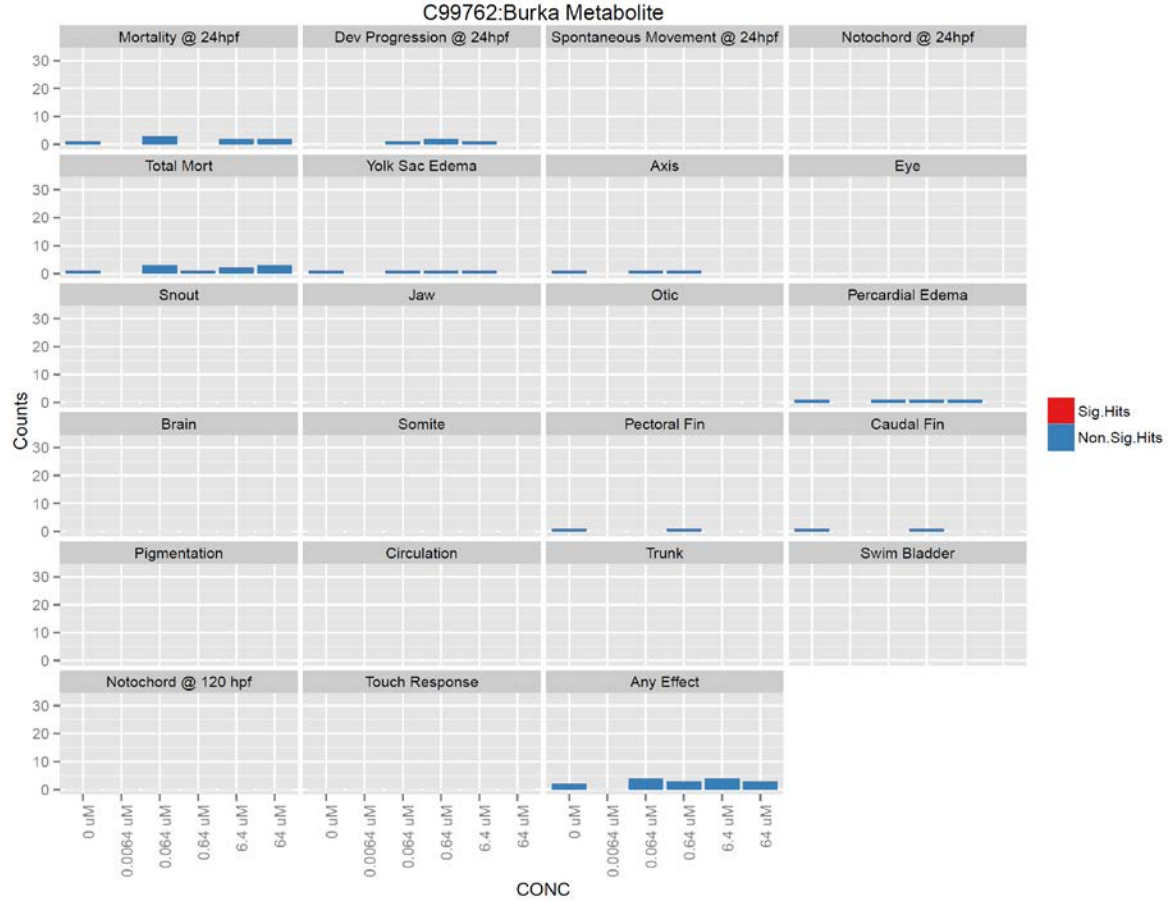

BCPCP: Zebrafish embryo PRAT results at 24 hpf

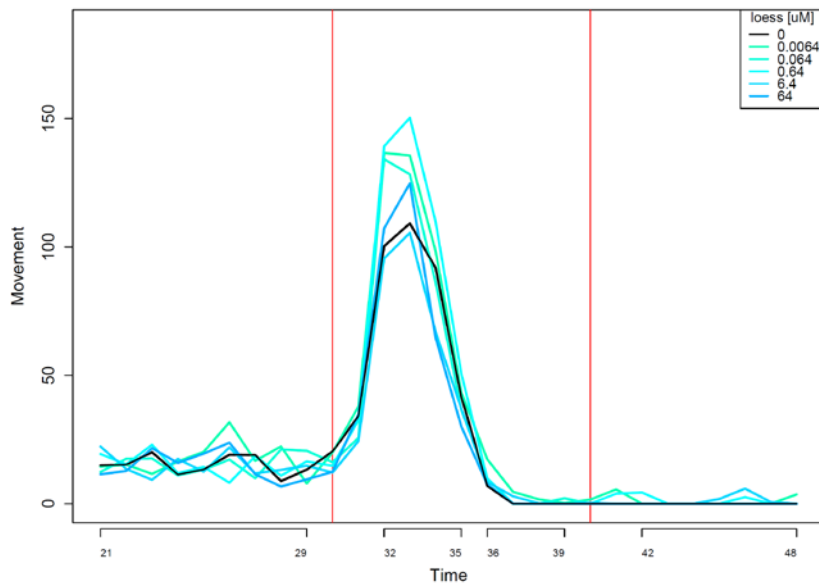

*BCPCP: Zebrafish larvae PMR assay results at 120 hpf*

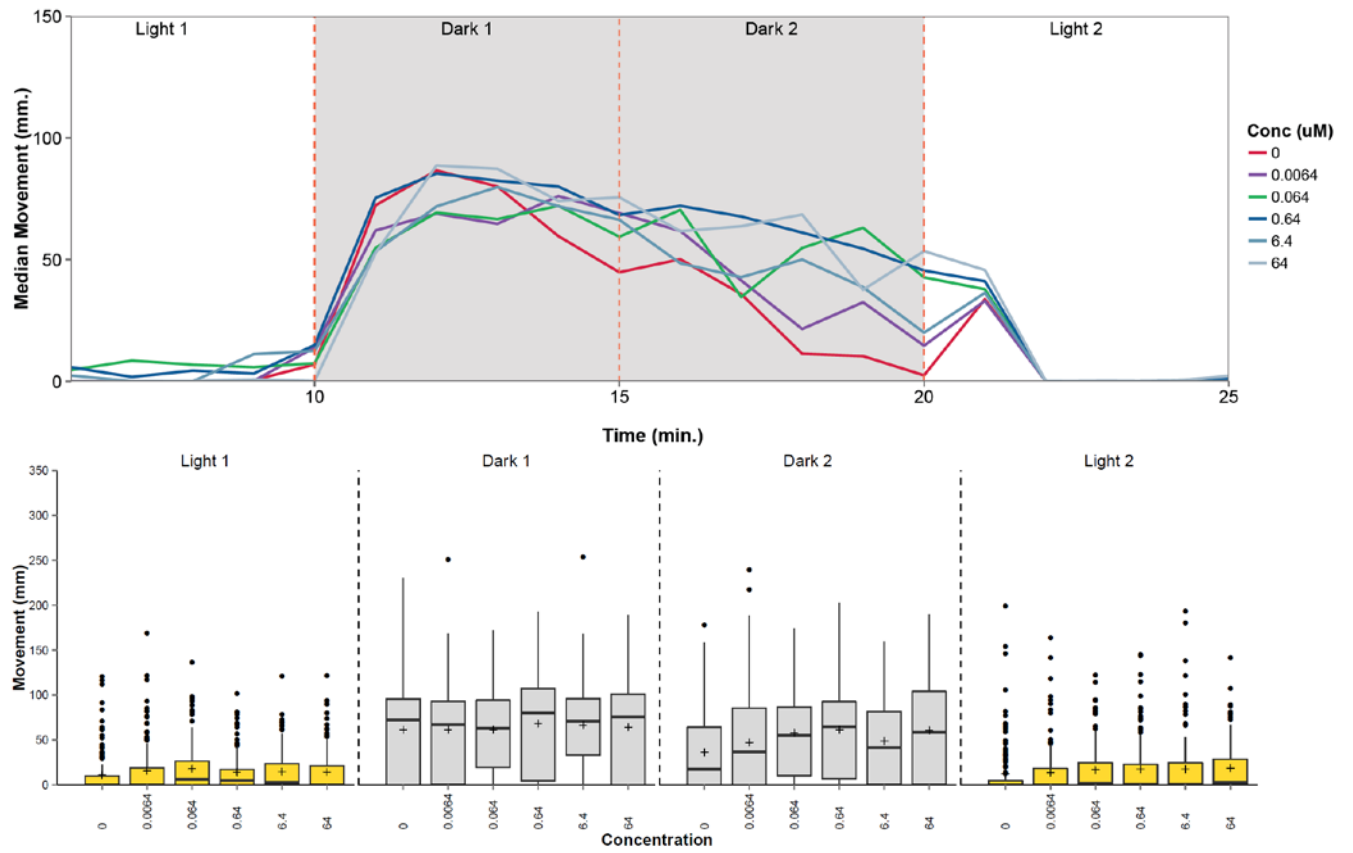

**Bis (2-chloropropyl) phosphate (BCPP)**

***BCPP: Zebrafish Mortality and Malformations at 24 and 120 hpf***

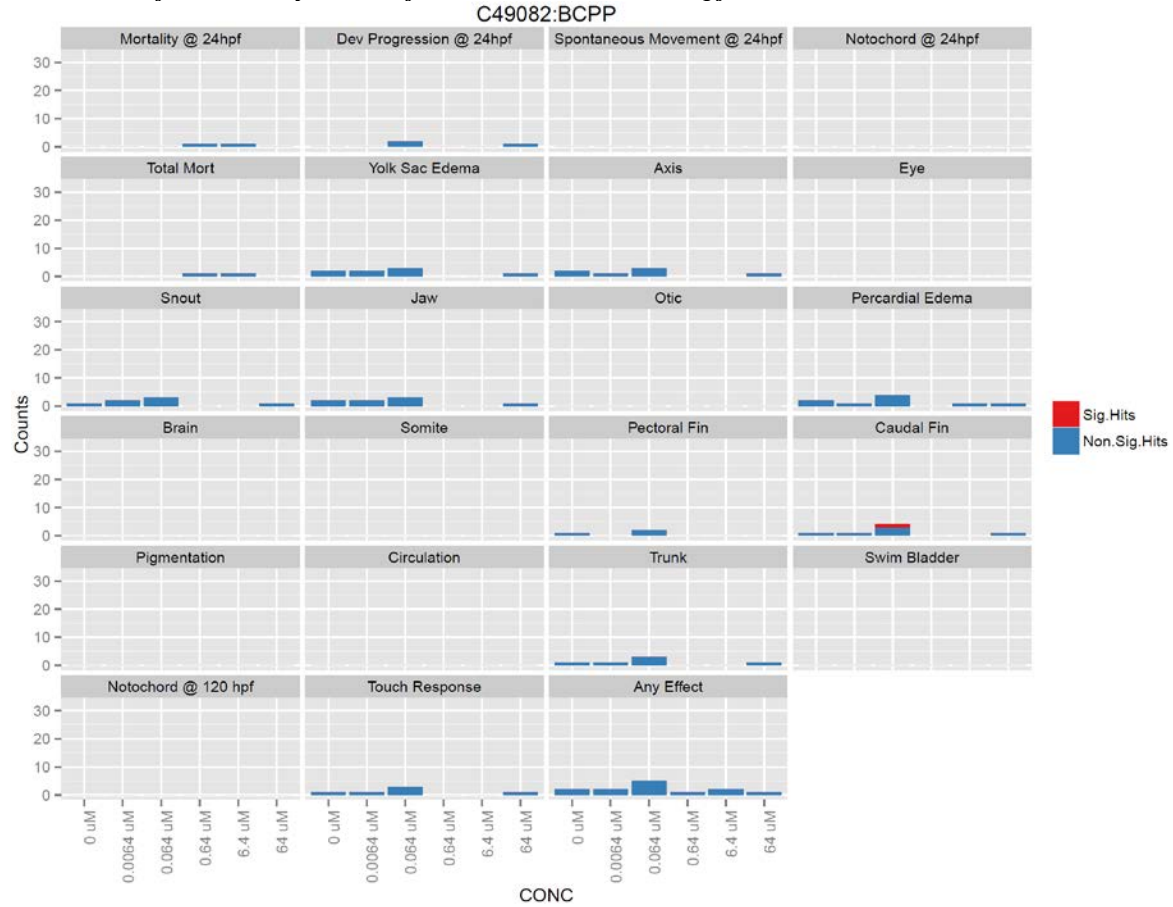

***BCPP: Zebrafish embryo PRAT results at 24 hpf***

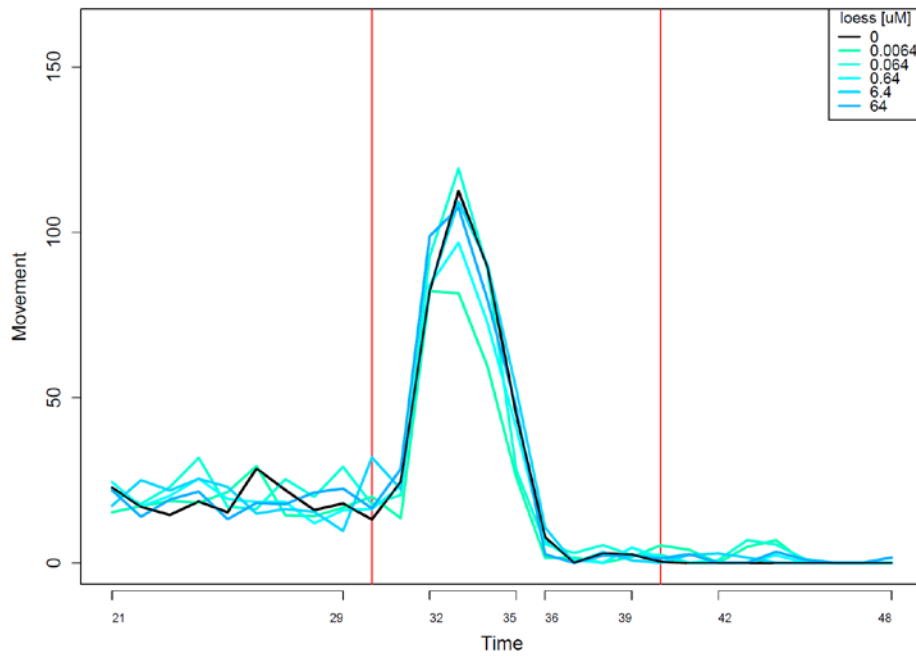

*BCPP: Zebrafish larvae PMR assay results at 120 hpf*

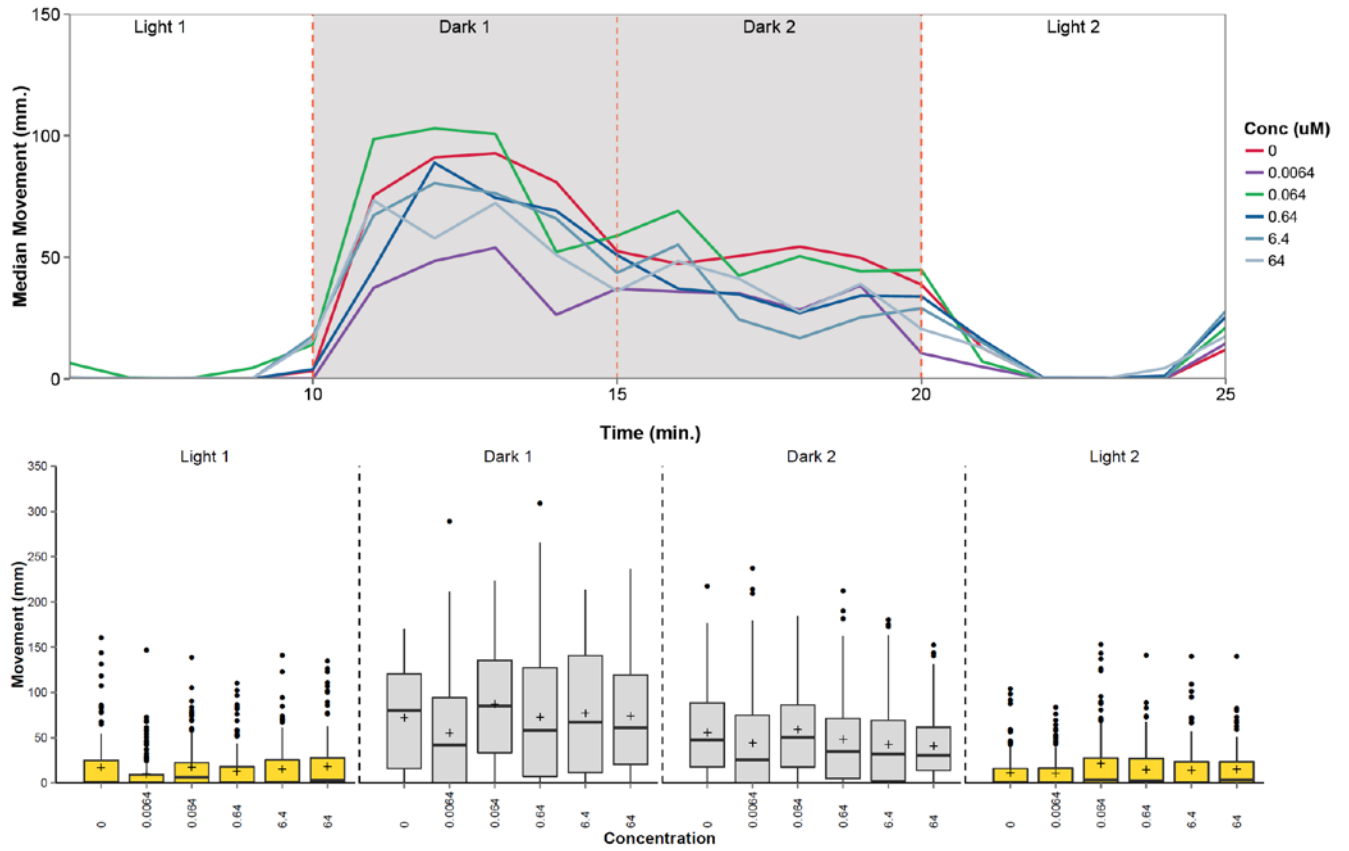



**Bis(1,3-dichloro-2-propyl)phosphate (BDCPP)**

***BDCPP: Zebrafish Mortality and Malformations at 24 and 120 hpf***

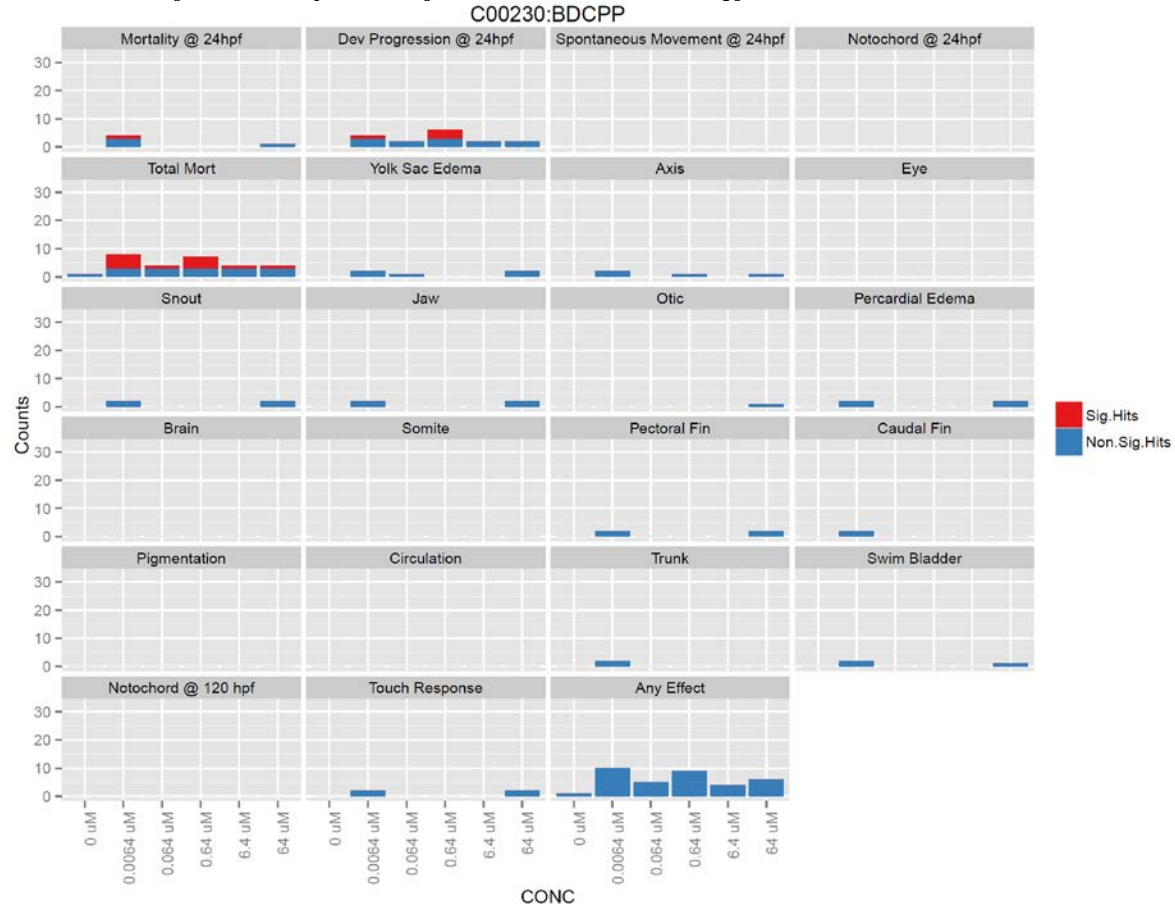

***BDCPP: Zebrafish embryo PRAT results at 24 hpf***

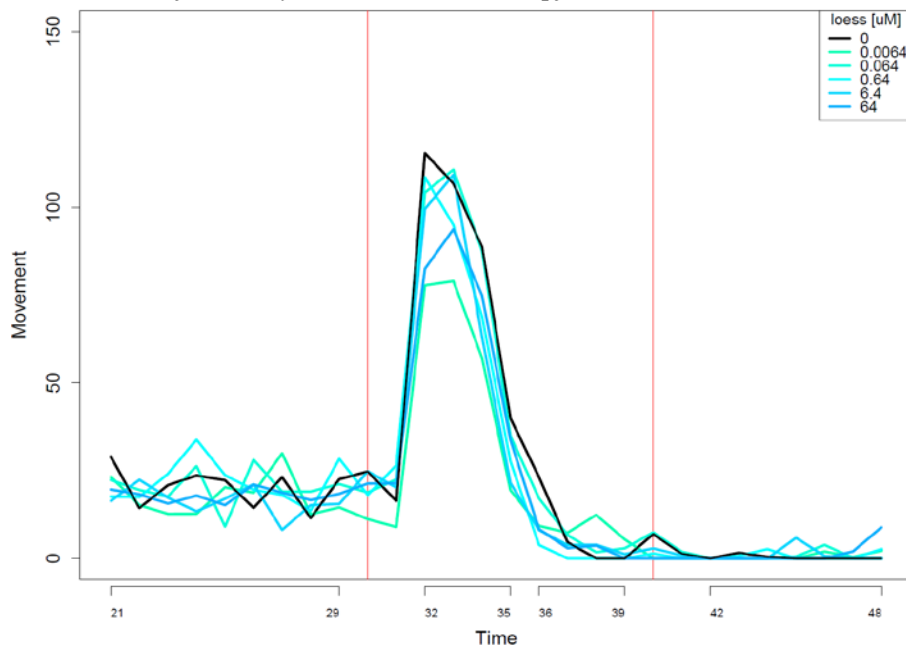

**BDCPP: Zebrafish larvae PMR assay results at 120 hpf**

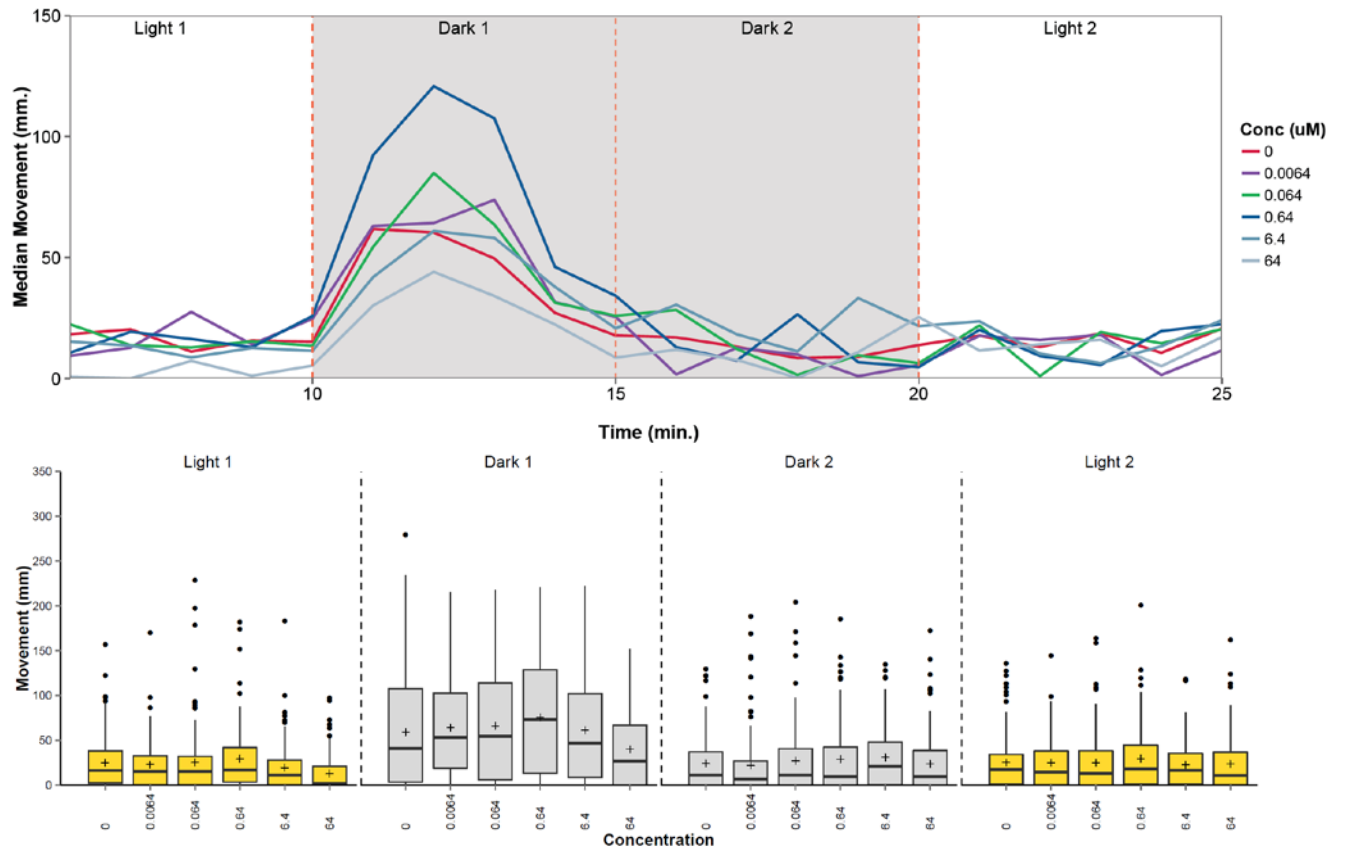

## Dechlorane Plus

### Dechlorane: Zebrafish Mortality and Malformations at 24 and 120 hpf

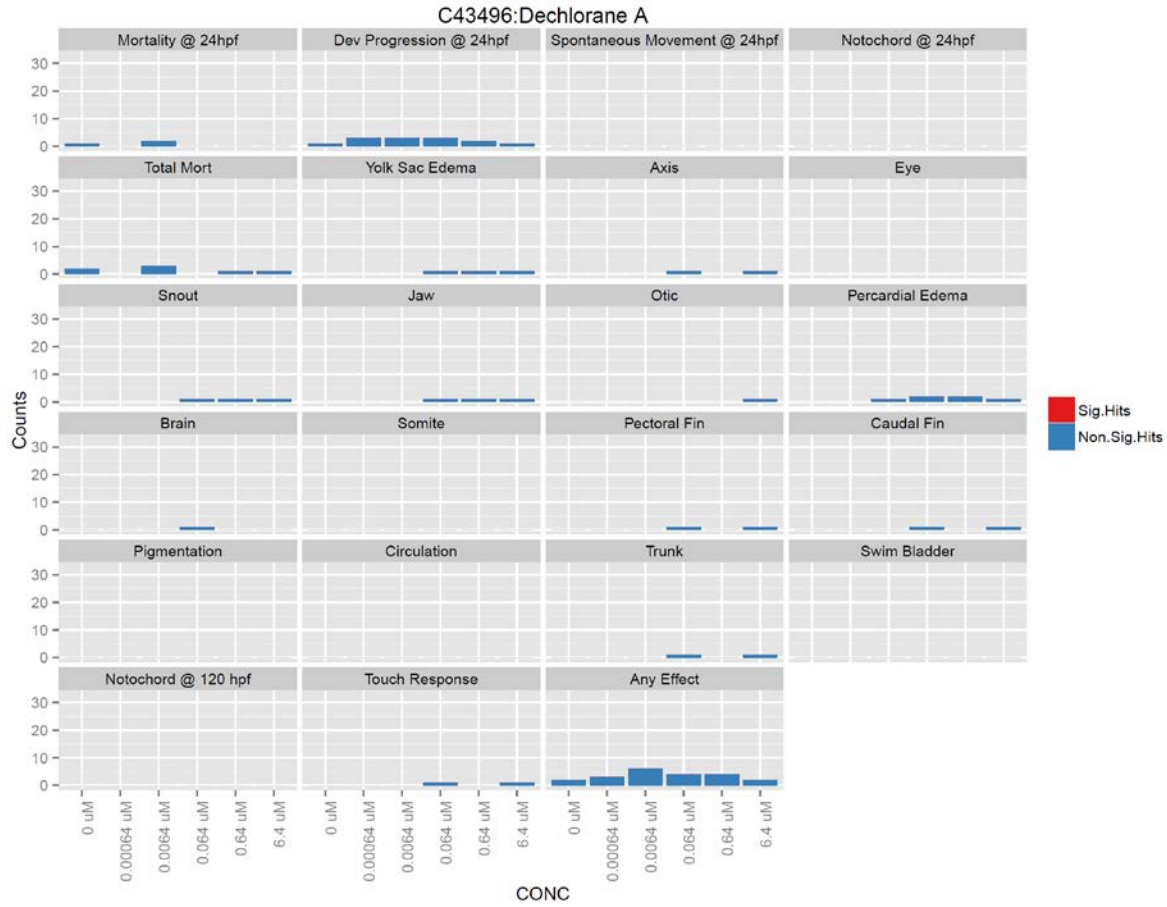

### Dechlorane: Zebrafish embryo PRAT results at 24 hpf

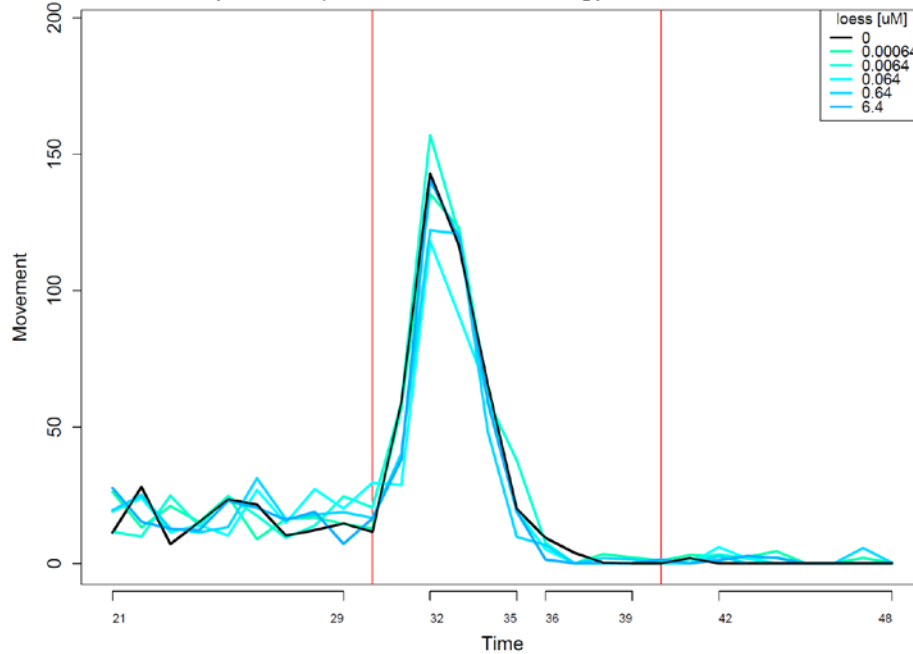

*Dechlorane: Zebrafish larvae PMR assay results at 120 hpf*

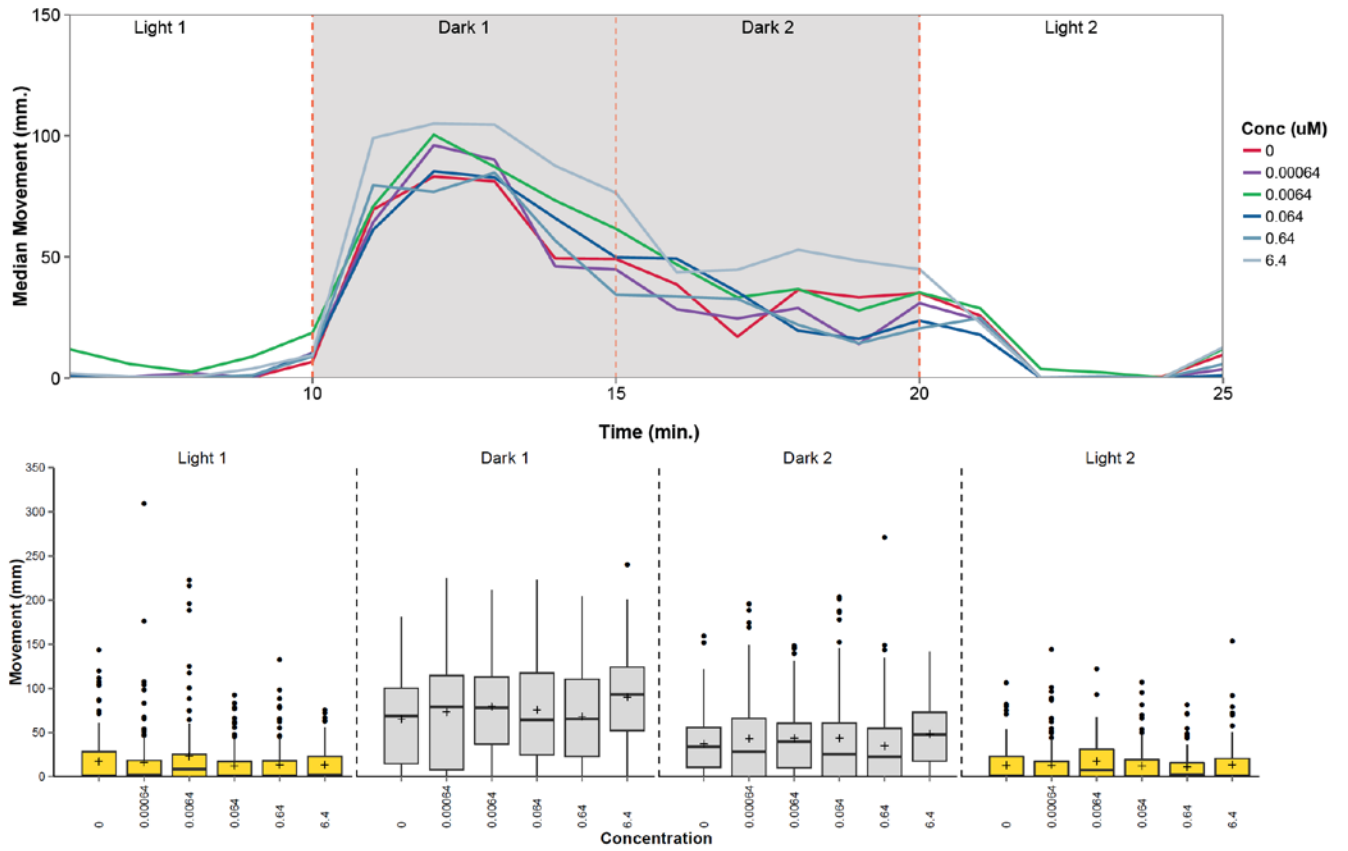

**Mono (2-chloropropyl) phosphate (MCP)**

***MCP: Zebrafish Mortality and Malformations at 24 and 120 hpf***

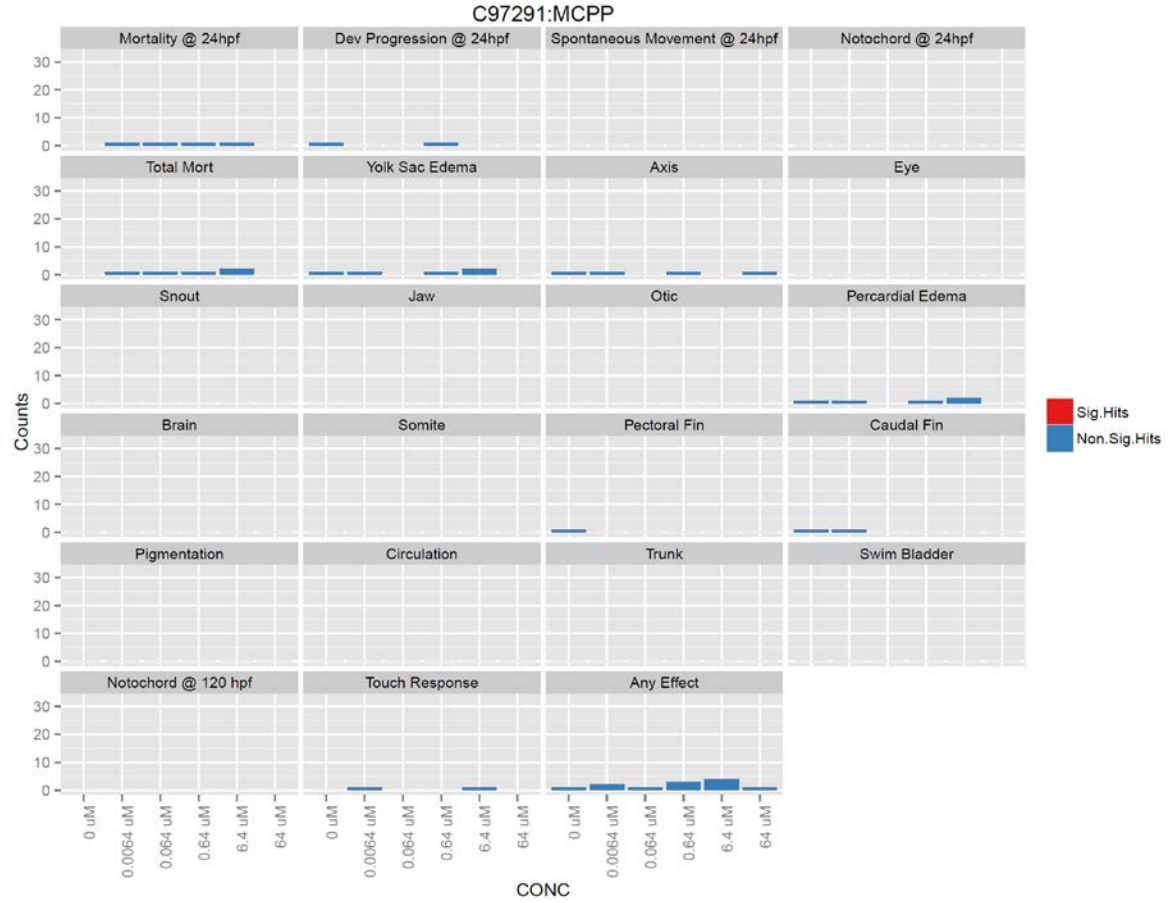

***MCP: Zebrafish embryo PRAT results at 24 hpf***

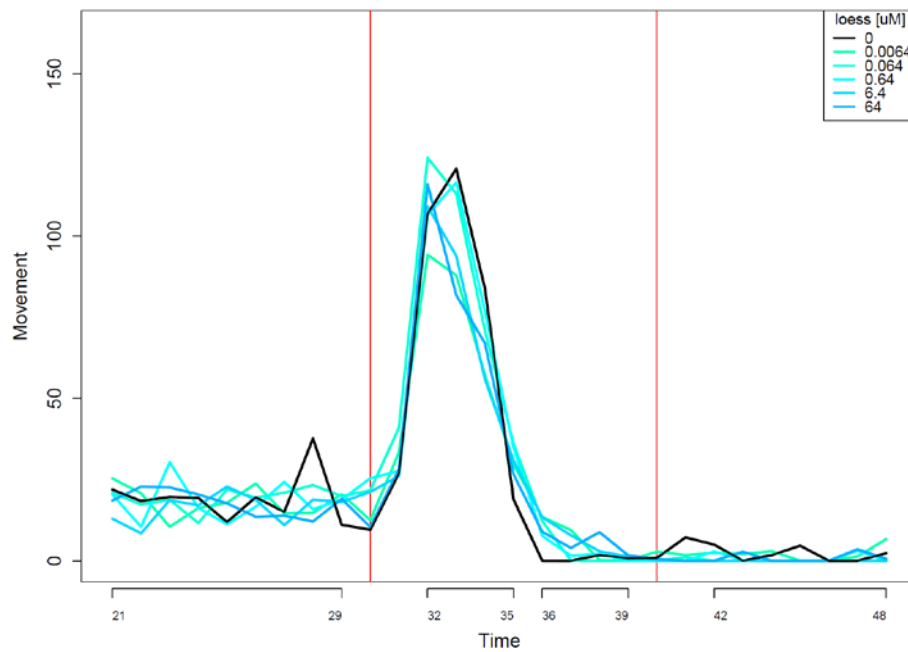

*MCPP: Zebrafish larvae PMR assay results at 120 hpf*

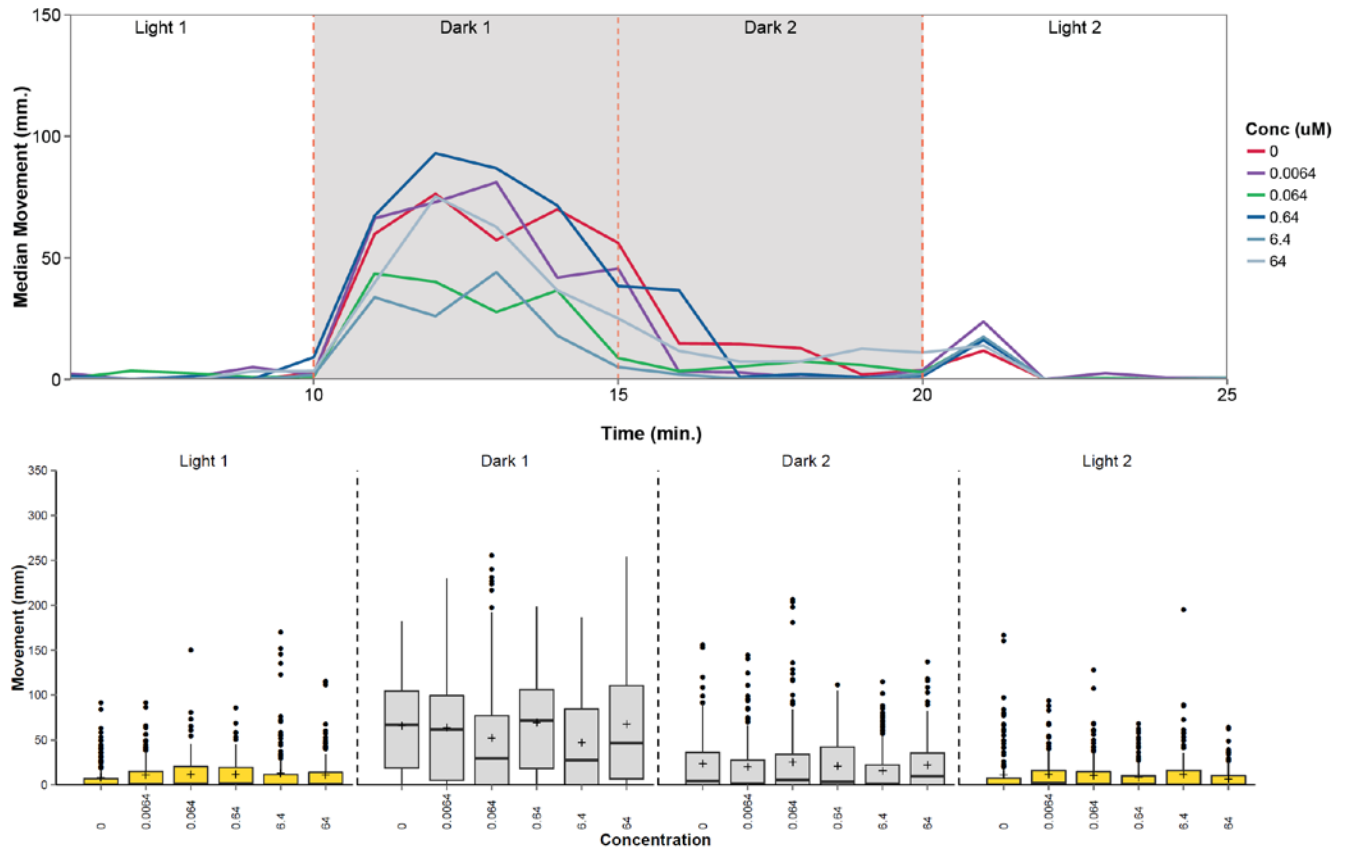

**Tris (2-chloroethyl) phosphate (TCEP)**

***TCEP: Zebrafish Mortality and Malformations at 24 and 120 hpf***

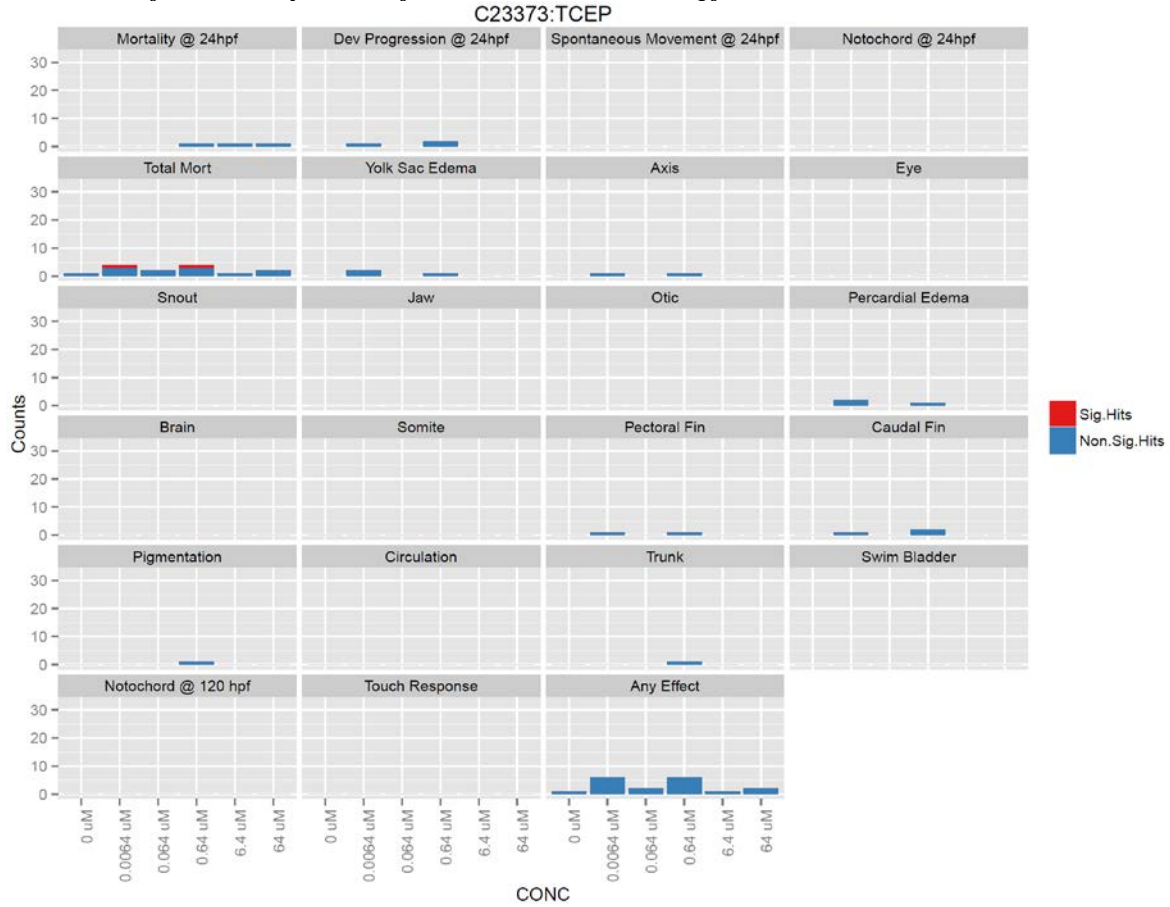

***TCEP: Zebrafish embryo PRAT results at 24 hpf***

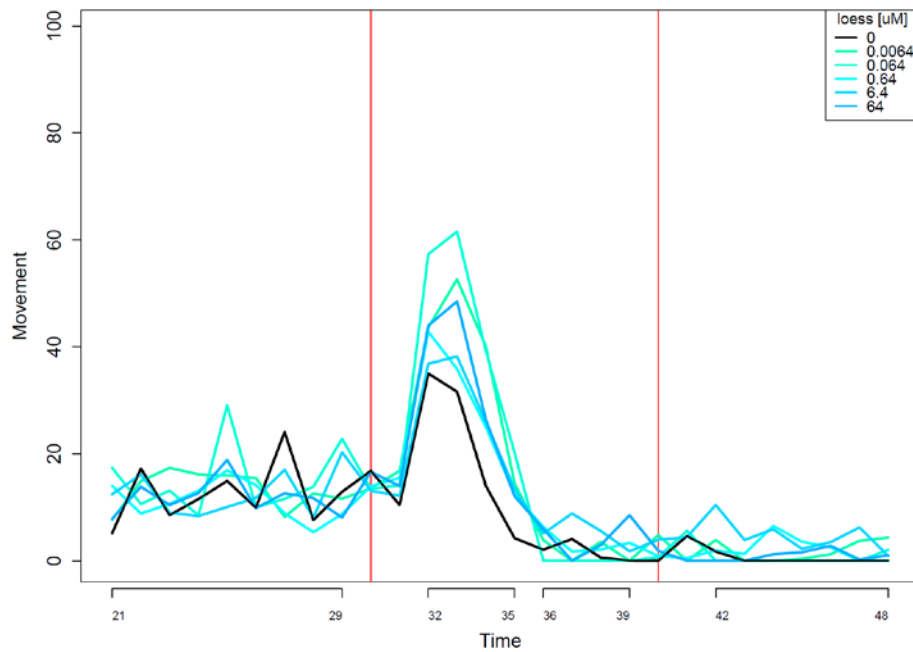

*TCEP: Zebrafish larvae PMR assay results at 120 hpf*

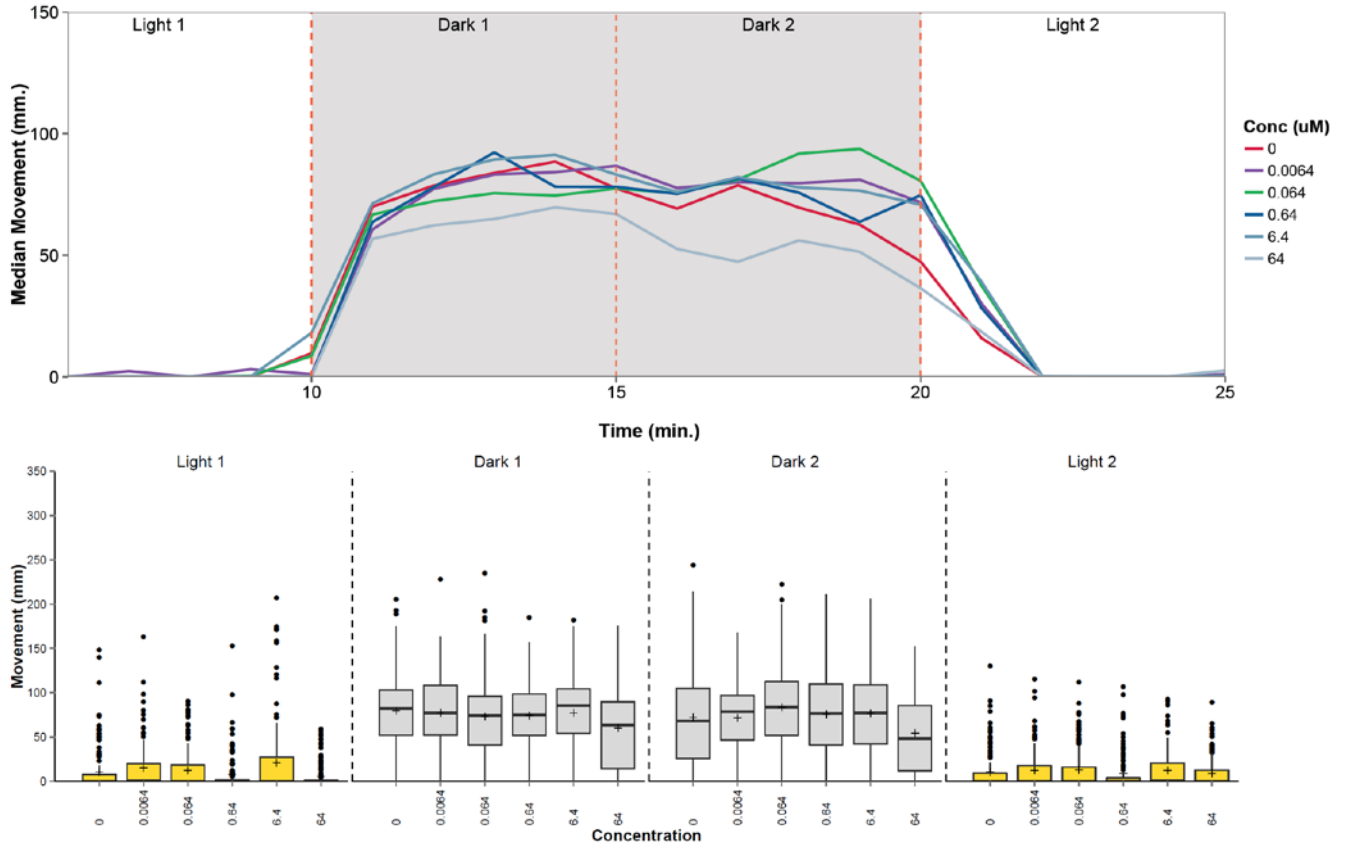



**Tris (1-chloropropyl) phosphate (TCPP)**

***TCPP: Zebrafish Mortality and Malformations at 24 and 120 hpf***

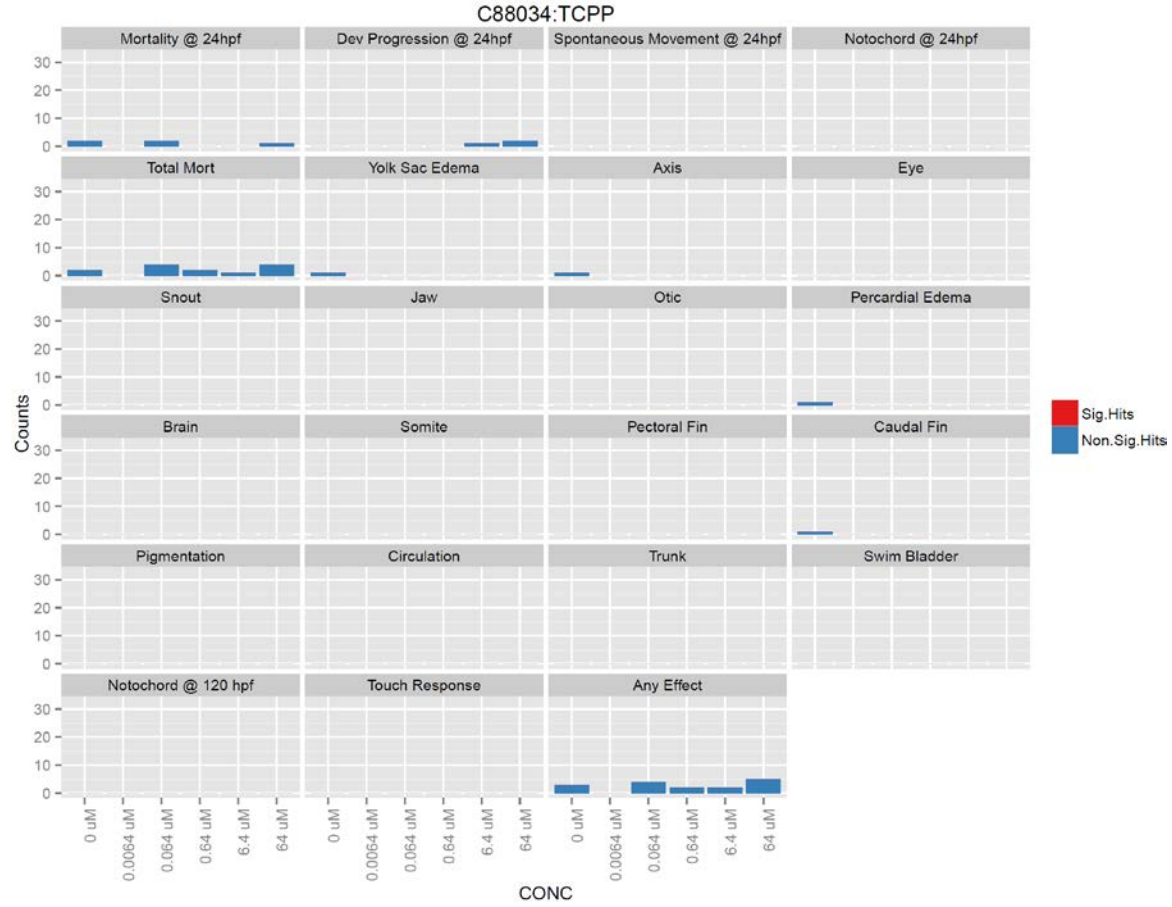

***TCPP: Zebrafish embryo PRAT results at 24 hpf***

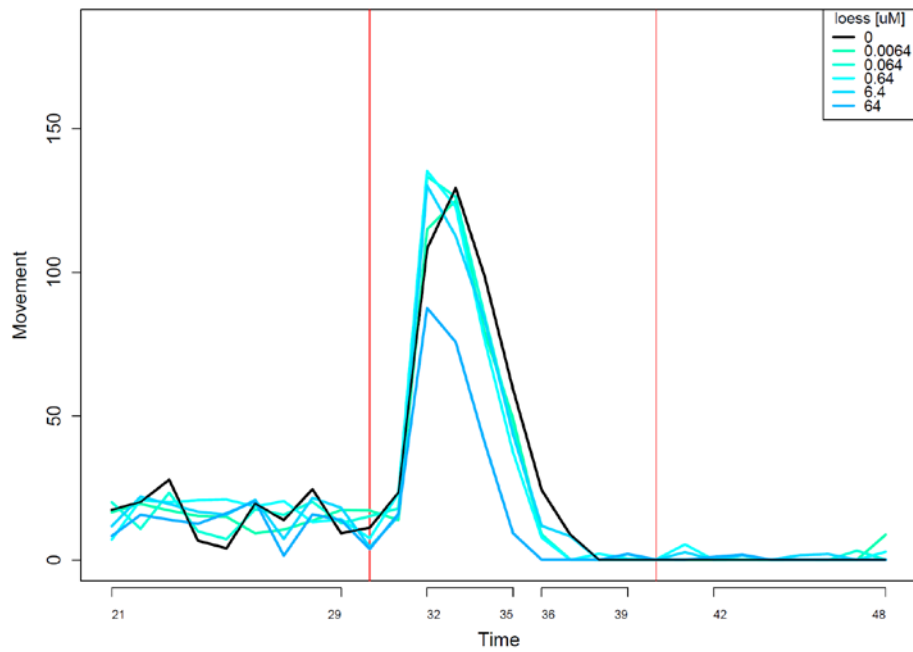

*TCPP: Zebrafish larvae PMR assay results at 120 hpf*

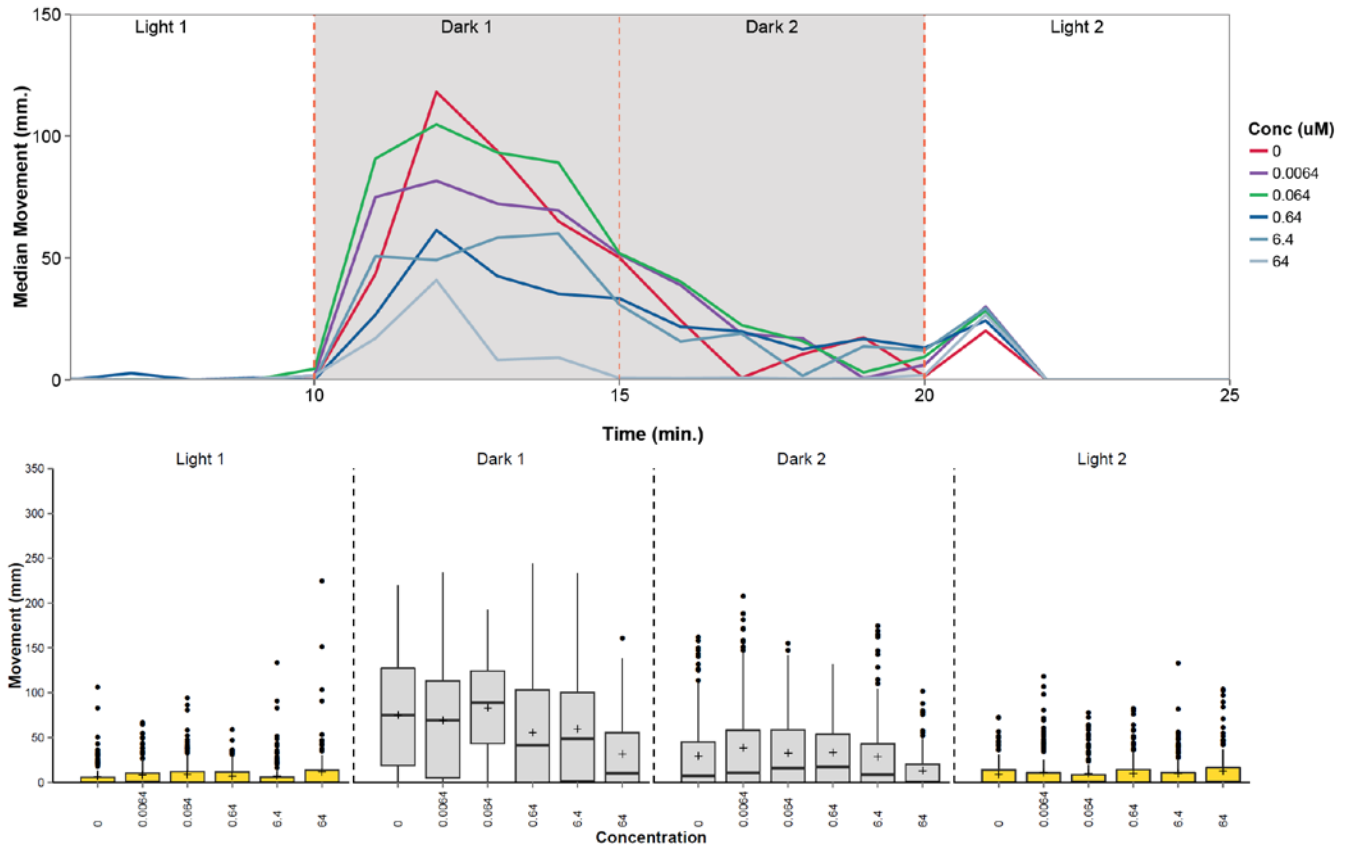



**2,4,6-TBP: Zebrafish larvae PMR assay results at 120 hpf**

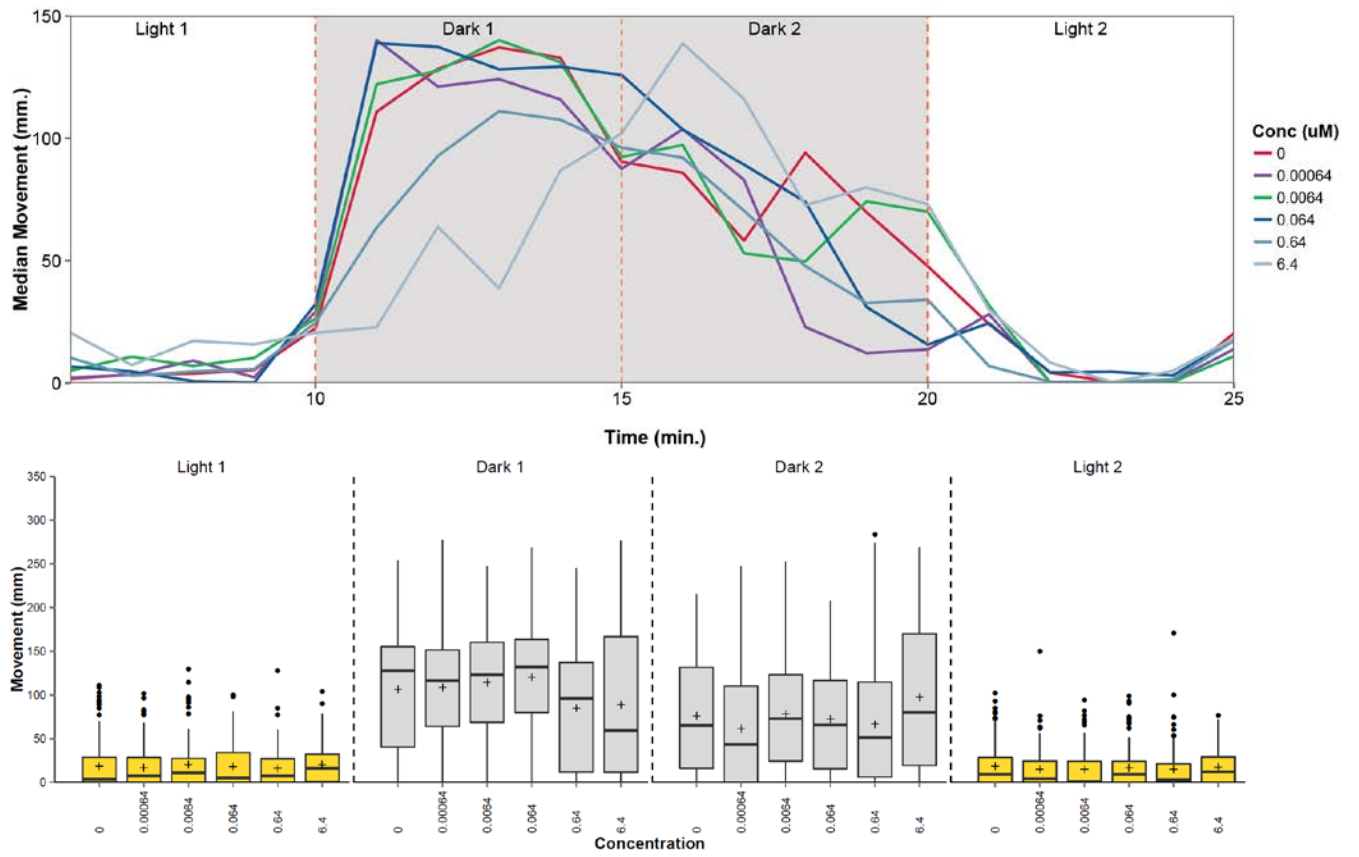

**3-Hydroxy-2,2',4,4'-tetraBDE (3-OH-BDE-47)**

***3-OH-BDE-47: Zebrafish Mortality and Malformations at 24 and 120 hpf***

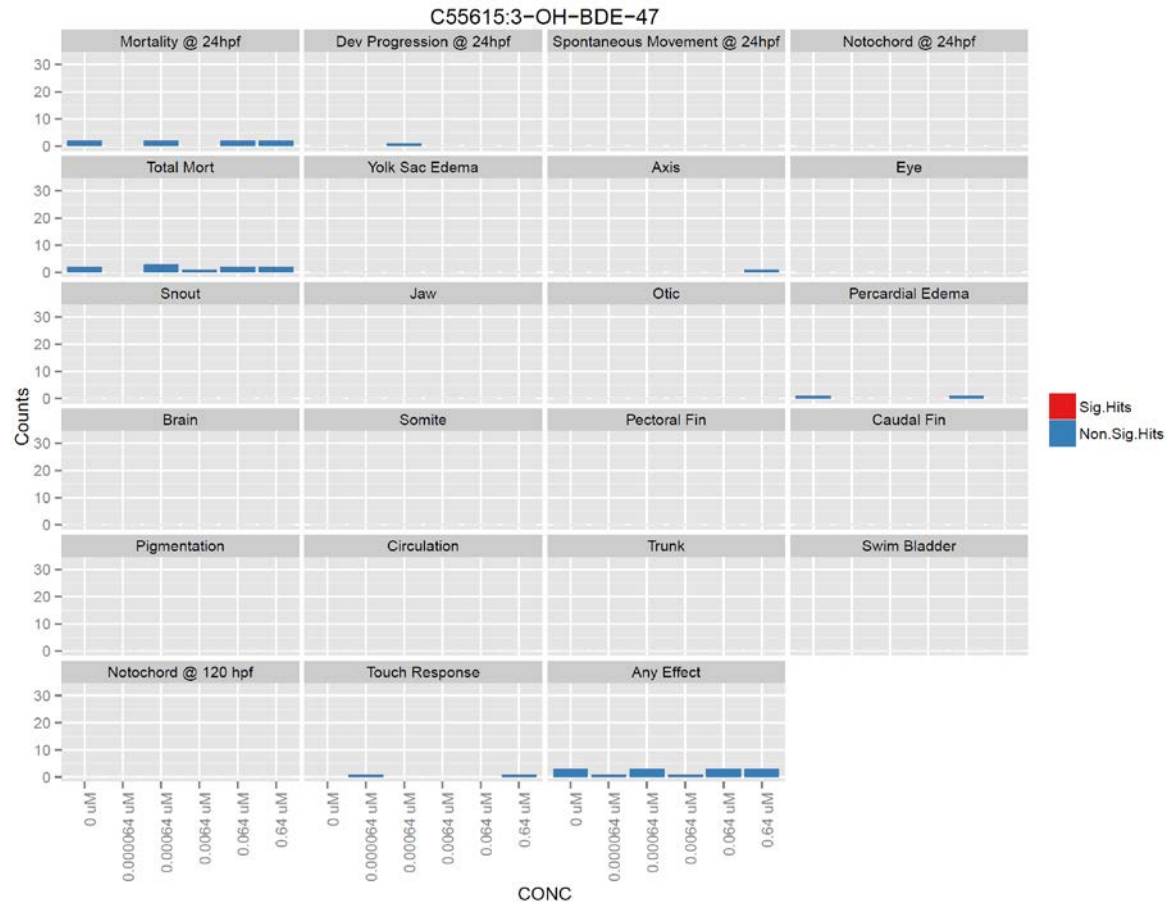

***3-OH-BDE-47: Zebrafish embryo PRAT results at 24 hpf***

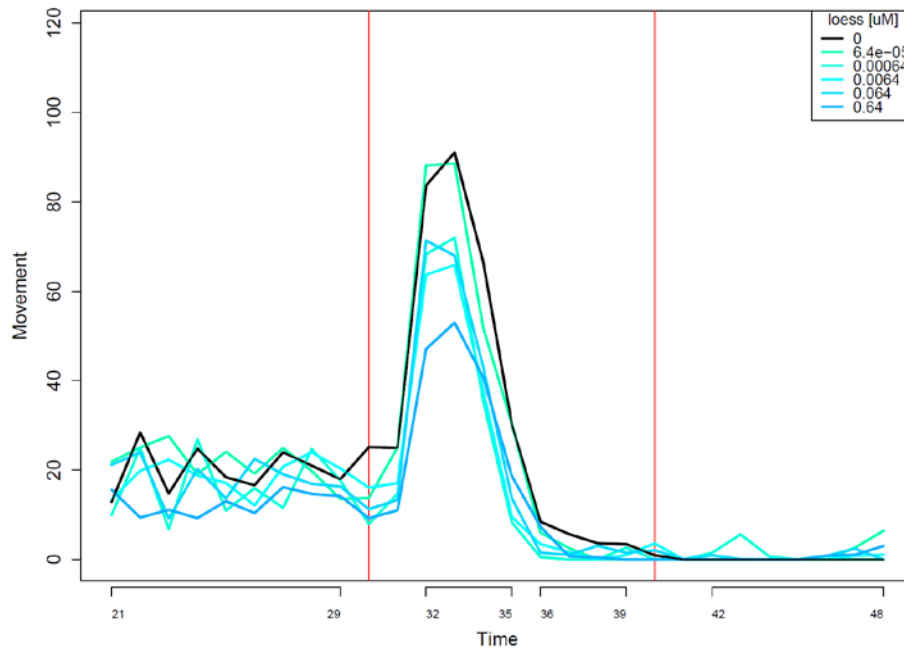

**3-OH-BDE-47: Zebrafish larvae PMR assay results at 120 hpf**

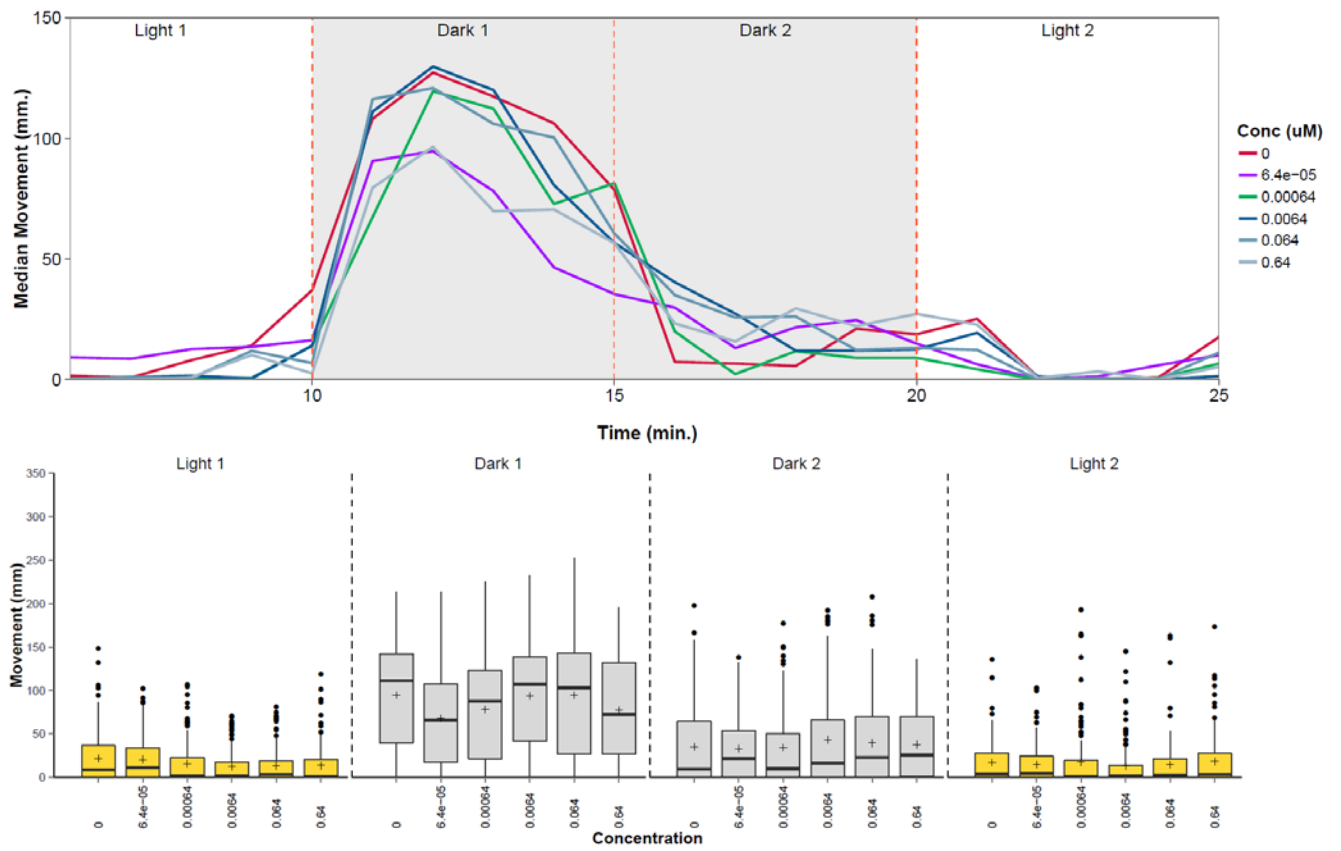

**5-Hydroxy-2,2',4,4'-tetraBDE (5-OH-BDE-47)**

**5-OH-BDE-47: Zebrafish Mortality and Malformations at 24 and 120 hpf**

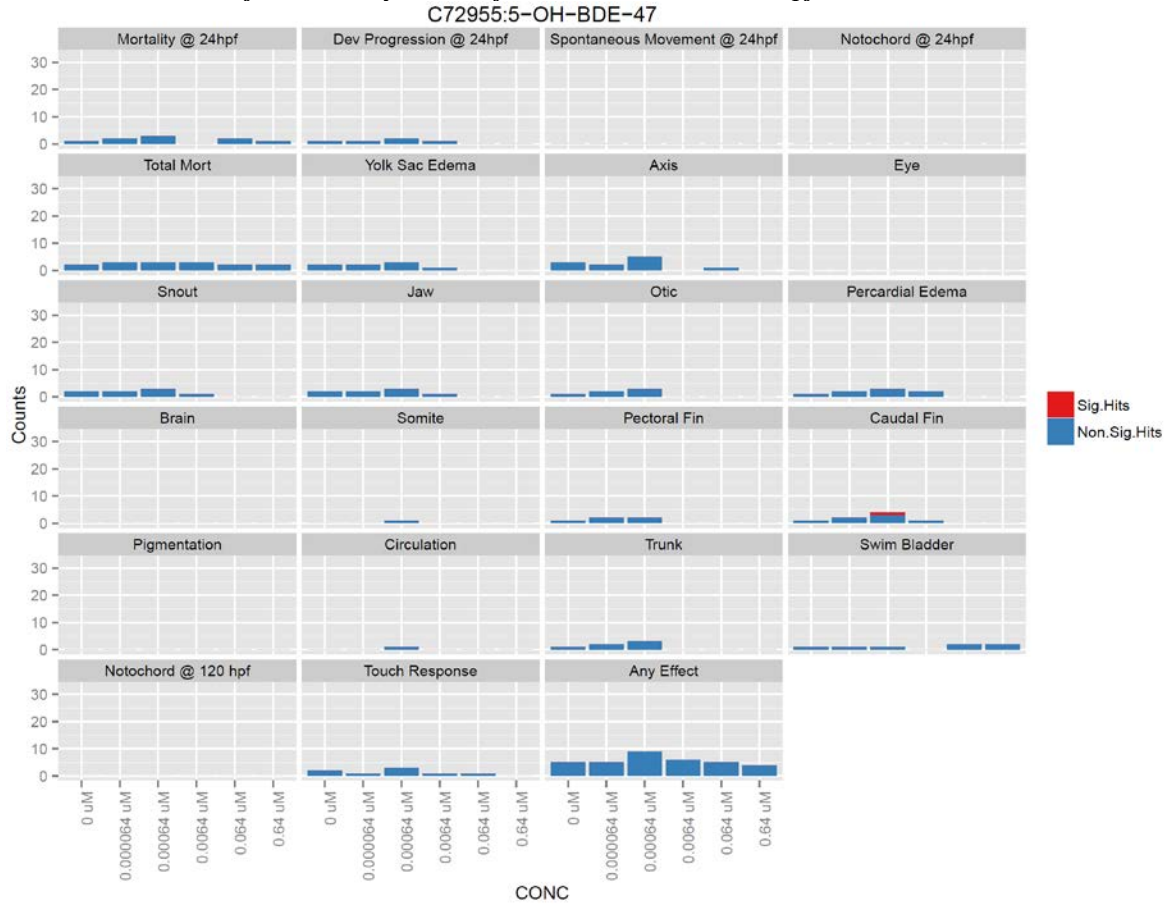

**5-OH-BDE-47: Zebrafish embryo PRAT results at 24 hpf**

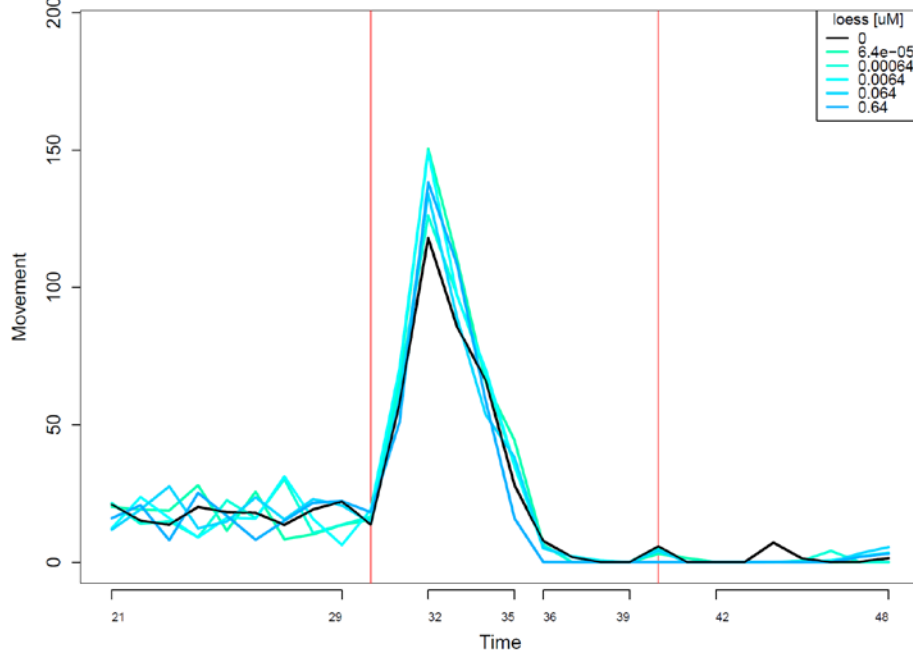

*5-OH-BDE-47*: Zebrafish larvae PMR assay results at 120 hpf

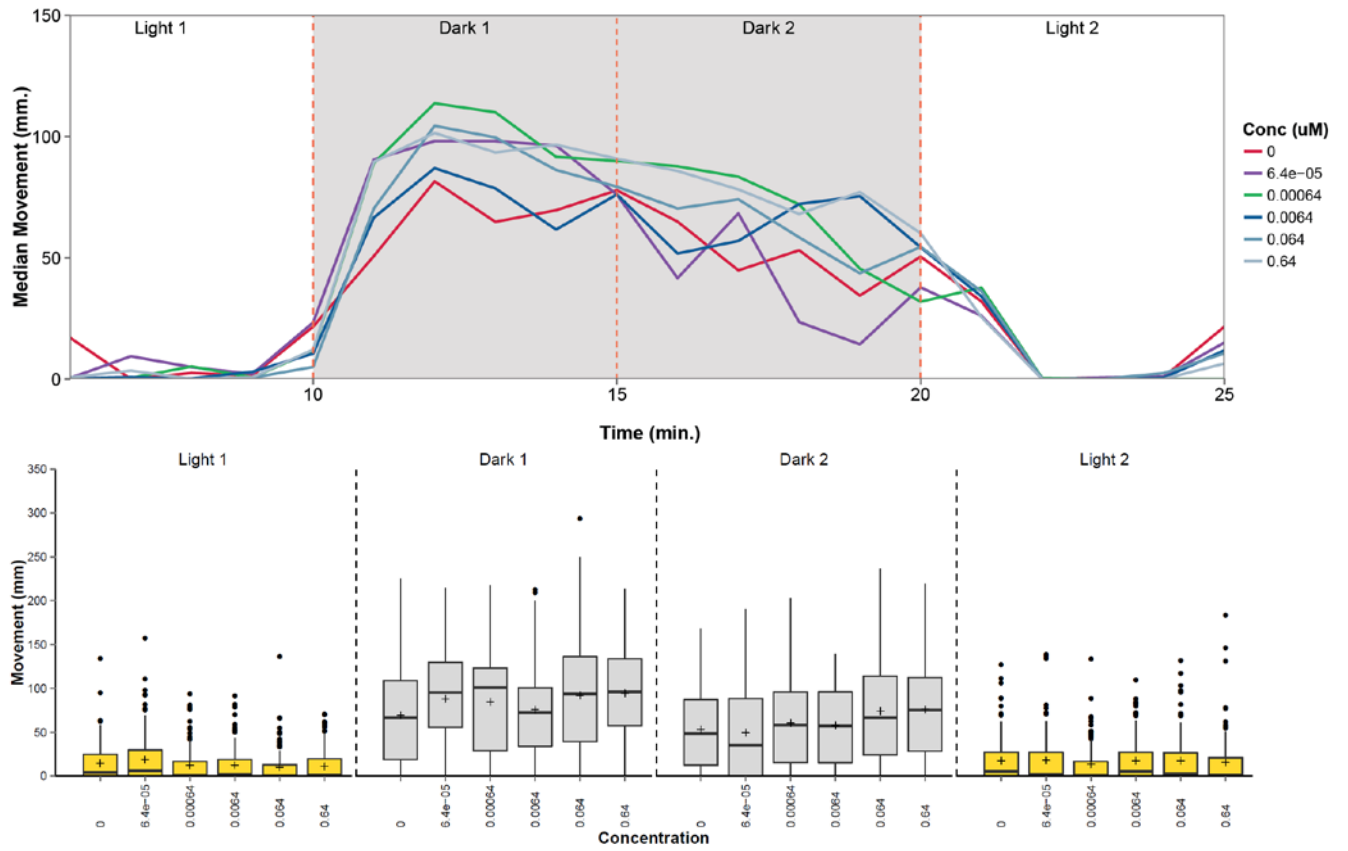



**6-Hydroxy-2,2',4,4'-tetraBDE (6-OH-BDE-47)**

**6-OH-BDE-47: Zebrafish Mortality and Malformations at 24 and 120 hpf**

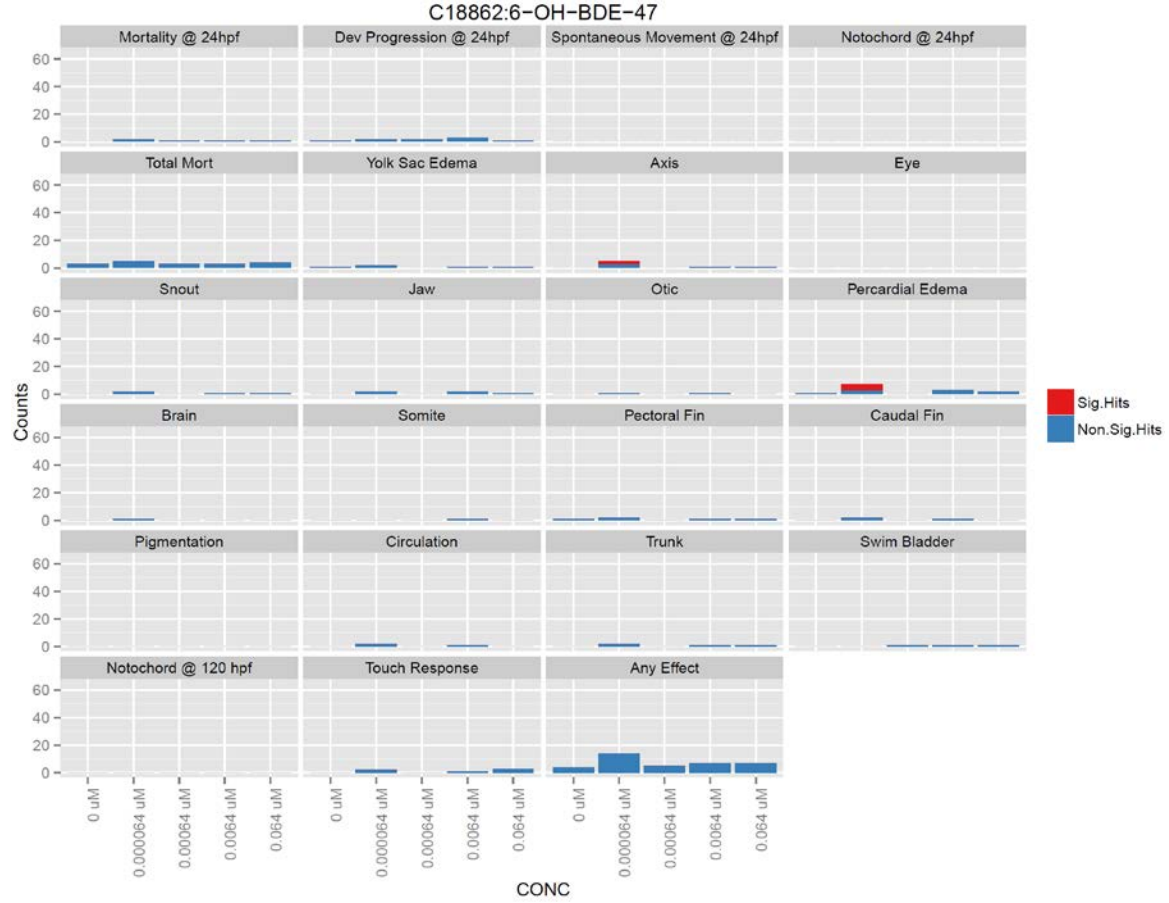

**6-OH-BDE-47: Zebrafish embryo PRAT results at 24 hpf**

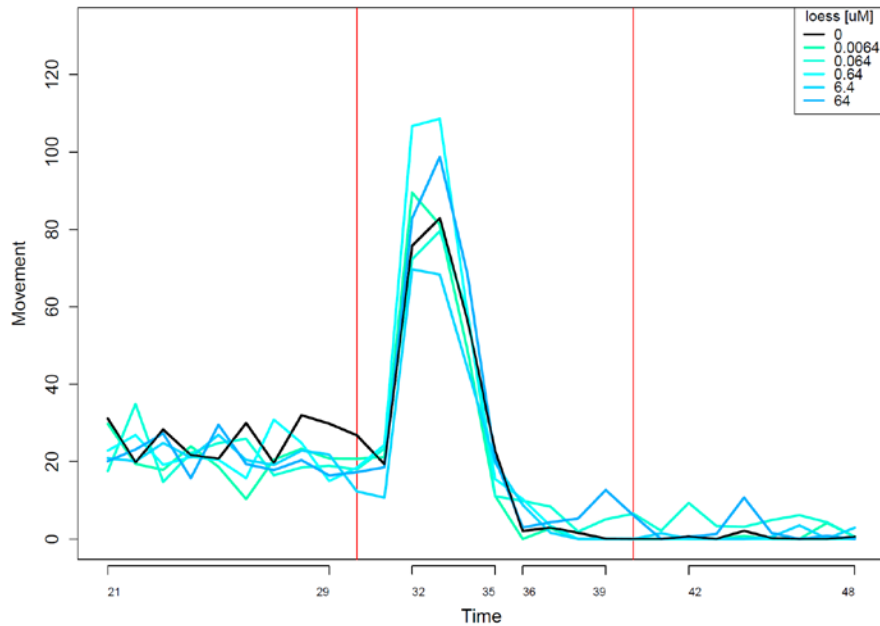

6-OH-BDE-47: Zebrafish larvae PMR assay results at 120 hpf

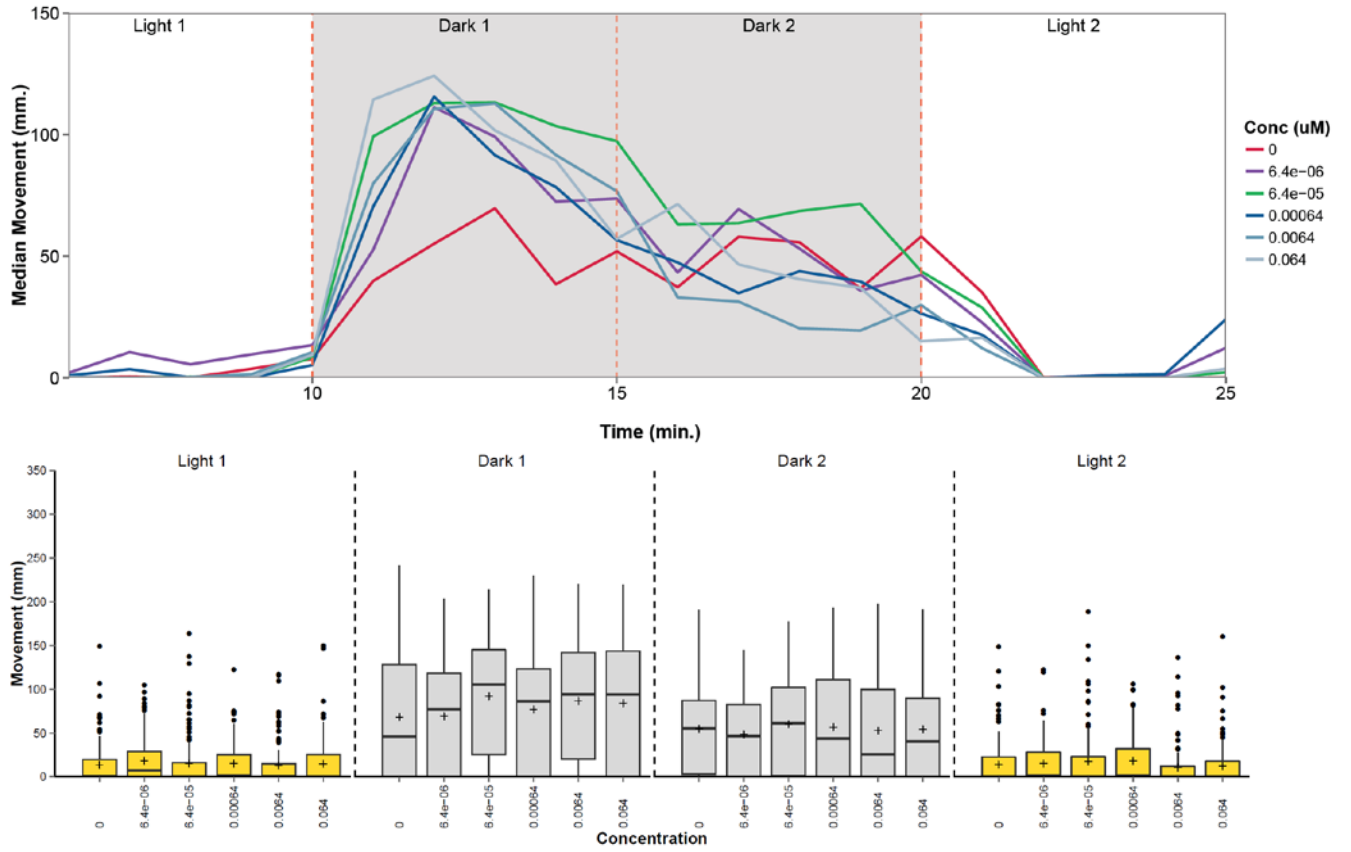

**p-Bromodiphenyl ether (BDE-3)**

***BDE-3: Zebrafish Mortality and Malformations at 24 and 120 hpf***

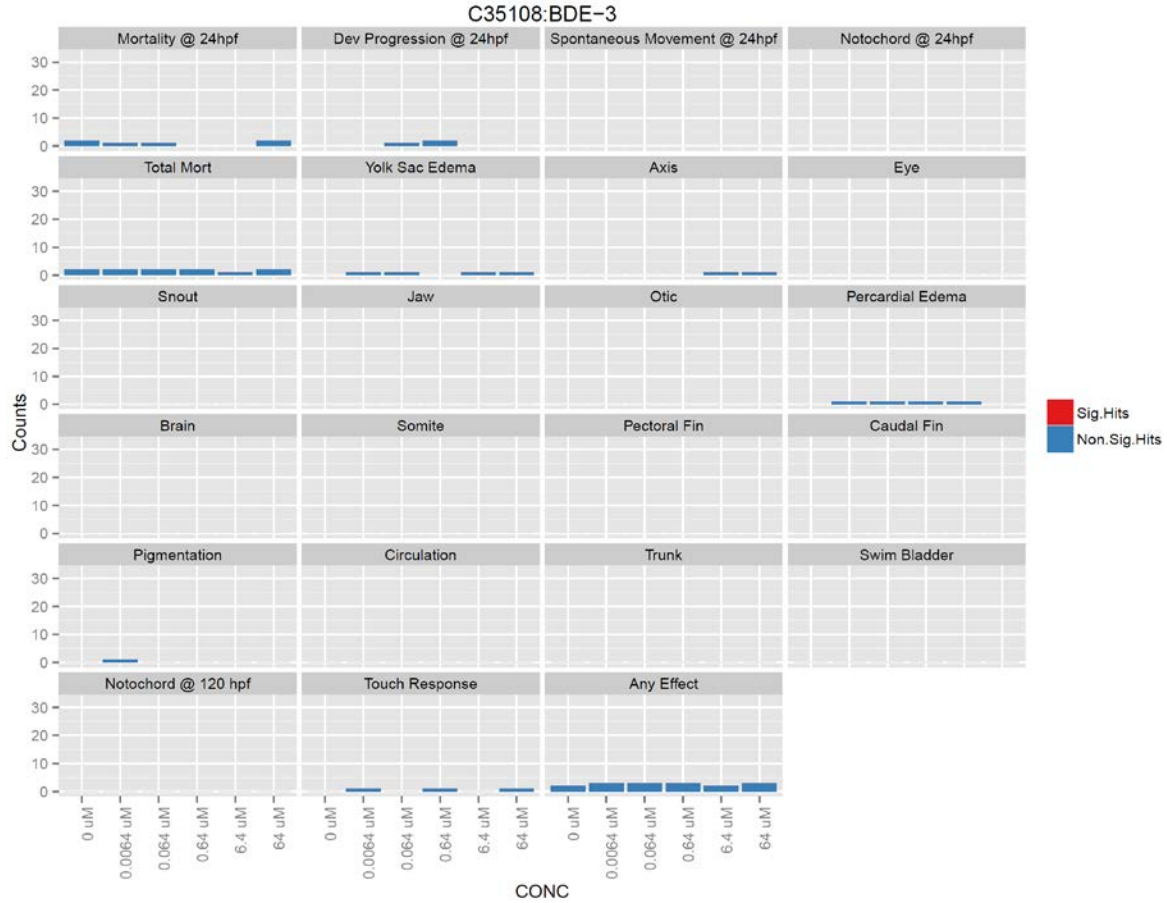

***BDE-3: Zebrafish embryo PRAT results at 24 hpf***

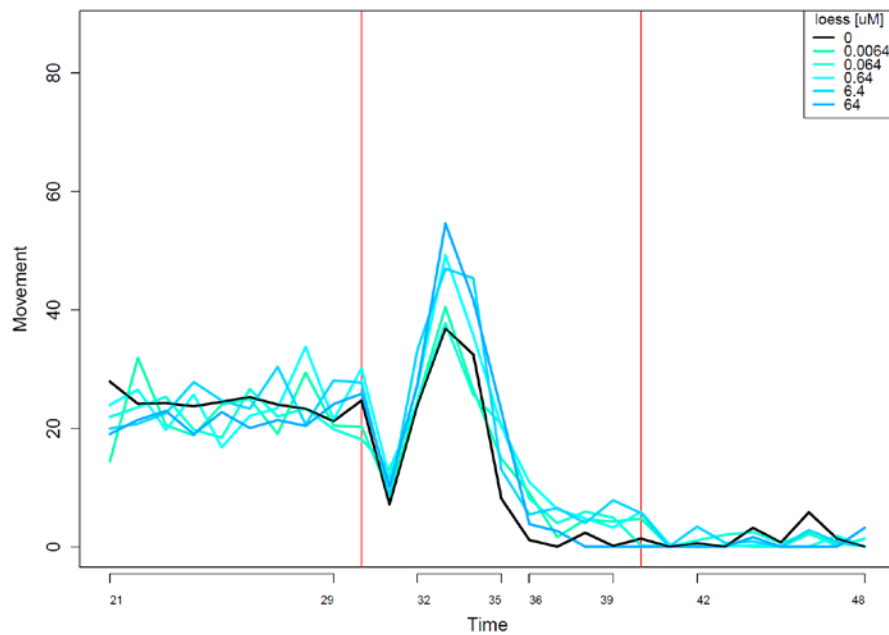

**BDE-3: Zebrafish larvae PMR assay results at 120 hpf**

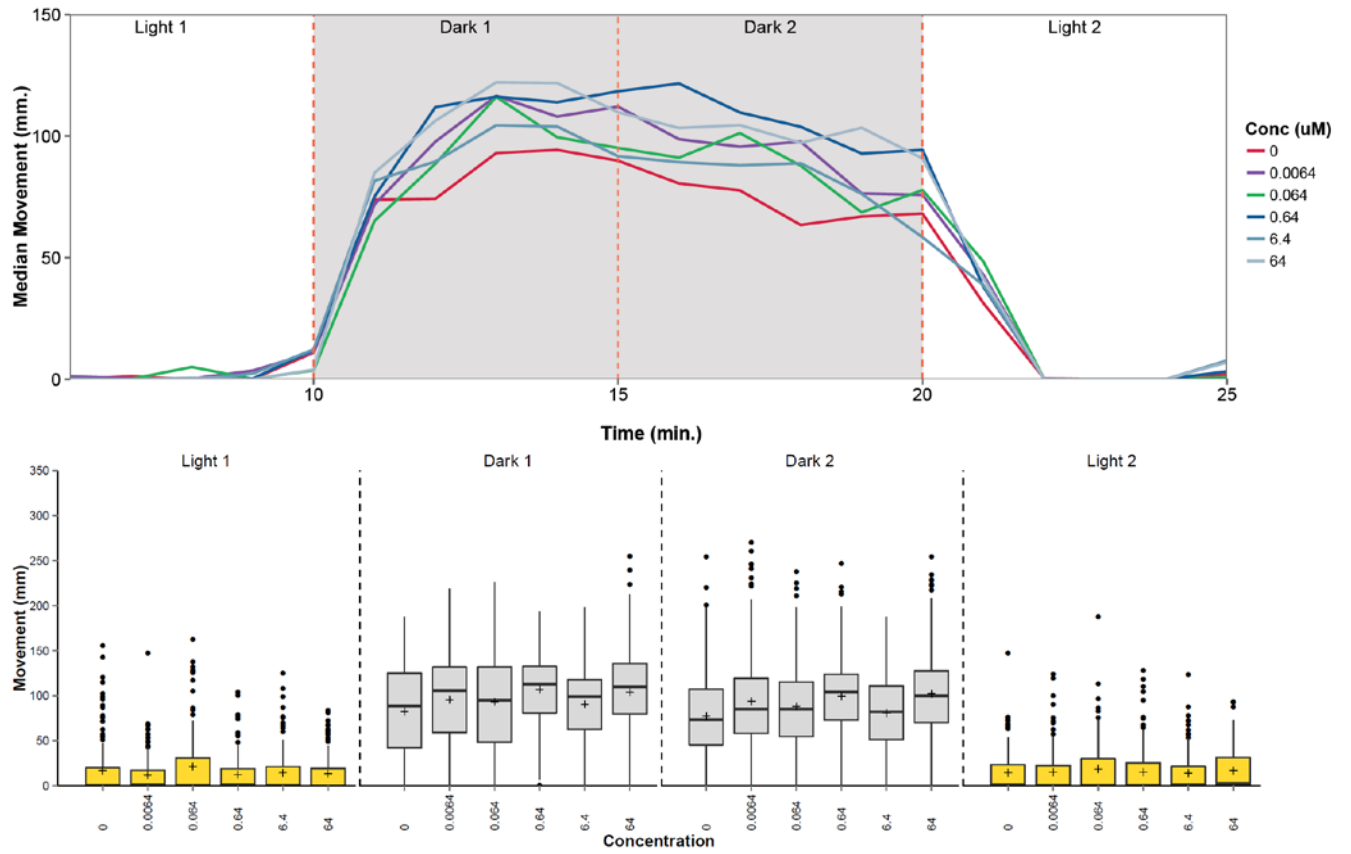

**p,p-Dibromodiphenyl ether (BDE-15)**

***BDE-15: Zebrafish Mortality and Malformations at 24 and 120 hpf***

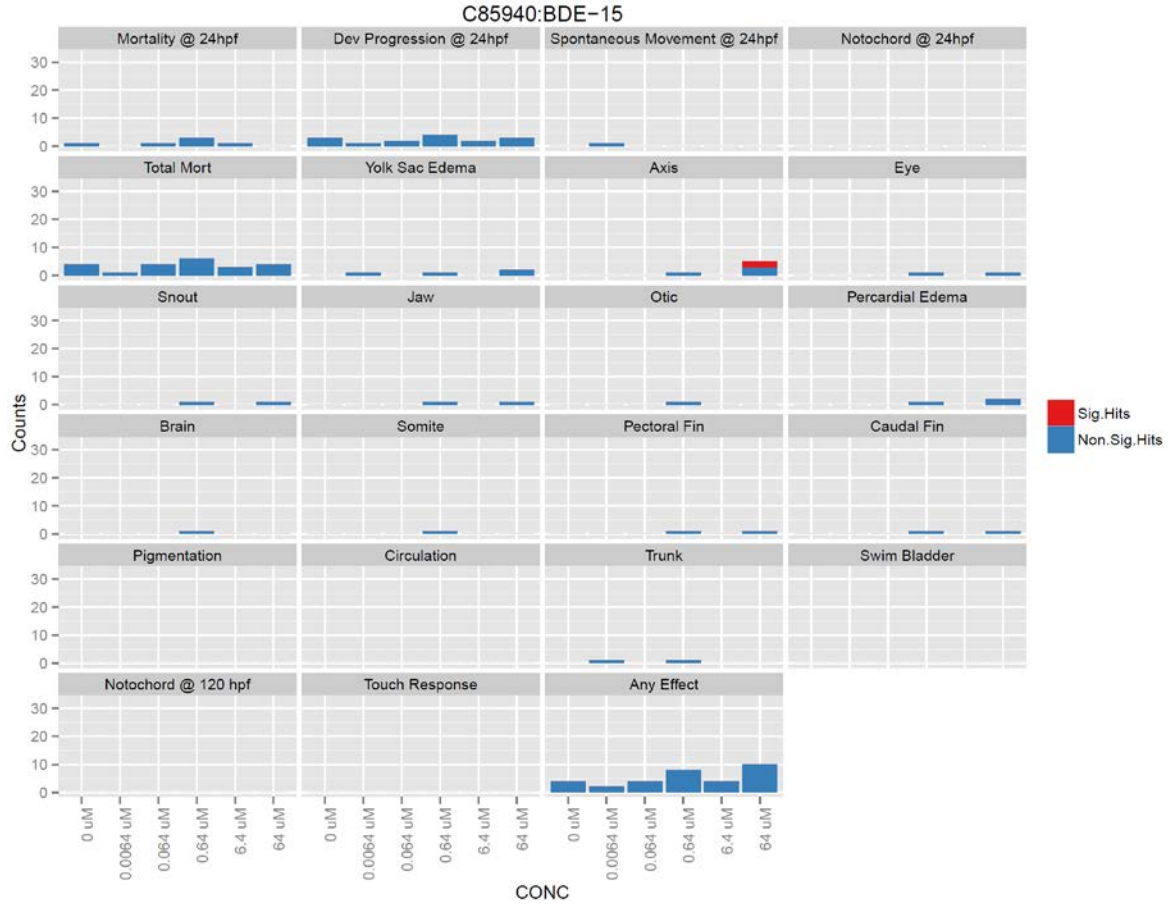

***BDE-15: Zebrafish embryo PRAT results at 24 hpf***

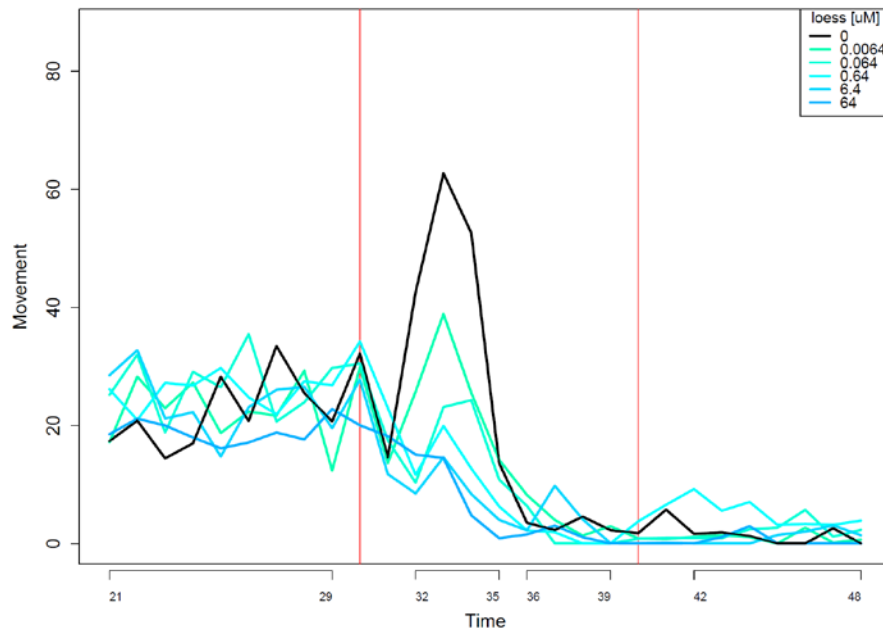

**BDE-15: Zebrafish larvae PMR assay results at 120 hpf**

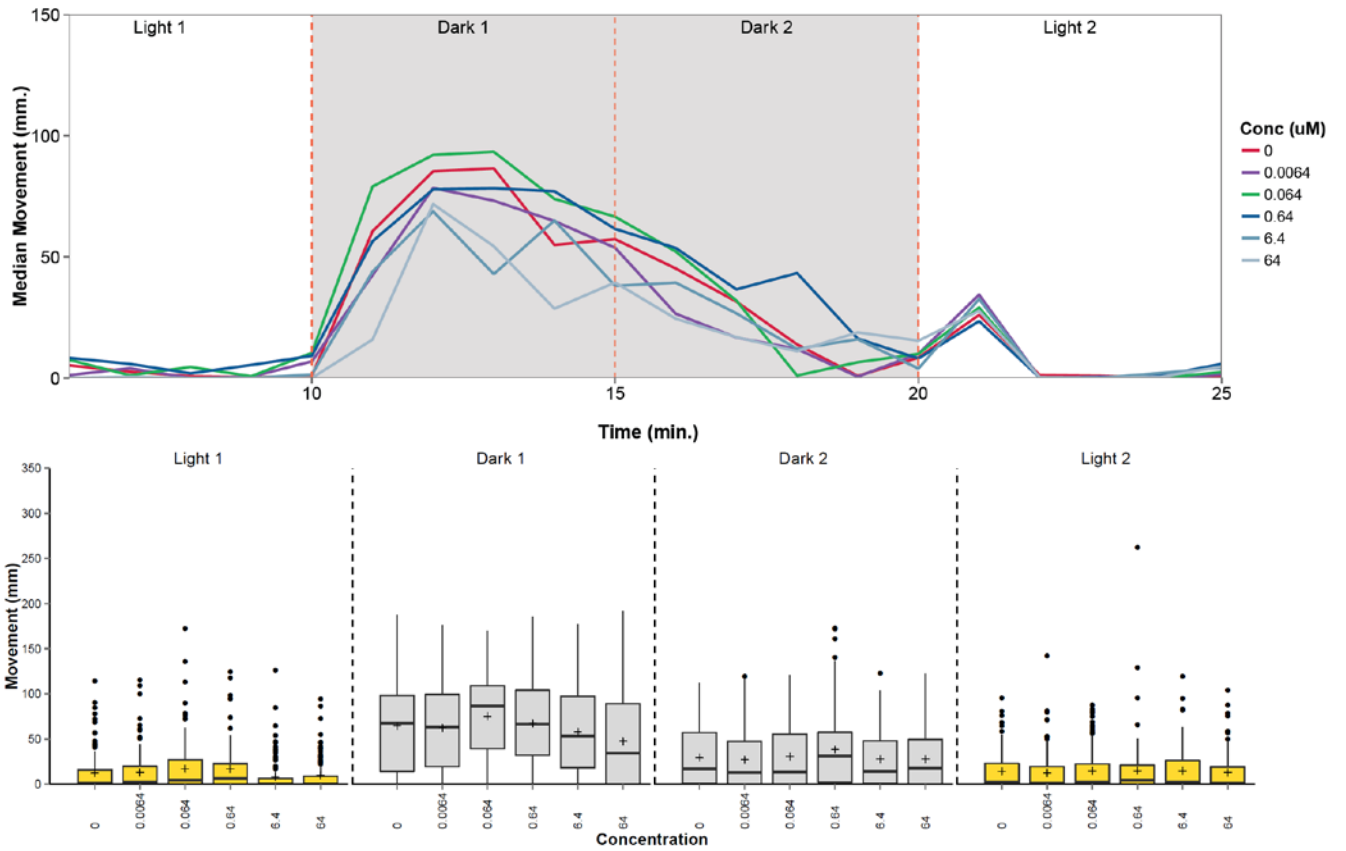

**2,2',4,4'-Tetrabromodiphenyl ether (BDE-47)**

***BDE-47: Zebrafish Mortality and Malformations at 24 and 120 hpf***

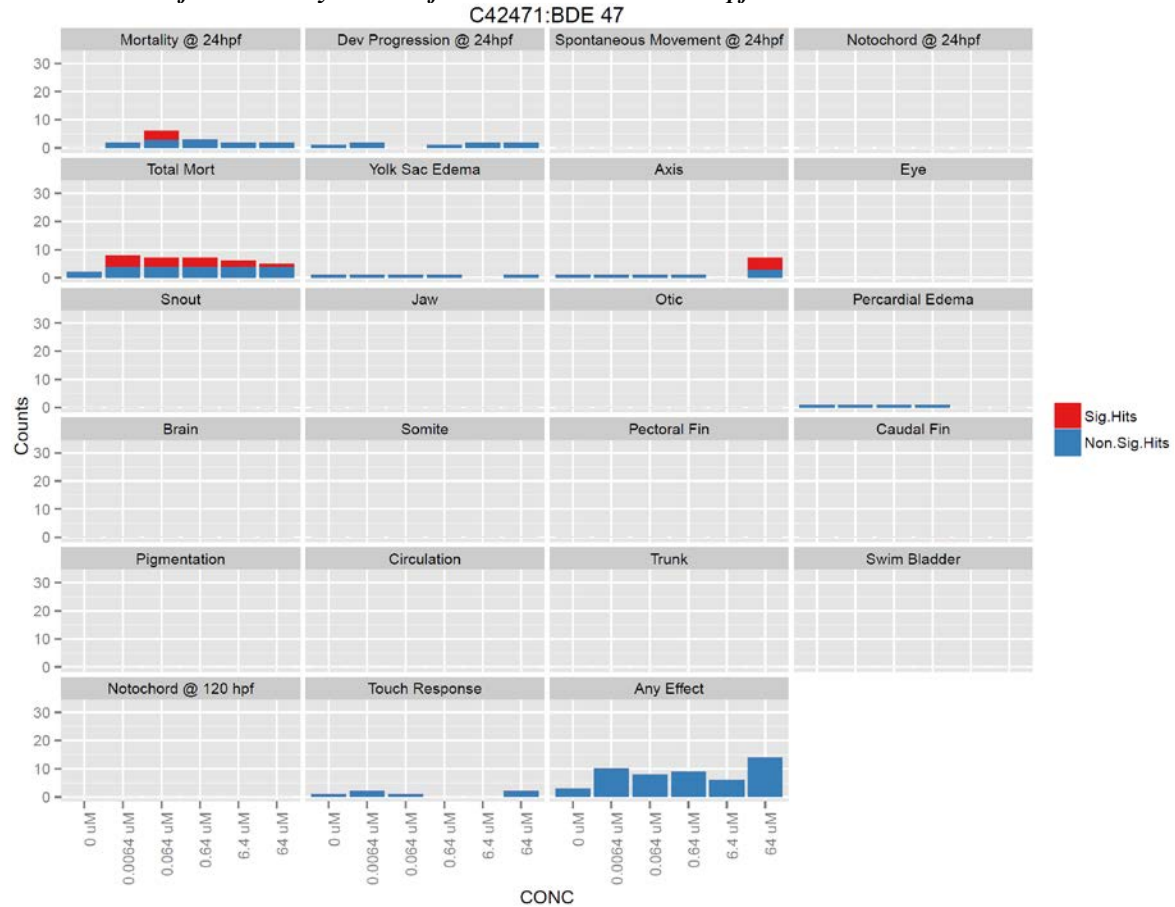

***BDE-47: Zebrafish embryo PRAT results at 24 hpf***

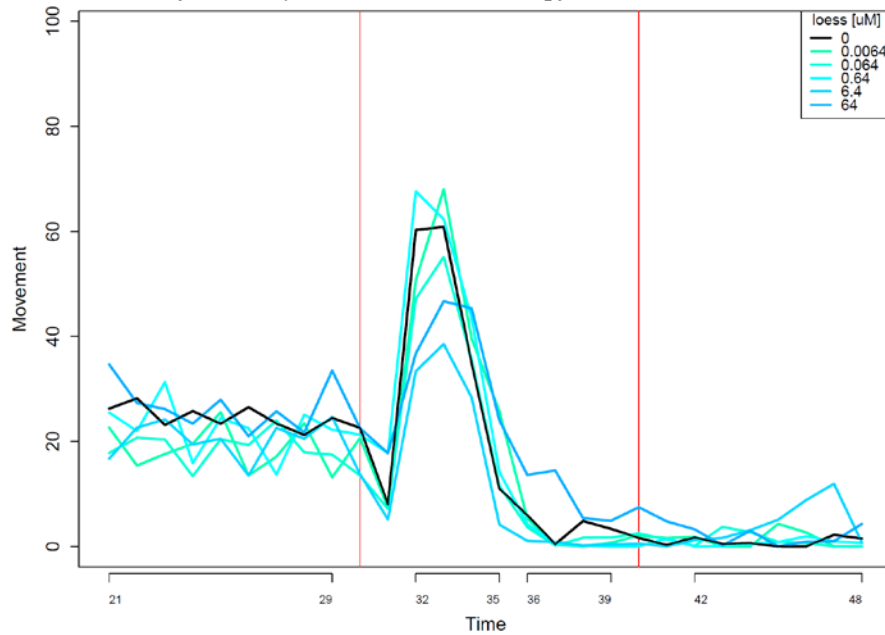

**BDE-47: Zebrafish larvae PMR assay results at 120 hpf**

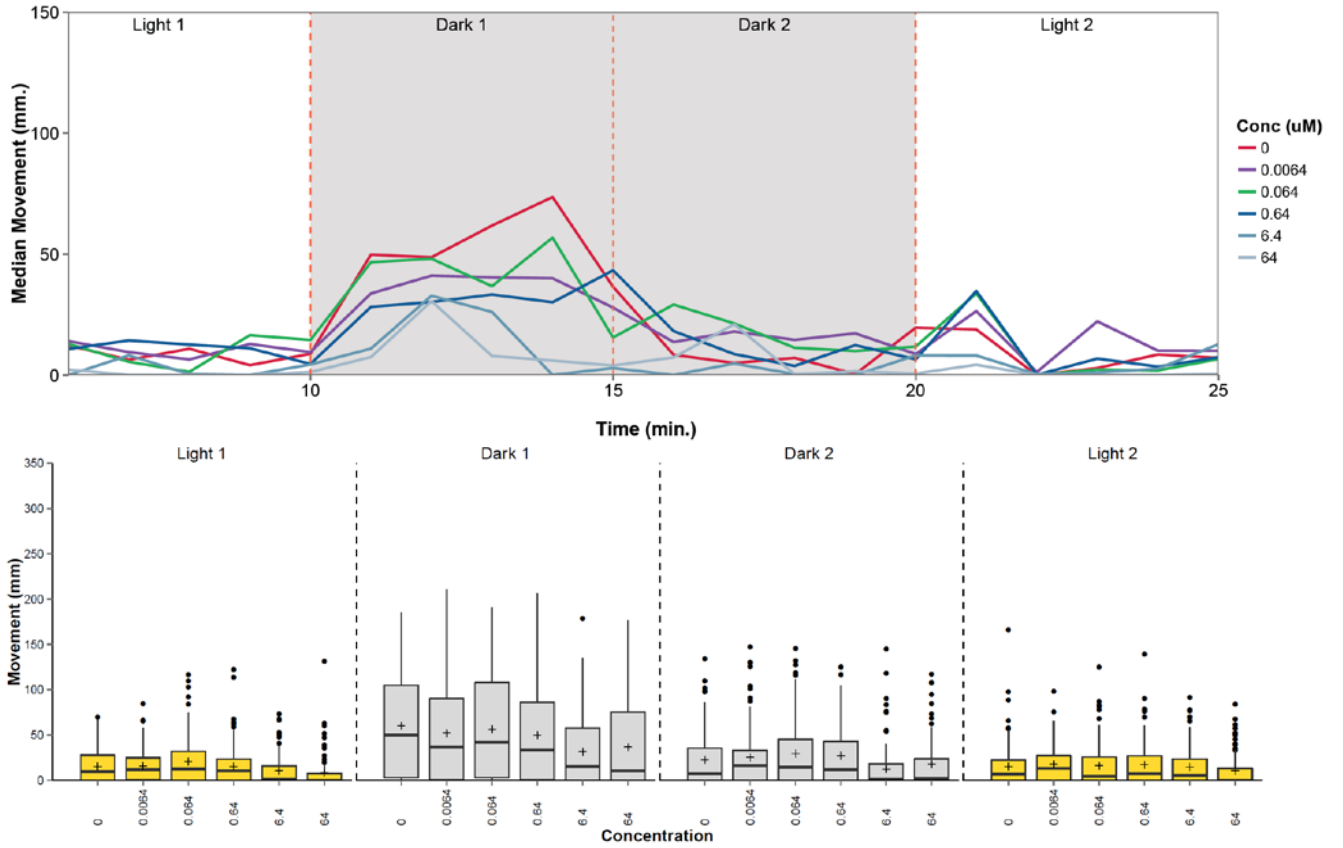



**2,2',4,4',5-Pentabromodiphenyl ether (BDE-99)**

**BDE-99: Zebrafish Mortality and Malformations at 24 and 120 hpf**

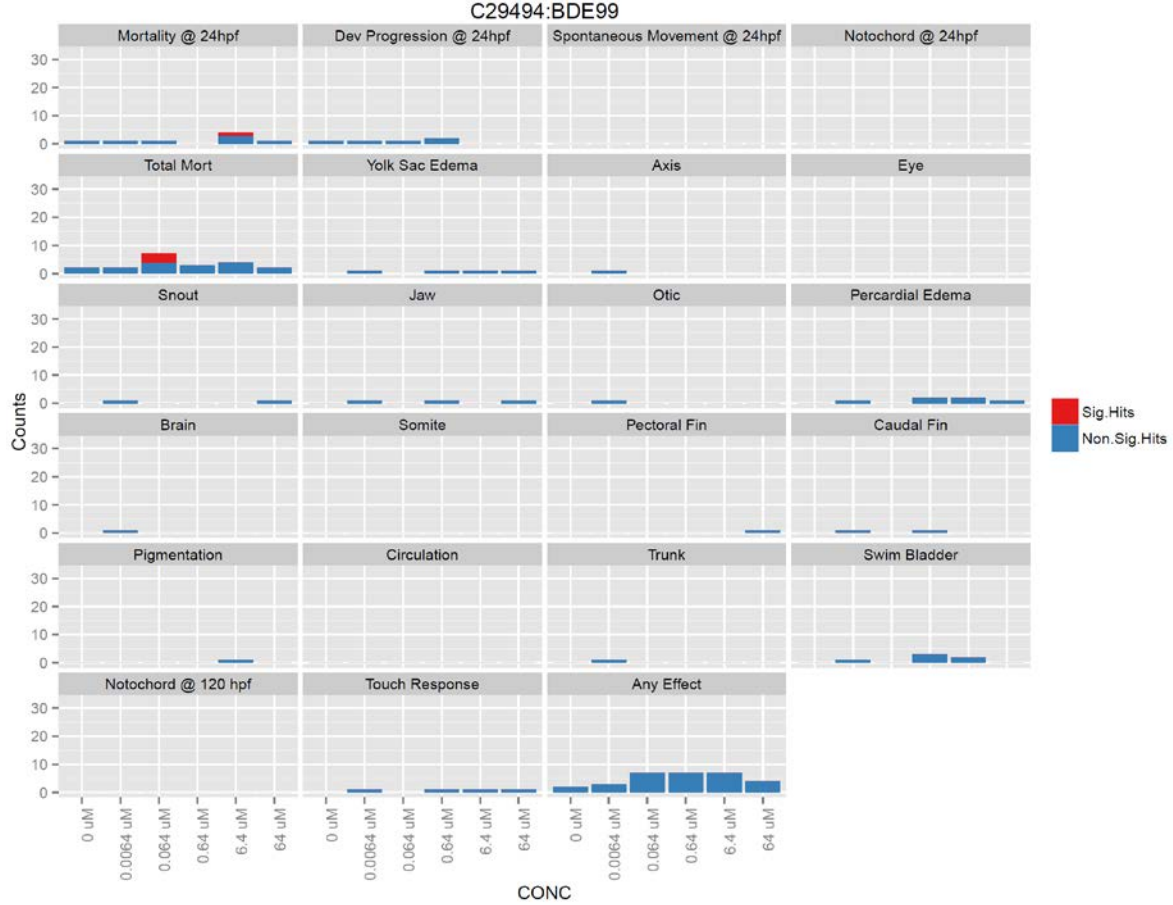

**BDE-99: Zebrafish embryo PRAT results at 24 hpf**

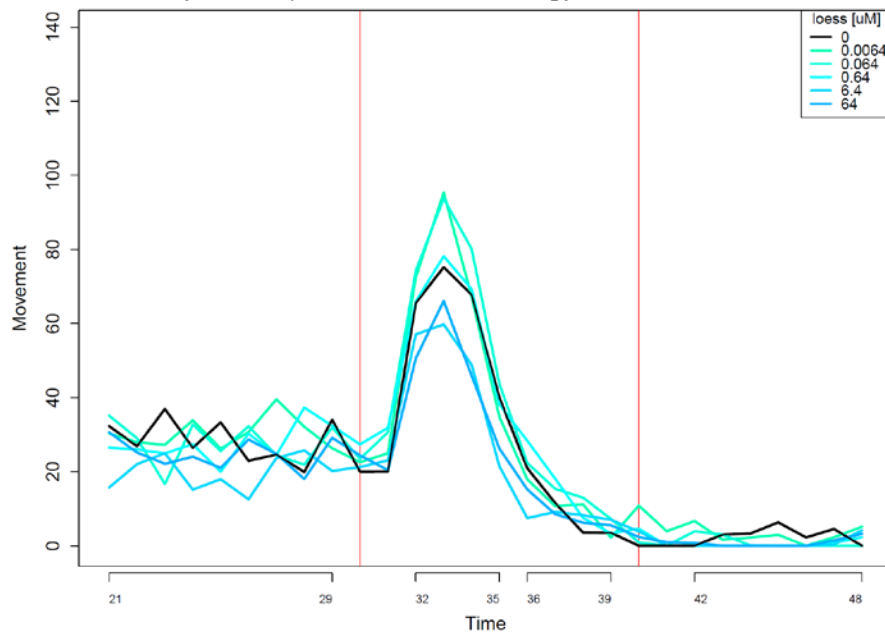

**BDE-99: Zebrafish larvae PMR assay results at 120 hpf**

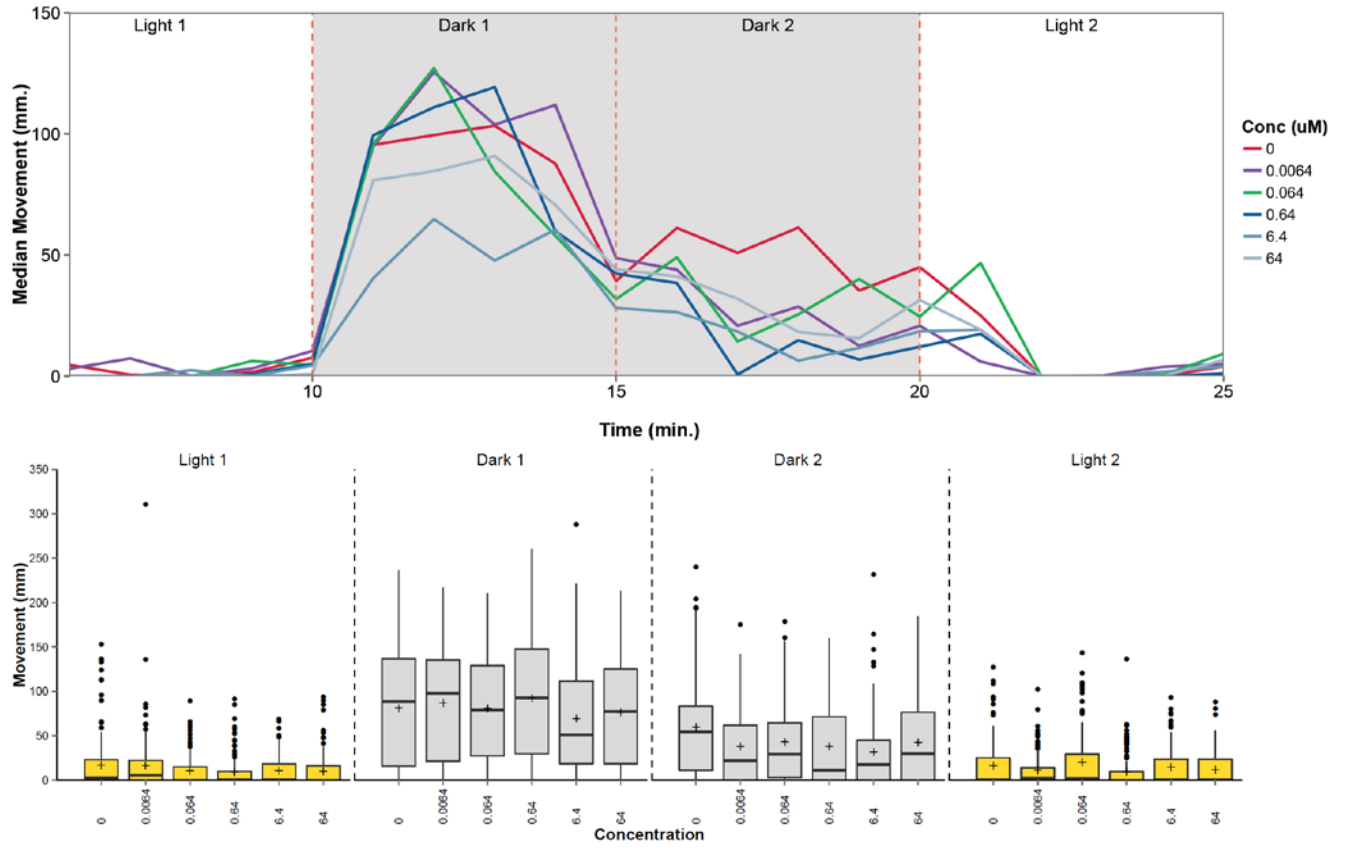

**2,2',4,4',6-Pentabromodiphenyl ether (BDE-100)**

***BDE-100: Zebrafish Mortality and Malformations at 24 and 120 hpf***

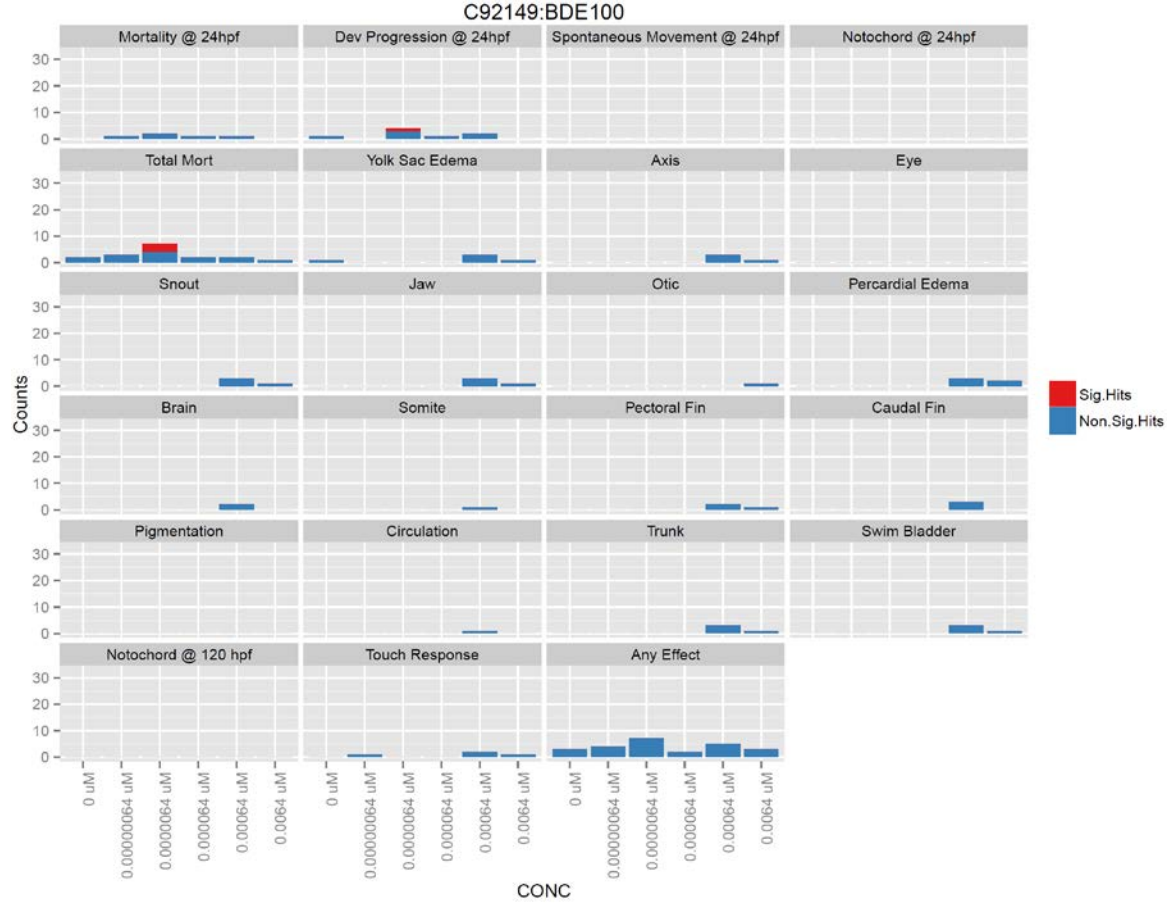

***BDE-100: Zebrafish embryo PRAT results at 24 hpf***

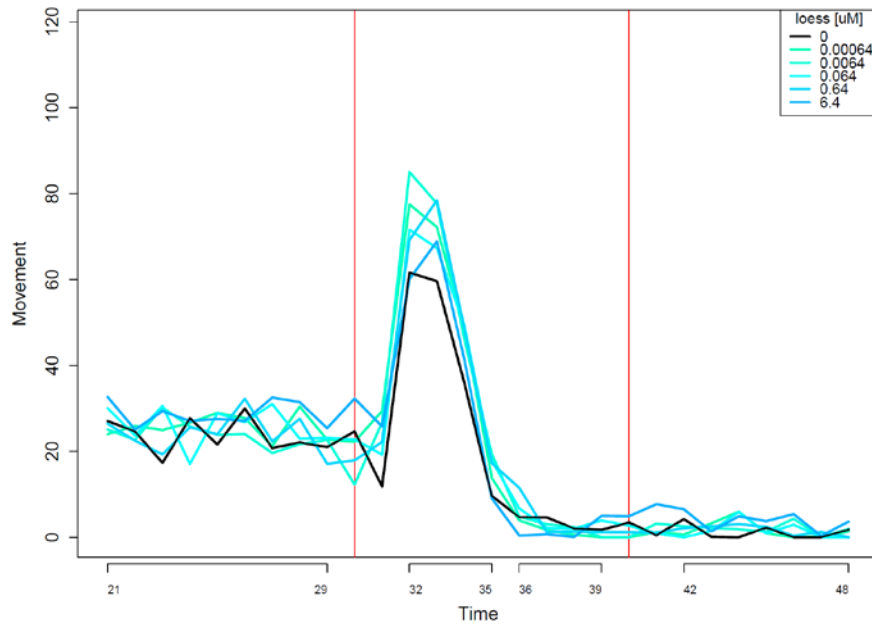

**BDE-100: Zebrafish larvae PMR assay results at 120 hpf**

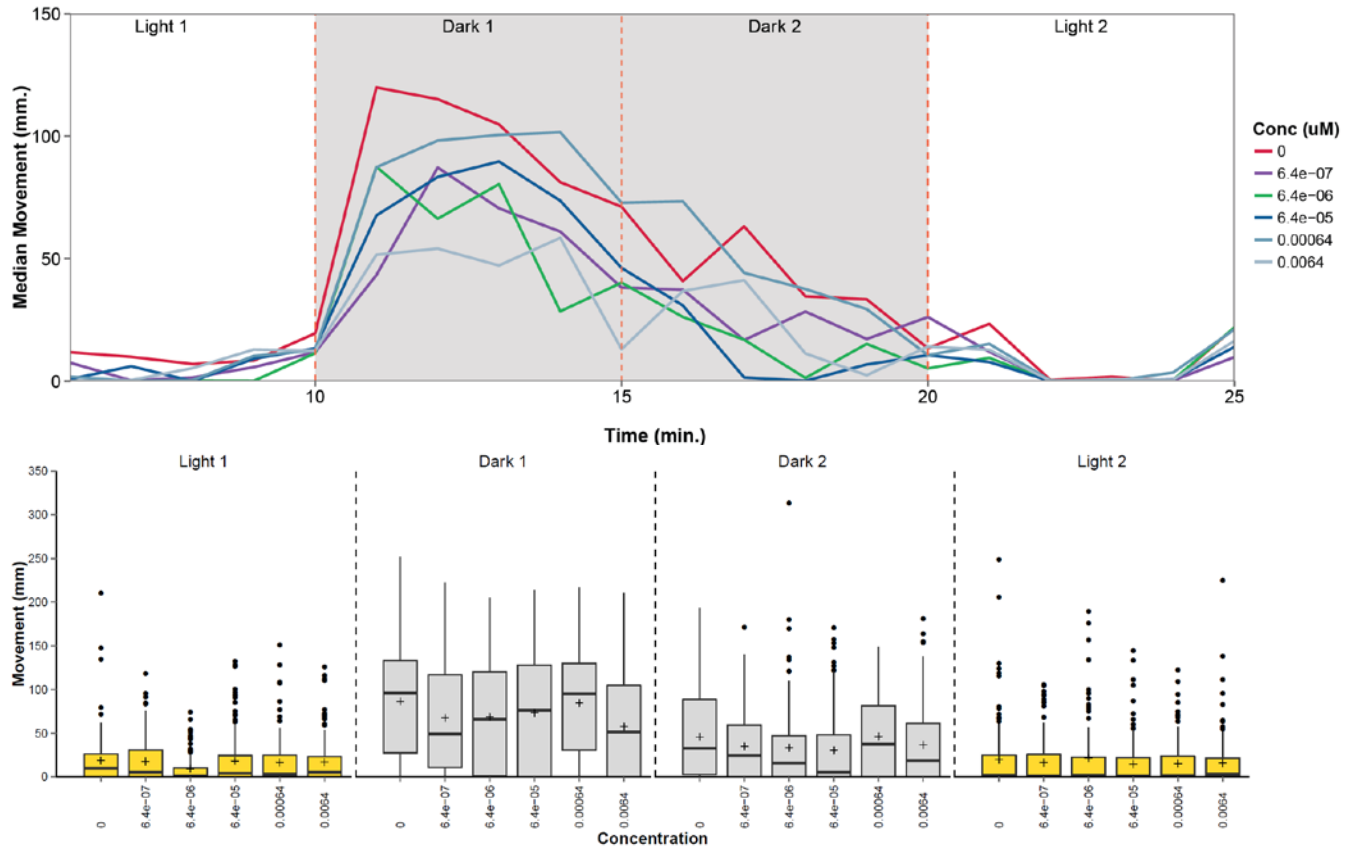

**2,2',4,4',5,5'-Hexabromodiphenyl ether (BDE-153)**

**BDE-153: Zebrafish Mortality and Malformations at 24 and 120 hpf**

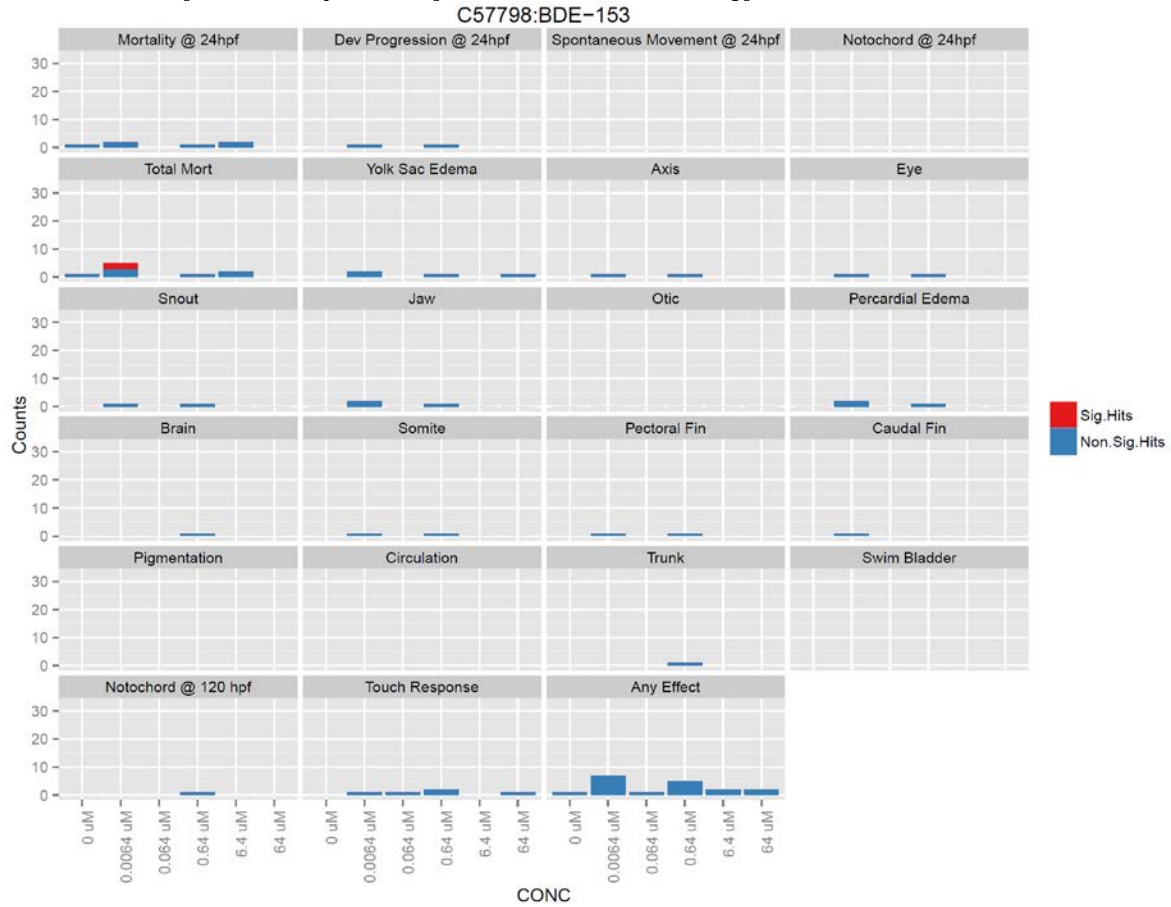

**BDE-153: Zebrafish embryo PRAT results at 24 hpf**

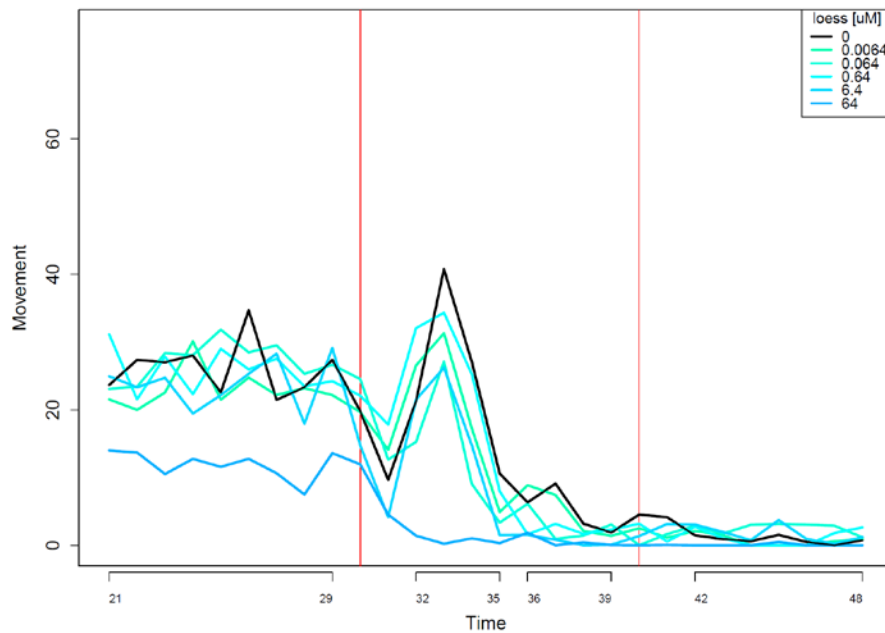

**BDE-153: Zebrafish larvae PMR assay results at 120 hpf**

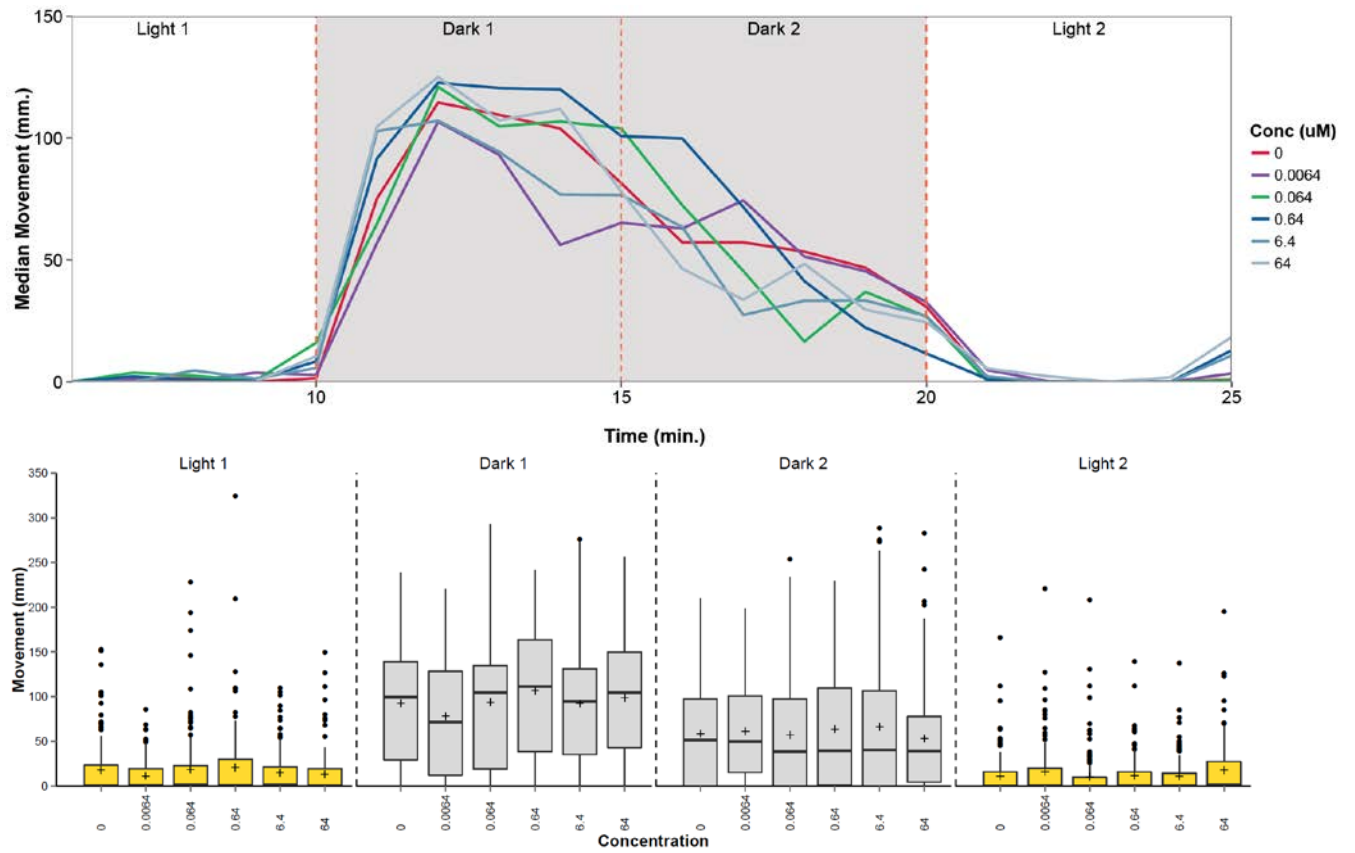

**2,2',4,4',5,6'-Hexabromodiphenyl ether (BDE-154)**

**BDE-154: Zebrafish Mortality and Malformations at 24 and 120 hpf**

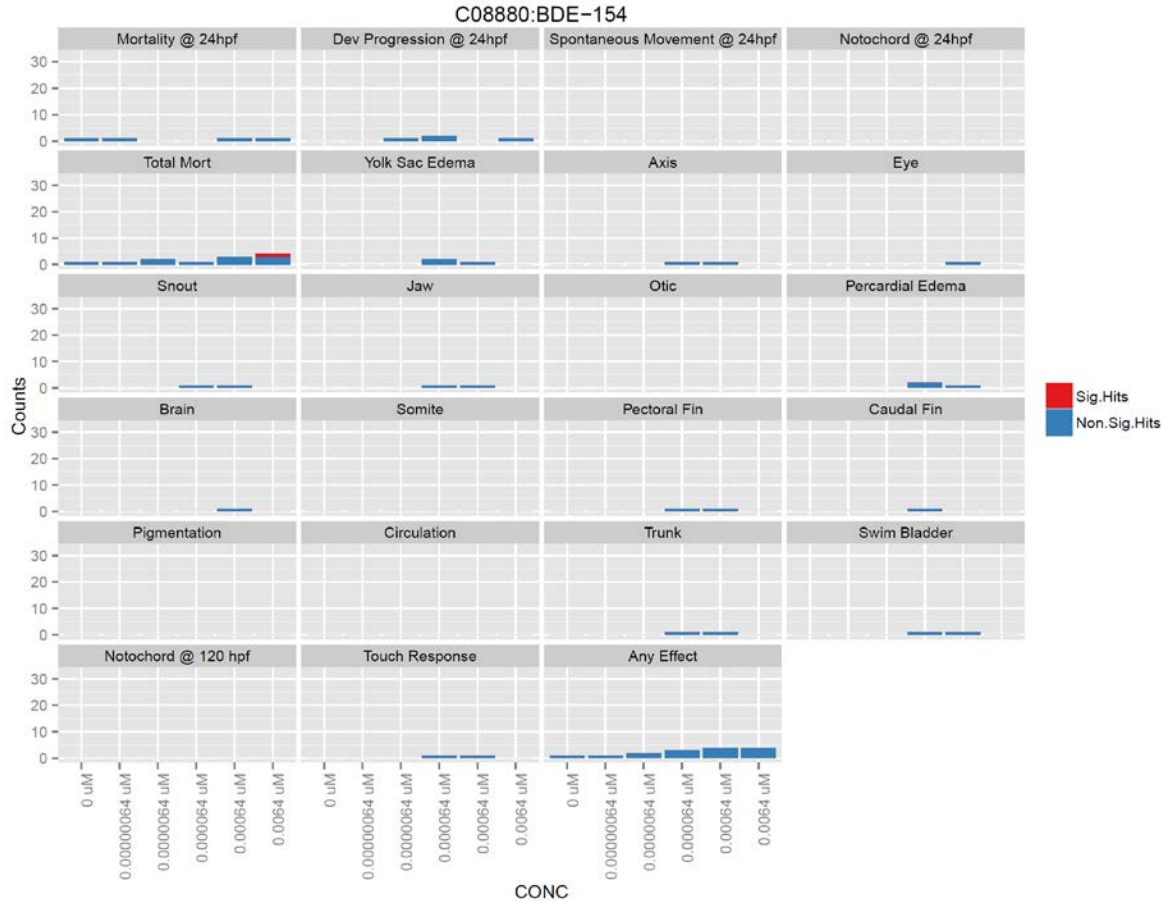

**BDE-154: Zebrafish embryo PRAT results at 24 hpf**

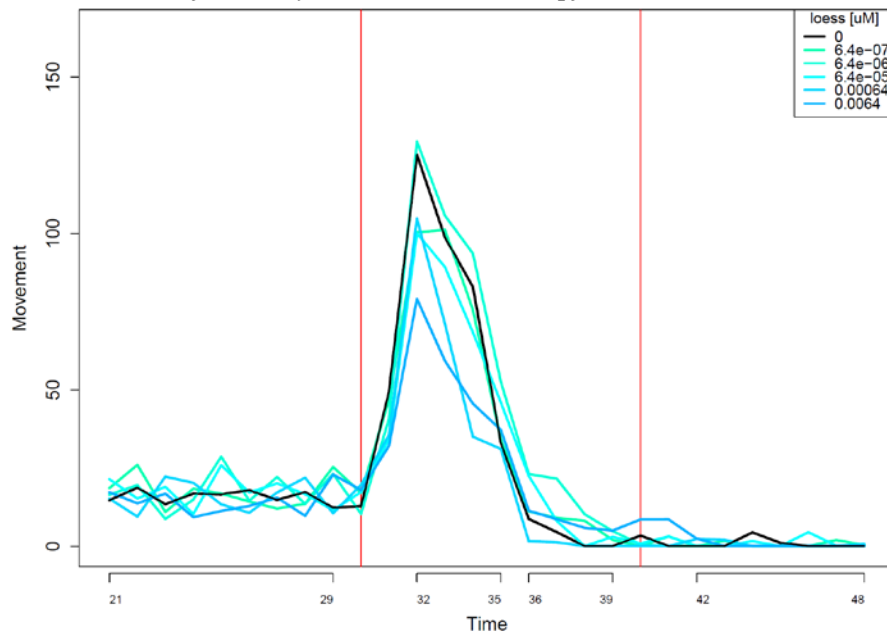

**BDE-154: Zebrafish larvae PMR assay results at 120 hpf**

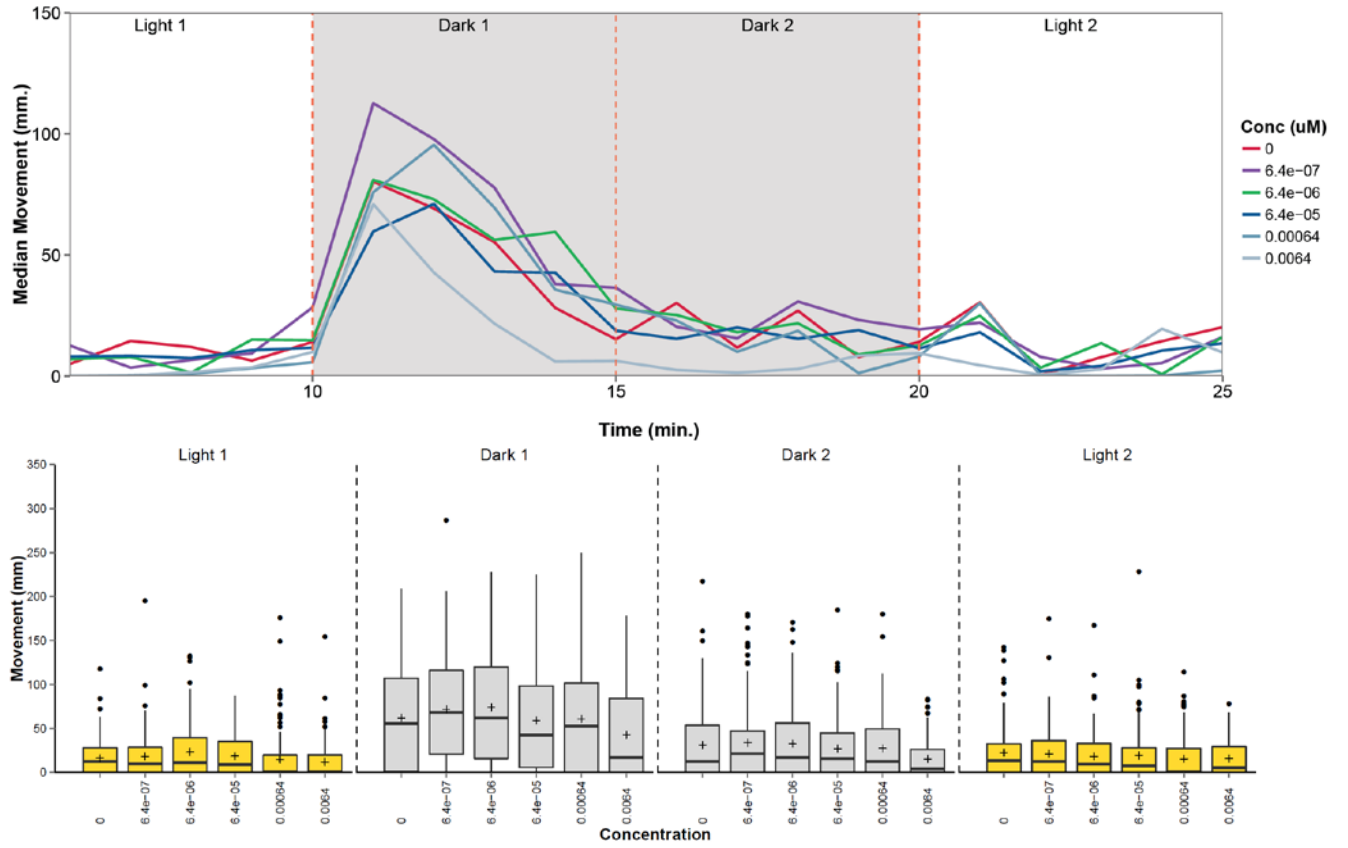



**2,2',3,4,4',5',6-Heptabromodiphenyl ether (BDE-183)**

***BDE-183: Zebrafish Mortality and Malformations at 24 and 120 hpf***

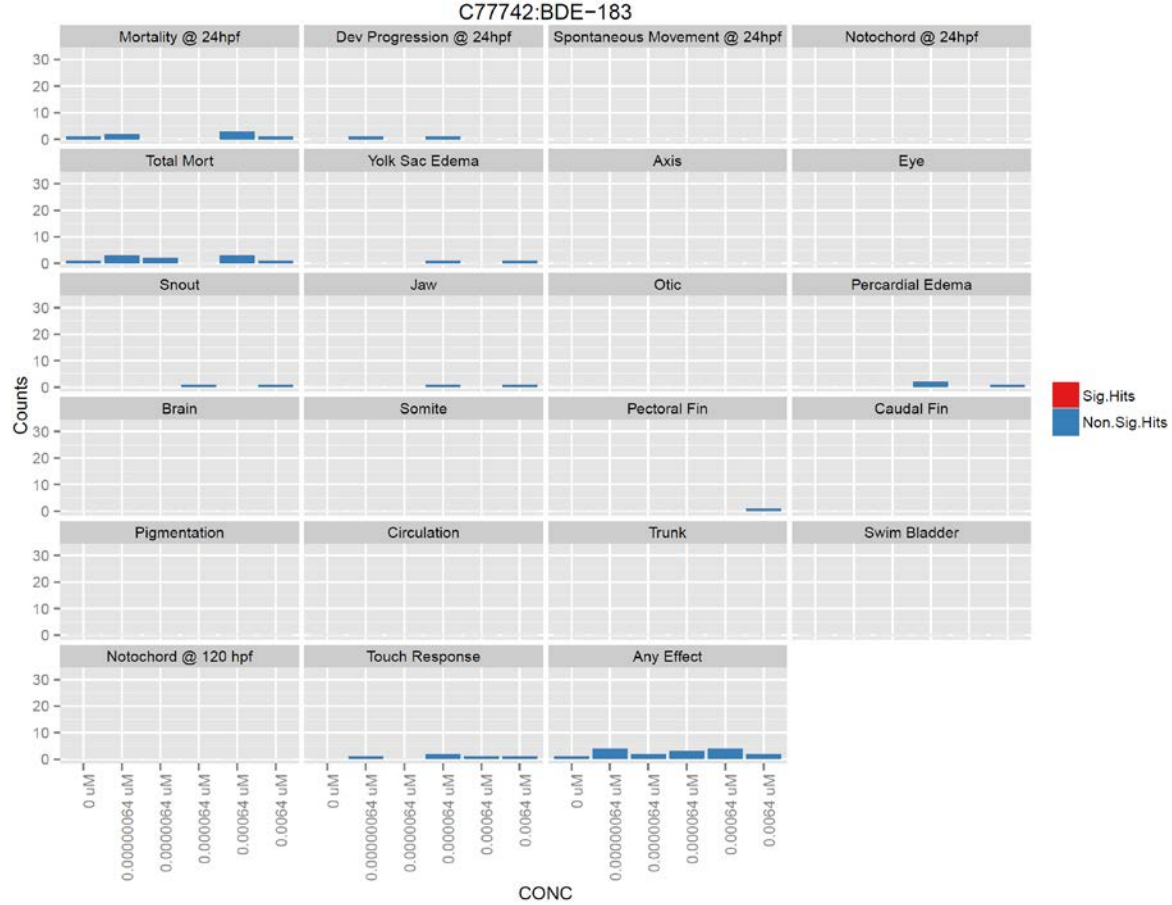

***BDE-183: Zebrafish embryo PRAT results at 24 hpf***

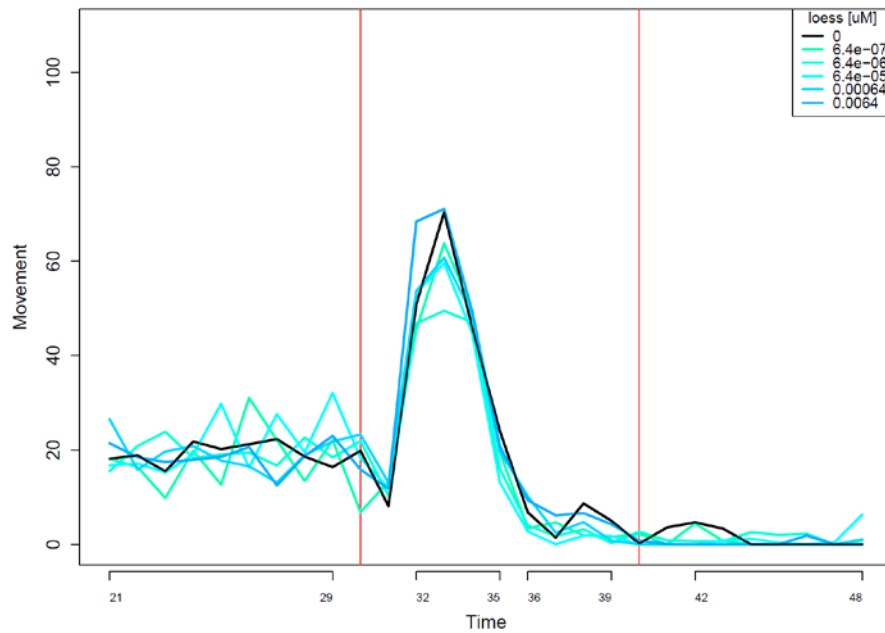

**BDE-183: Zebrafish larvae PMR assay results at 120 hpf**

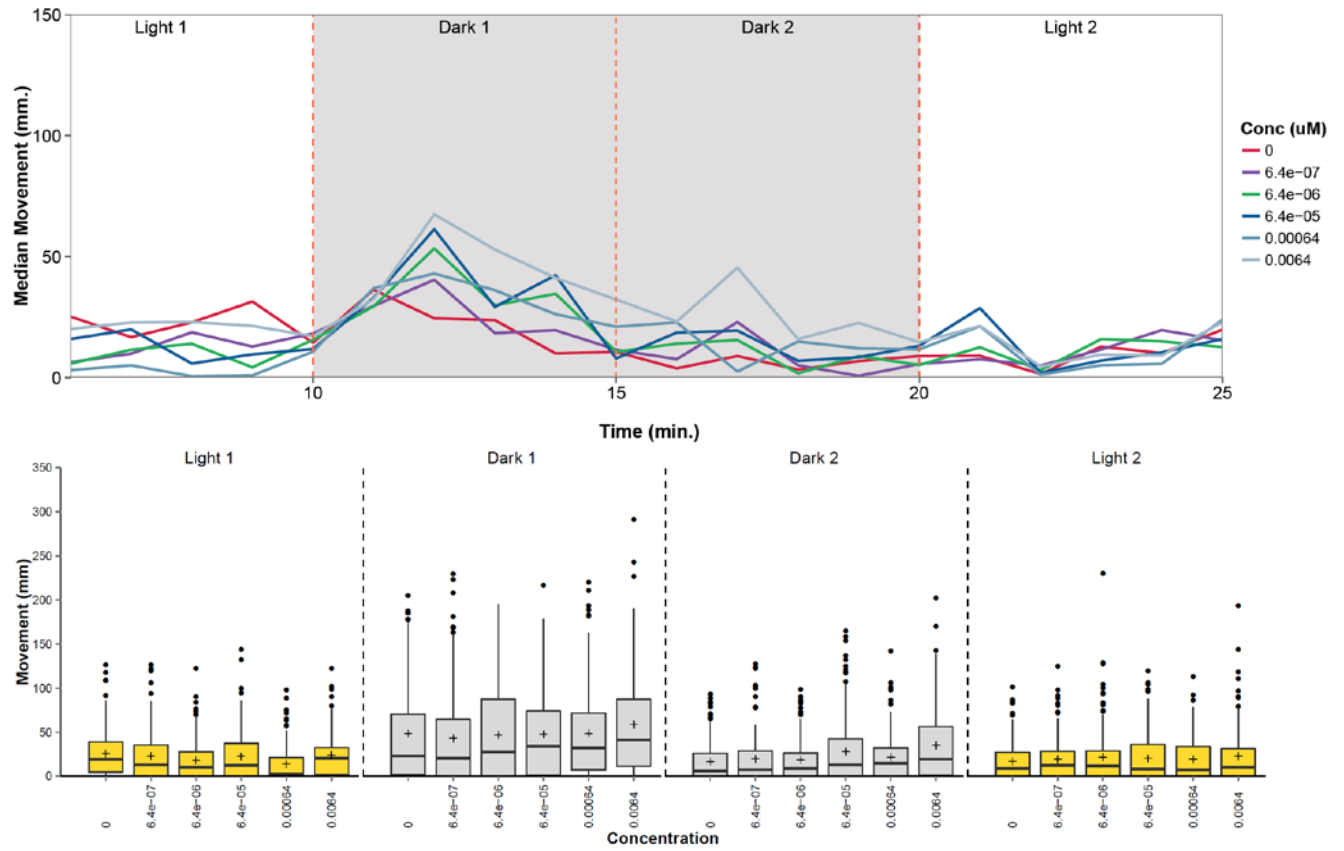

**Decabromodiphenyl ether (BDE-209)**

***BDE-209: Zebrafish Mortality and Malformations at 24 and 120 hpf***

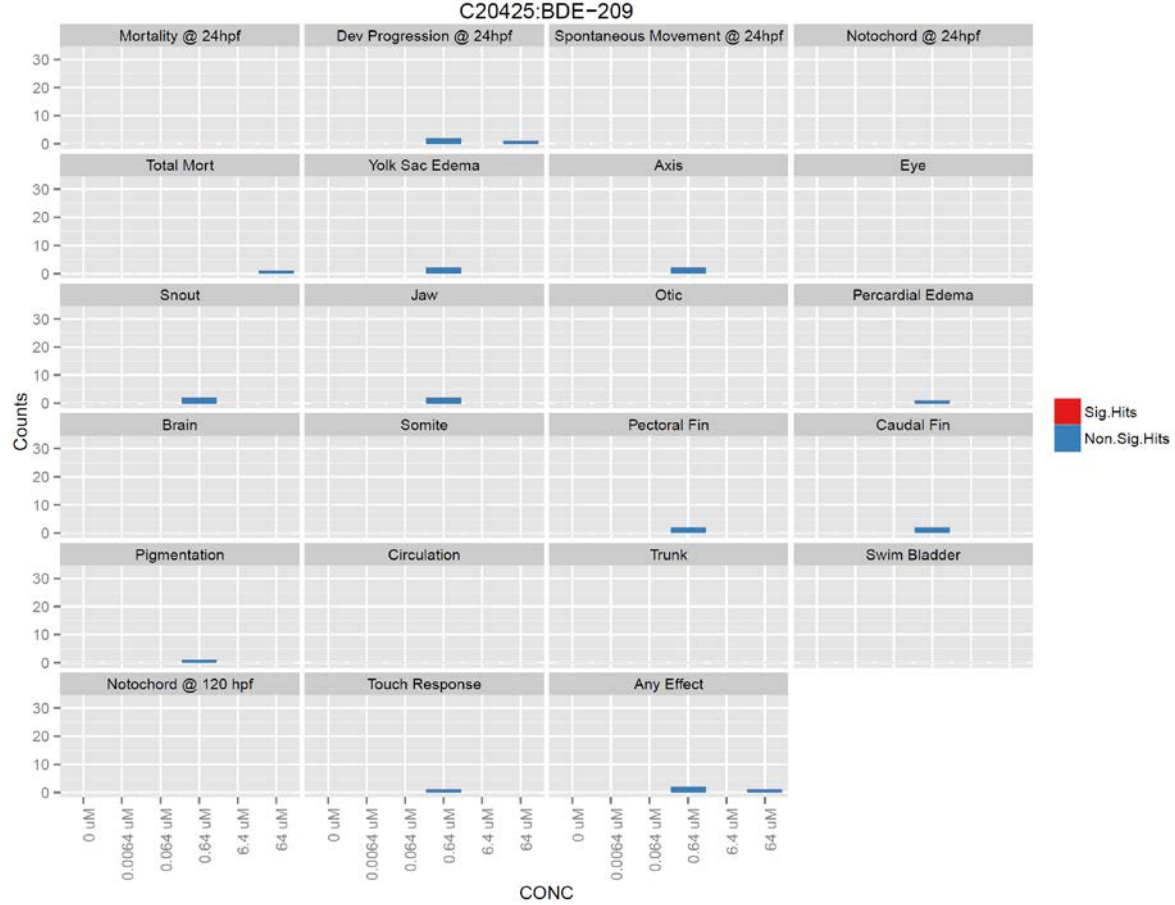

***BDE-209: Zebrafish embryo PRAT results at 24 hpf***

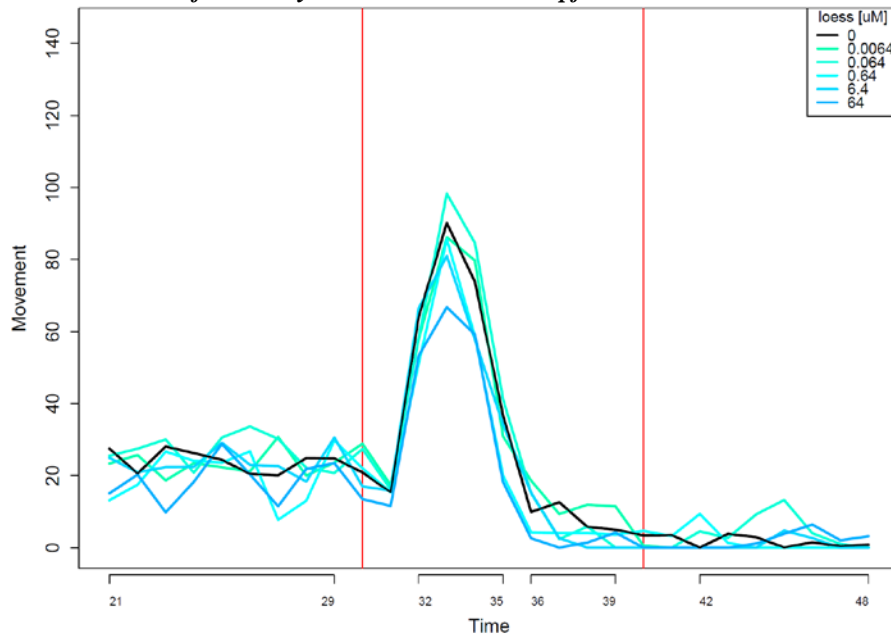

**BDE-209: Zebrafish larvae PMR assay results at 120 hpf**

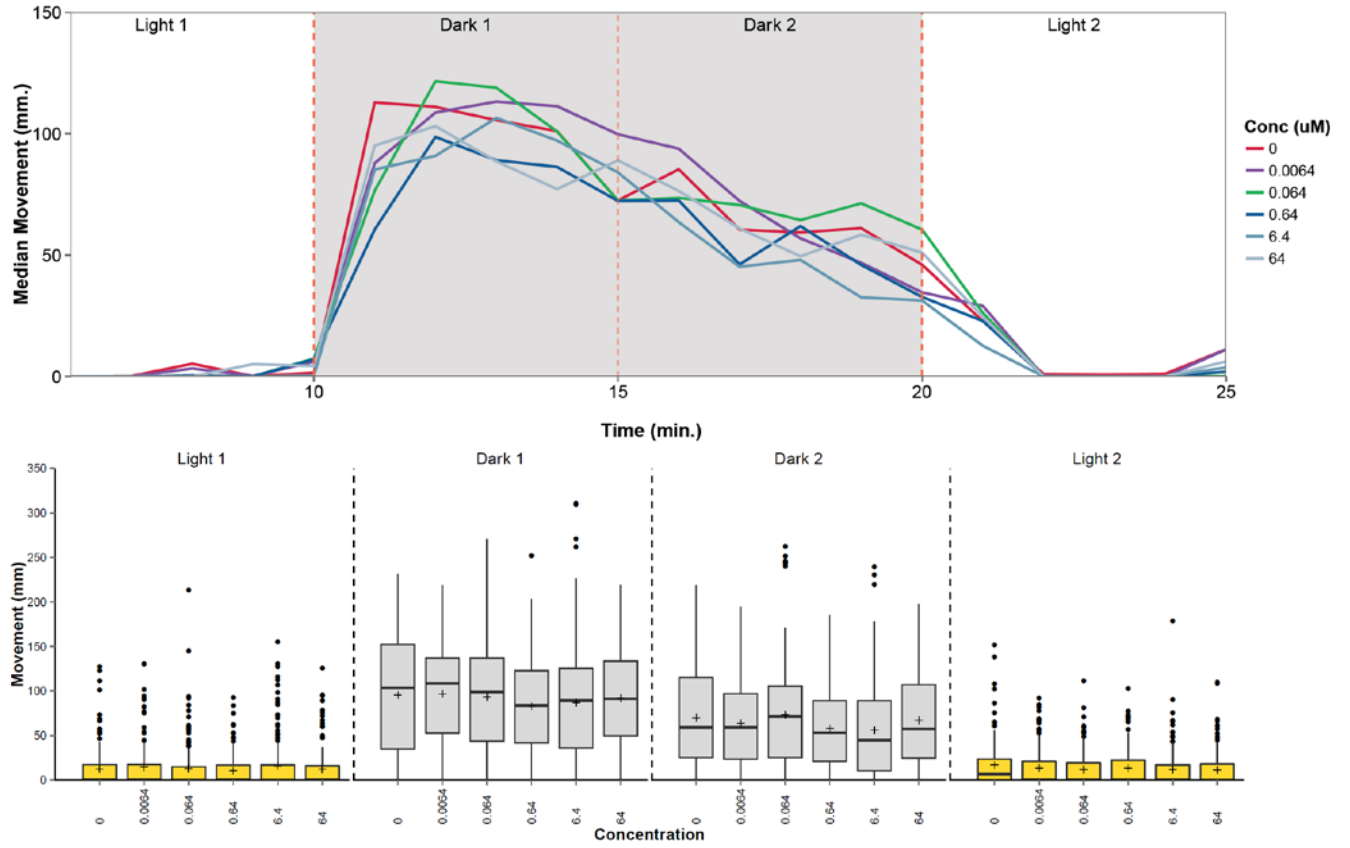

**PentaBDE commercial mixture (DE-71)**

**DE-71: Zebrafish Mortality and Malformations at 24 and 120 hpf**

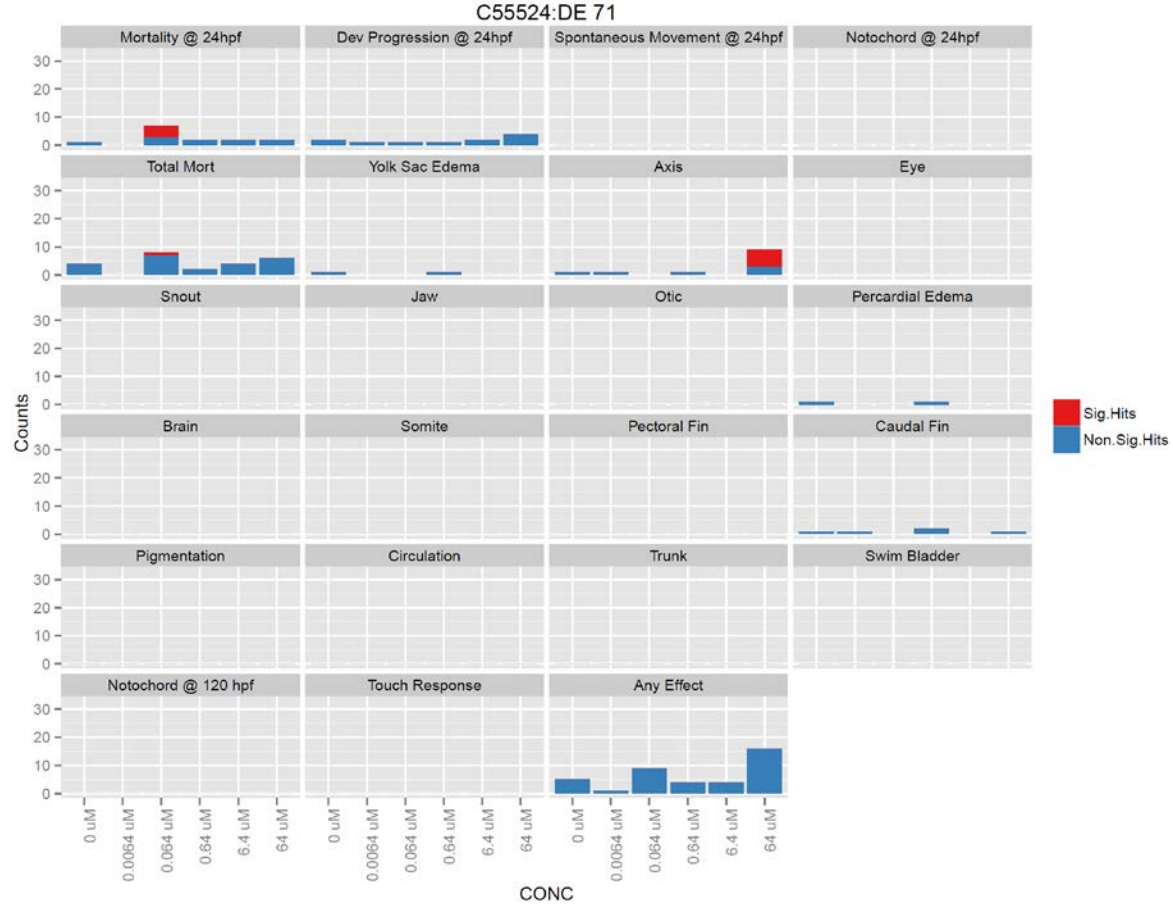

**DE-71: Zebrafish embryo PRAT results at 24 hpf**

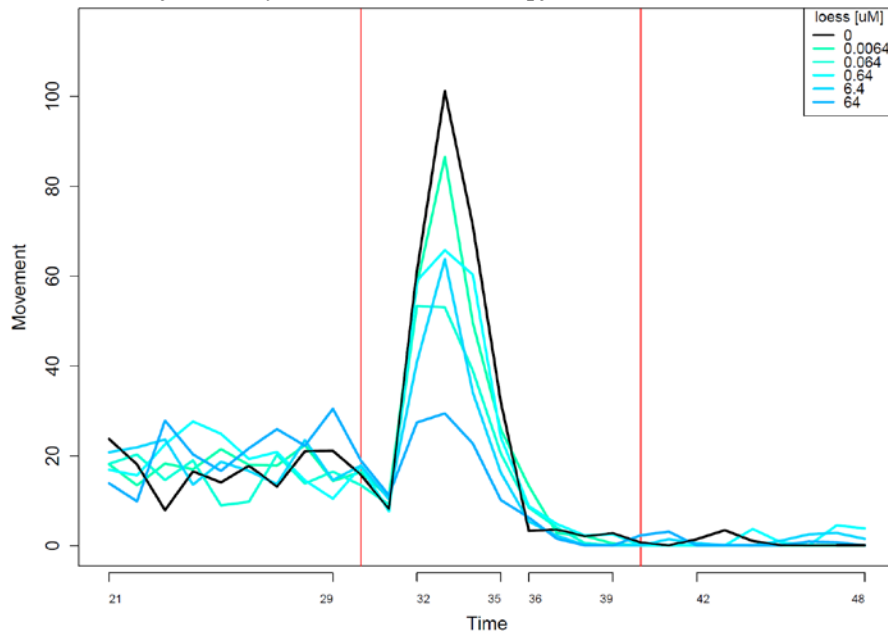

DE-71: Zebrafish larvae PMR assay results at 120 hpf

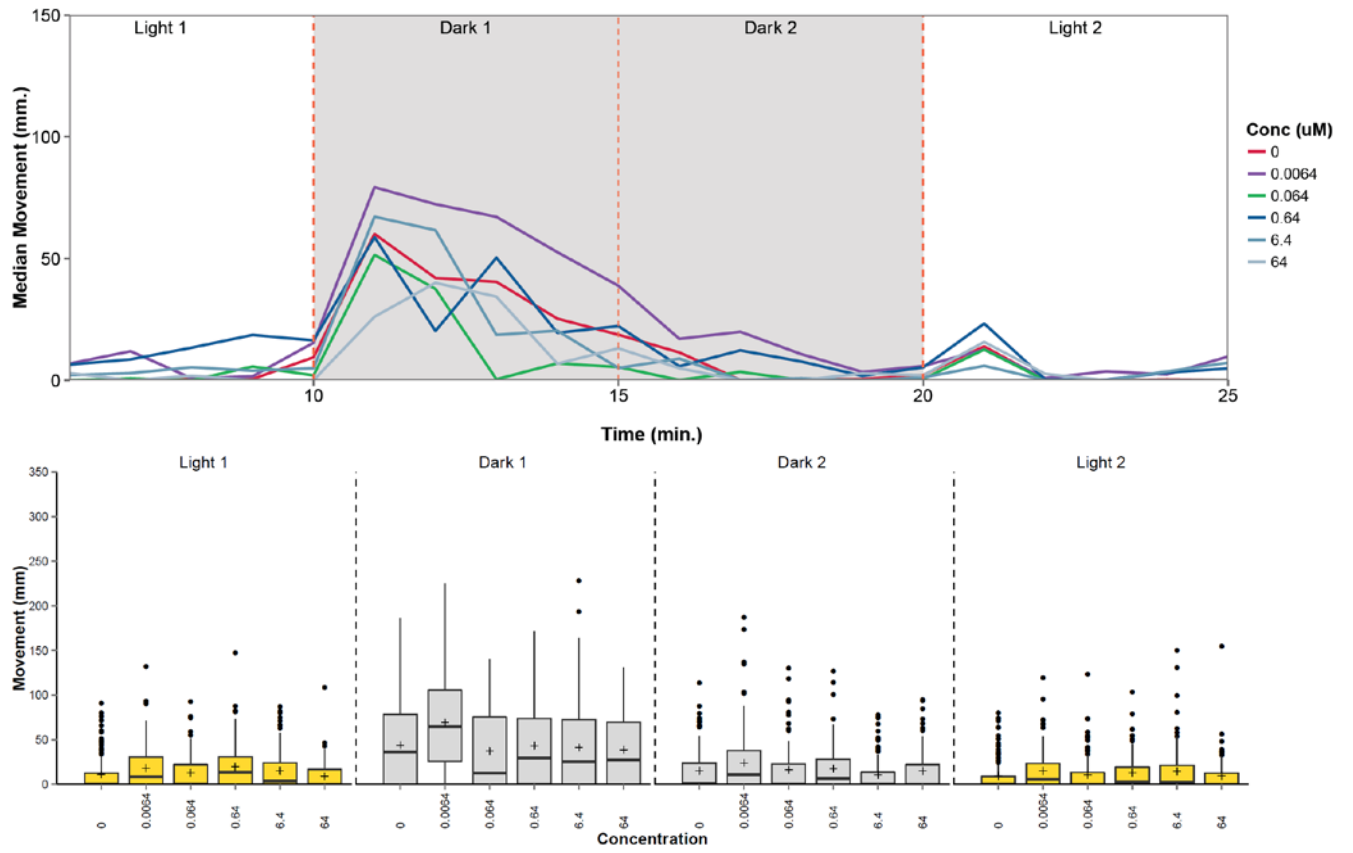

**OctaBDE commercial mixture (DE-79)**

**DE-79: Zebrafish Mortality and Malformations at 24 and 120 hpf**

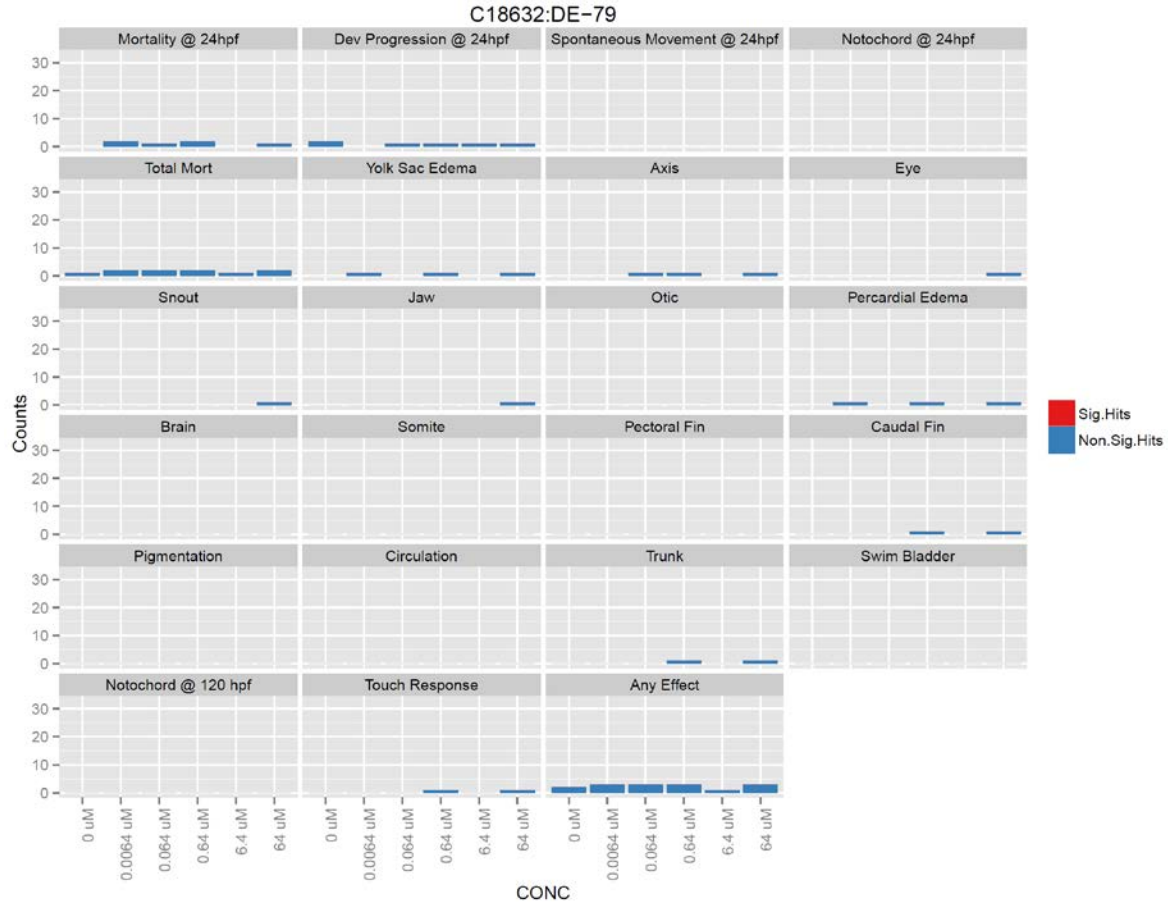

**DE-79: Zebrafish embryo PRAT results at 24 hpf**

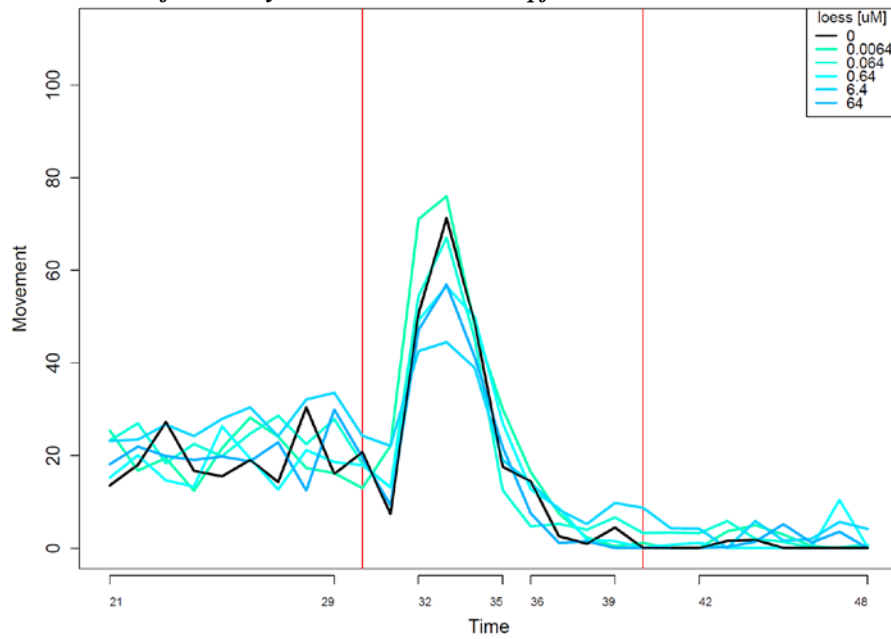

DE-79: Zebrafish larvae PMR assay results at 120 hpf

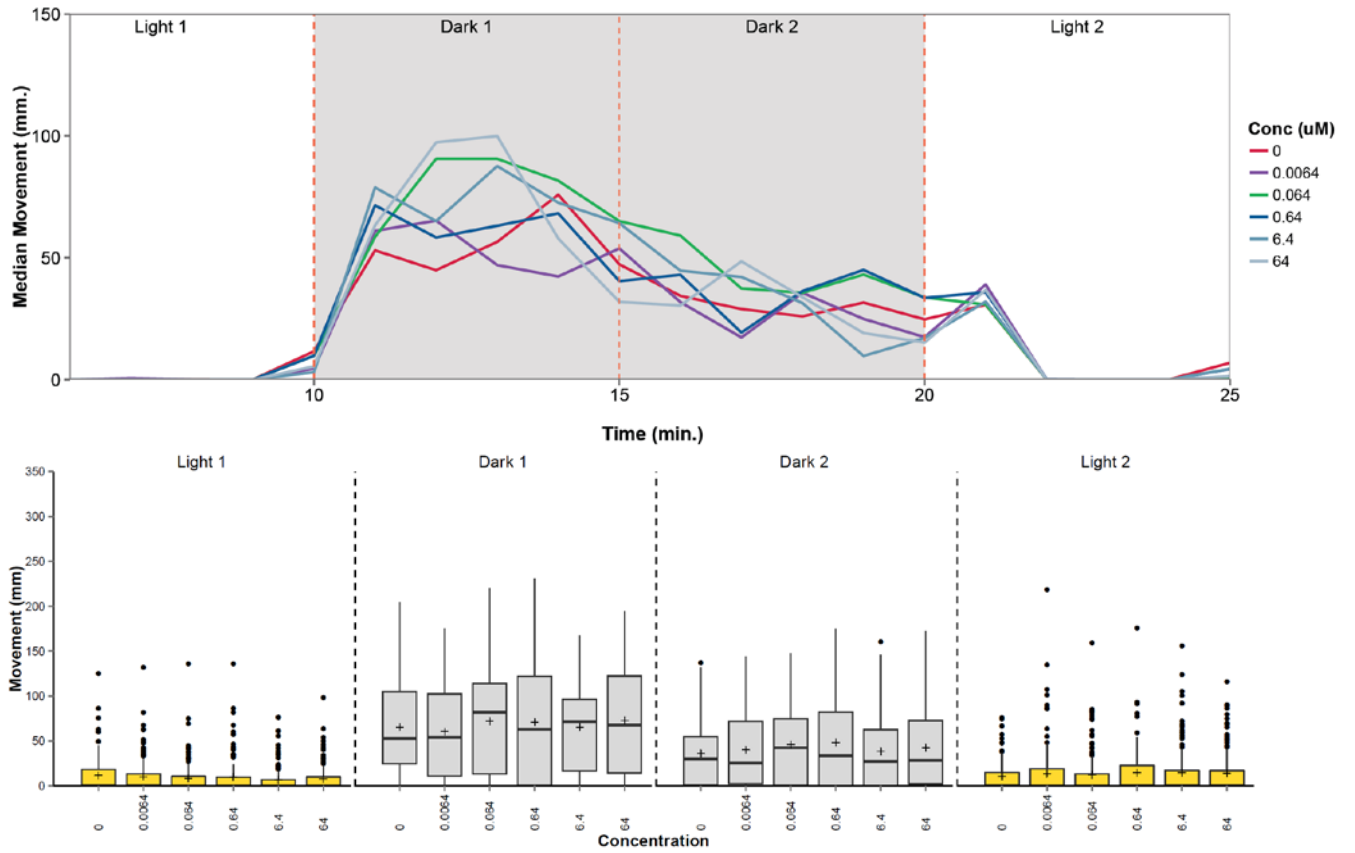





**HBCD: Zebrafish larvae PMR assay results at 120 hpf**

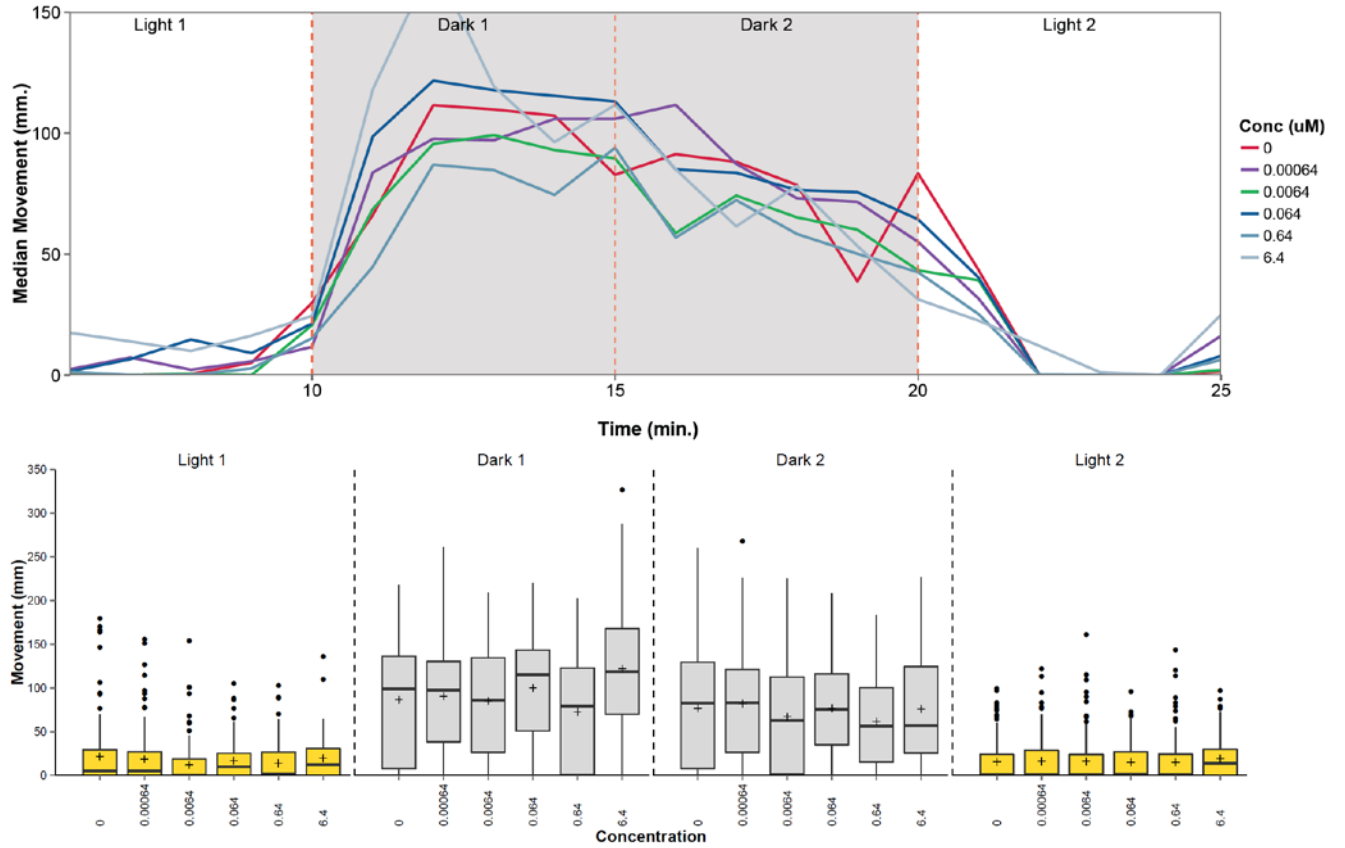

**2-ethylhexyl-tetrabromobenzoate (TBB)**

***TBB: Zebrafish Mortality and Malformations at 24 and 120 hpf***

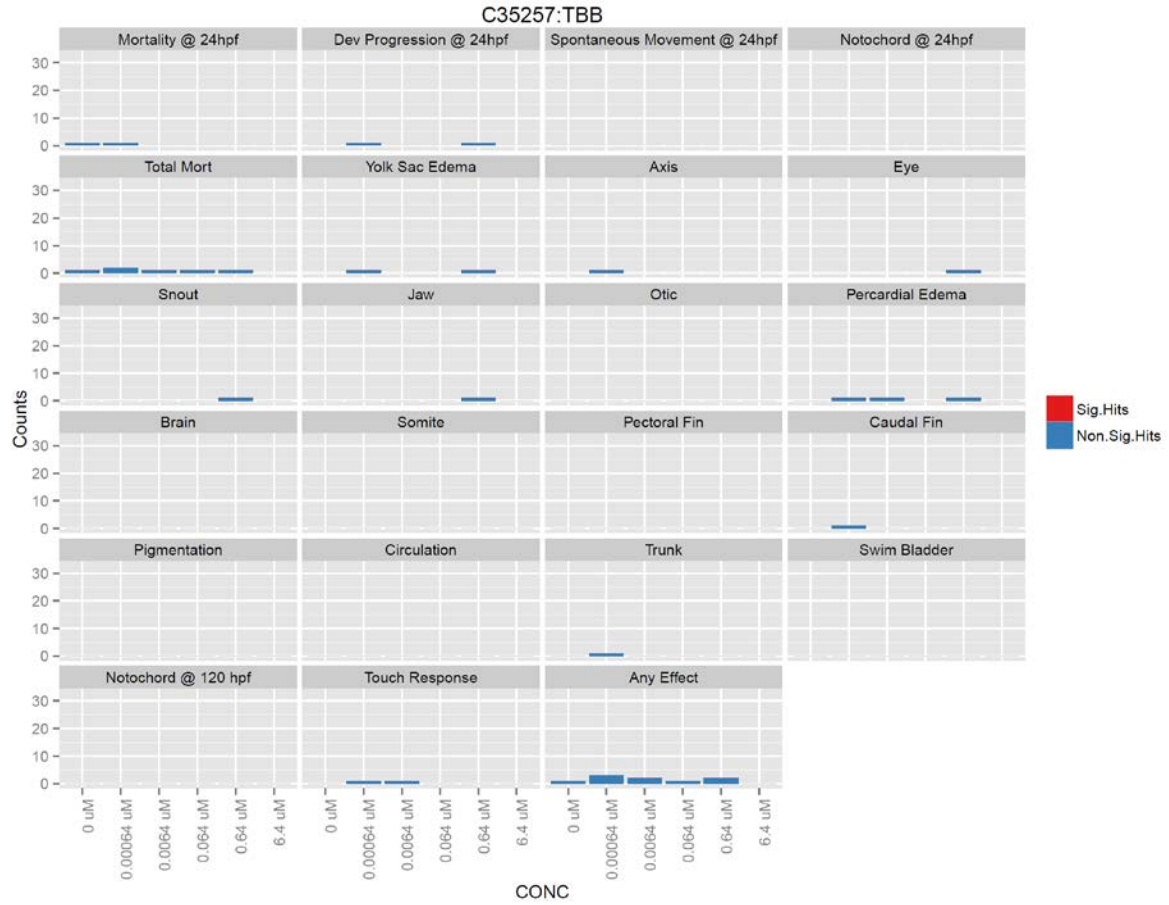

***TBB: Zebrafish embryo PRAT results at 24 hpf***

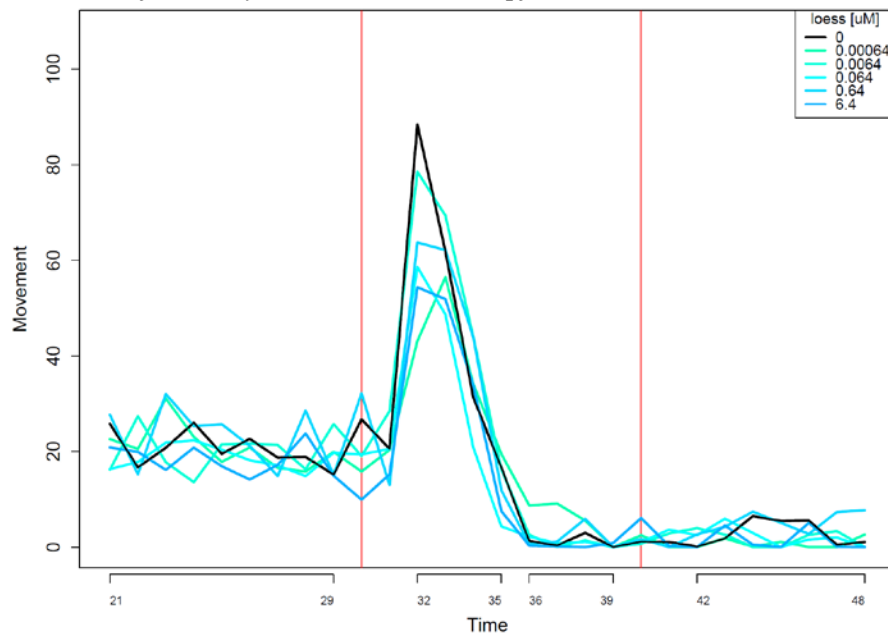

**TBB: Zebrafish larvae PMR assay results at 120 hpf**

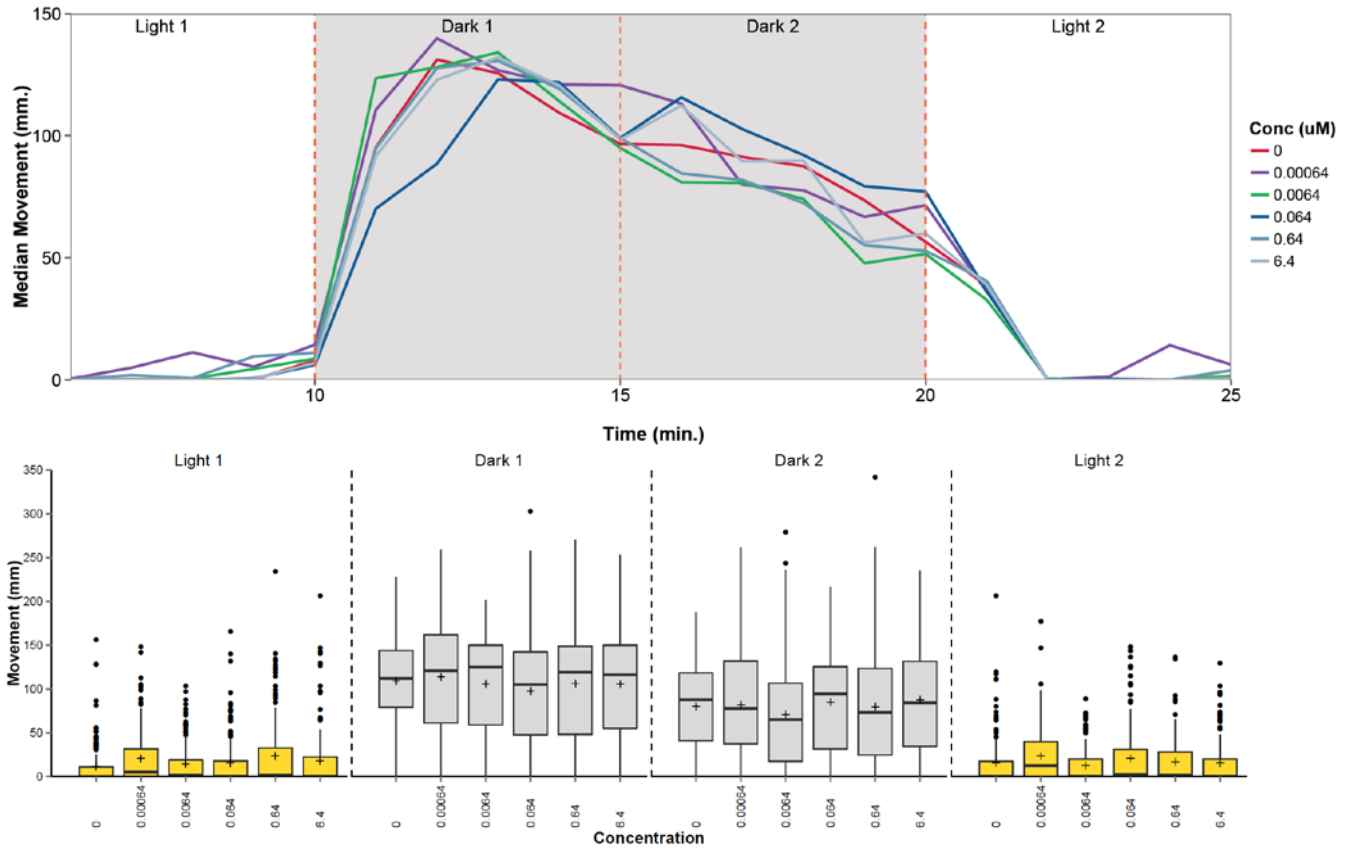

**3,3',5,5'-Tetrabromobisphenol A (TBBPA)**

**TBBPA: Zebrafish Mortality and Malformations at 24 and 120 hpf**

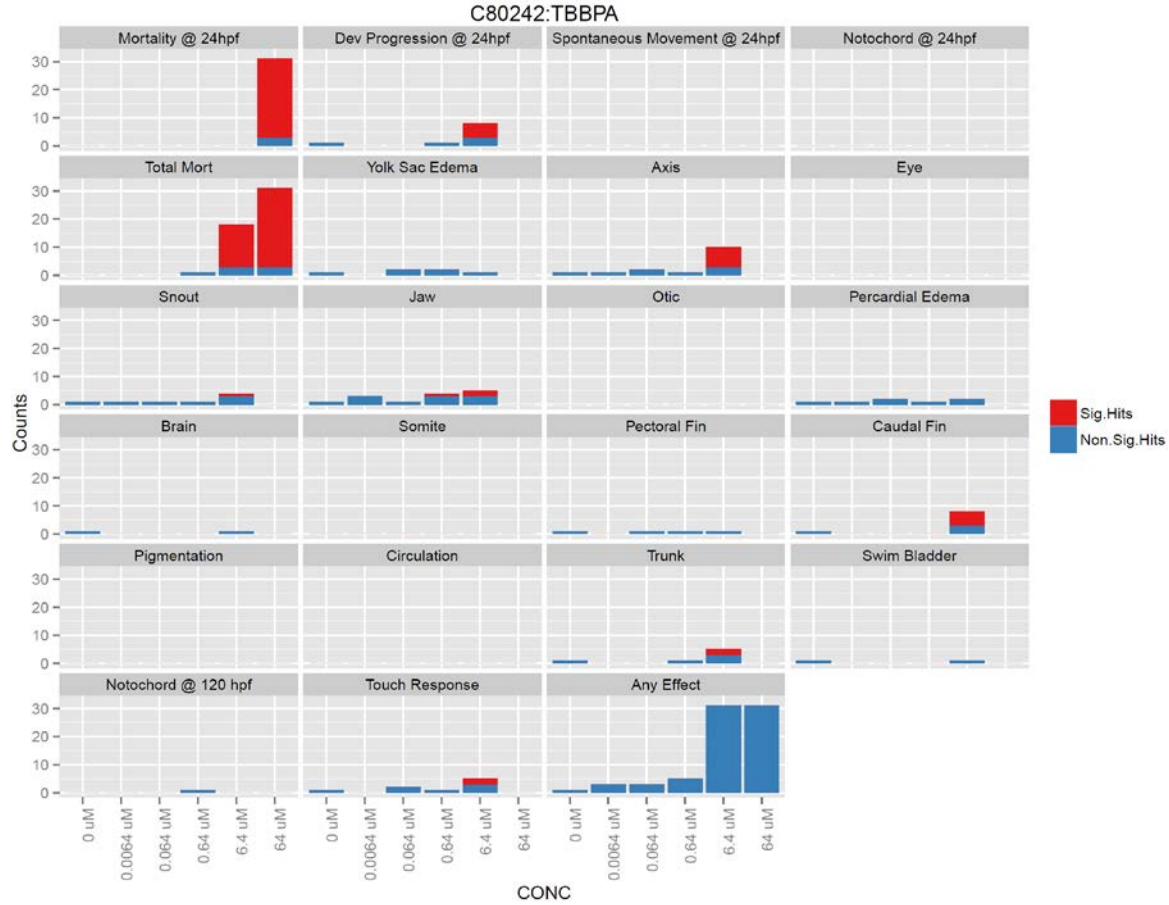

**TBBPA: Zebrafish embryo PRAT results at 24 hpf**

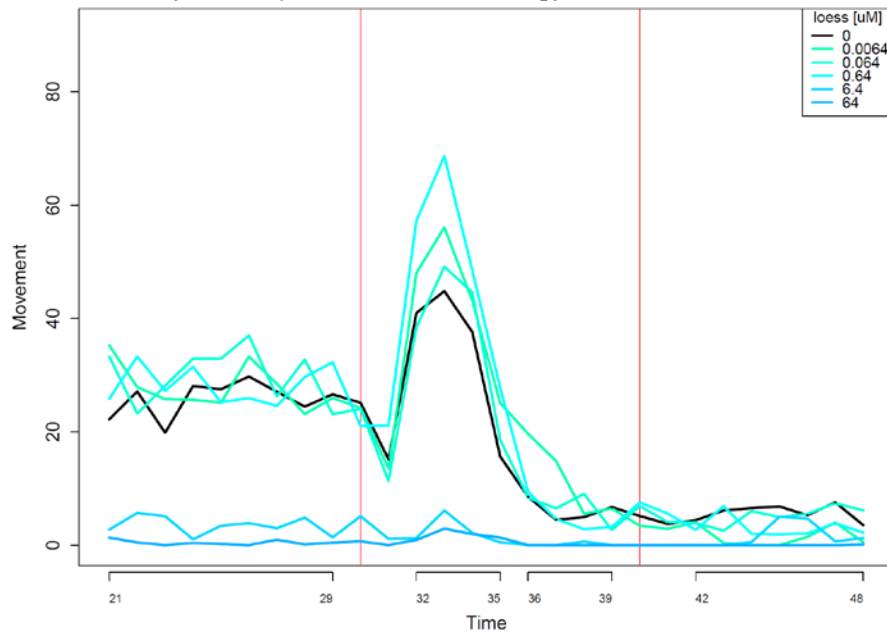

**TBBPA: Zebrafish larvae PMR assay results at 120 hpf**

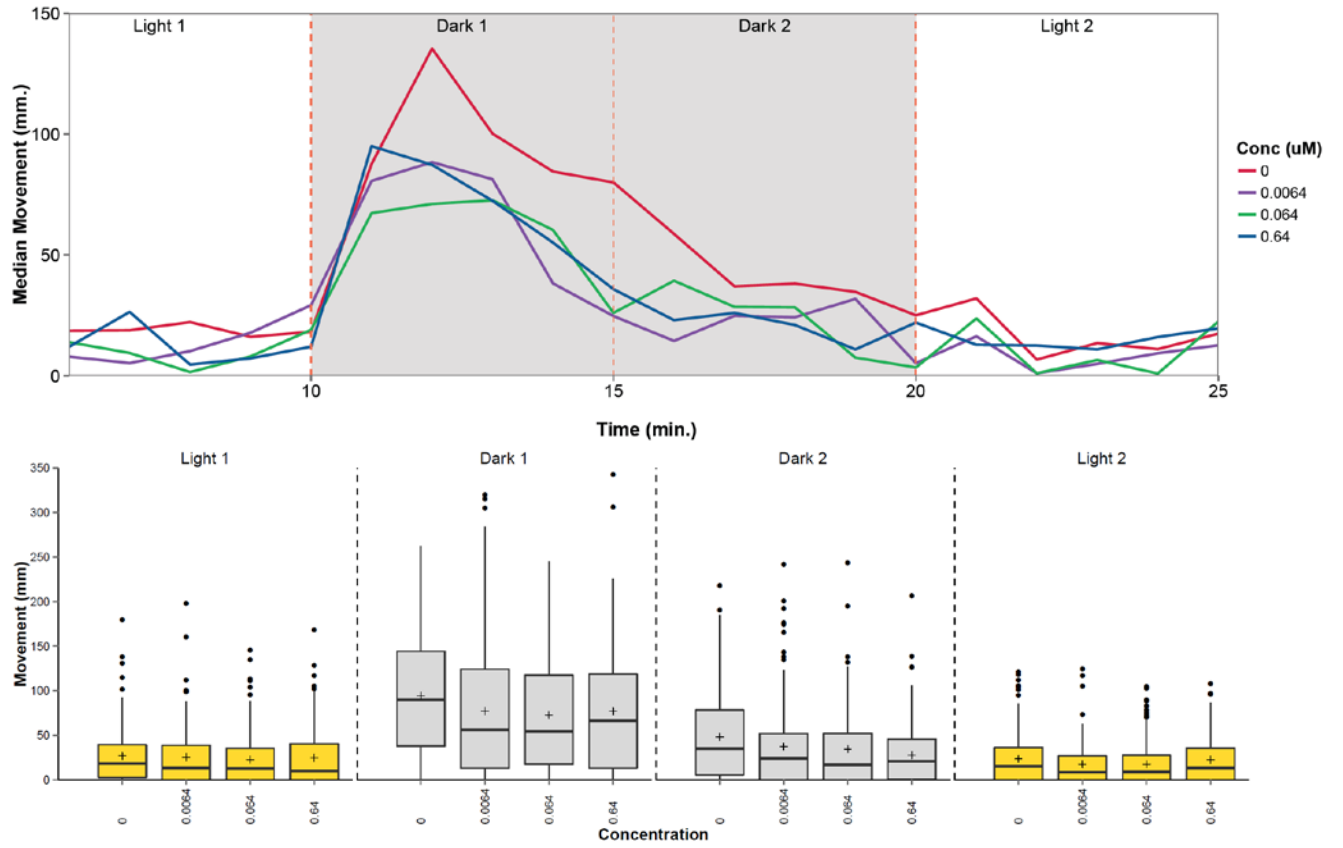

**Tetrabromobisphenol A-2,3-dibromopropyl ether (TBBPA-DBPE)**

***TBBPA-DBPE: Zebrafish Mortality and Malformations at 24 and 120 hpf***

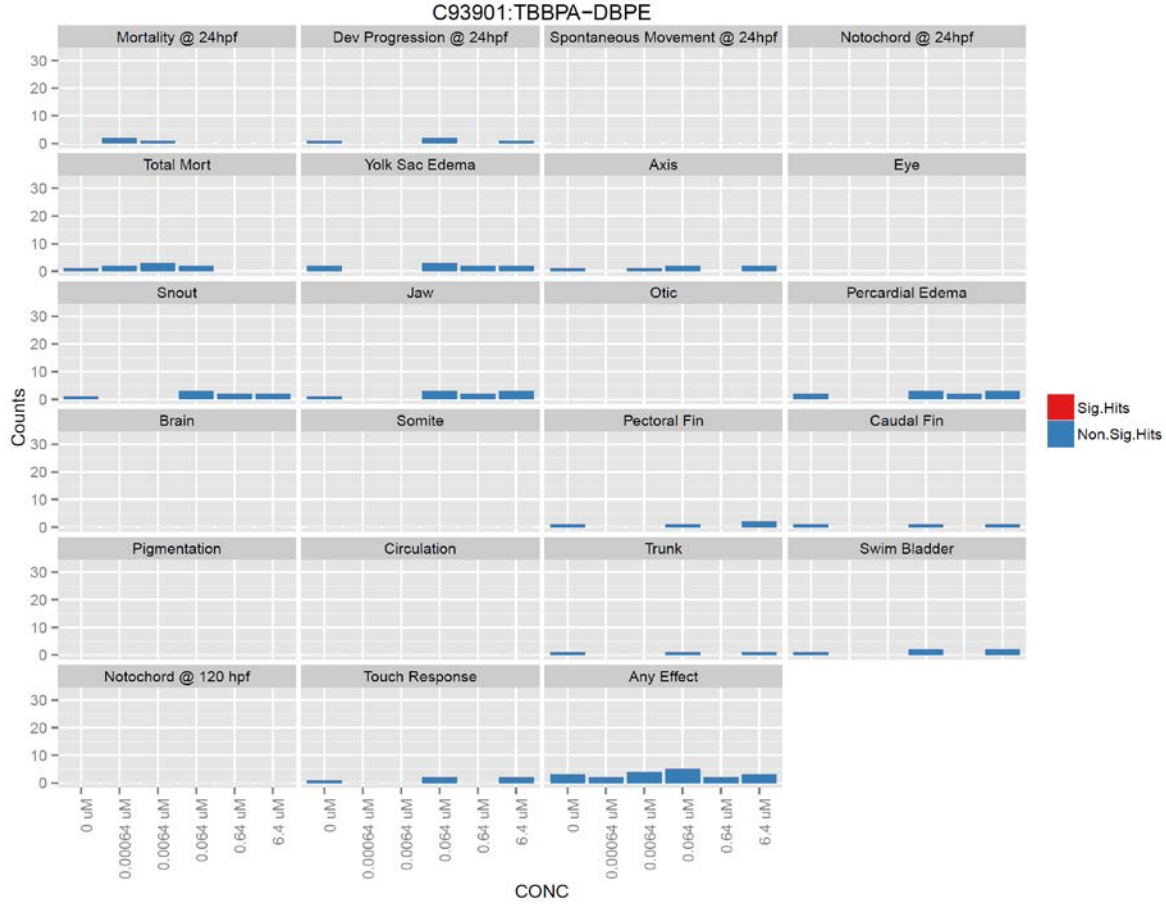

***TBBPA-DBPE: Zebrafish embryo PRAT results at 24 hpf***

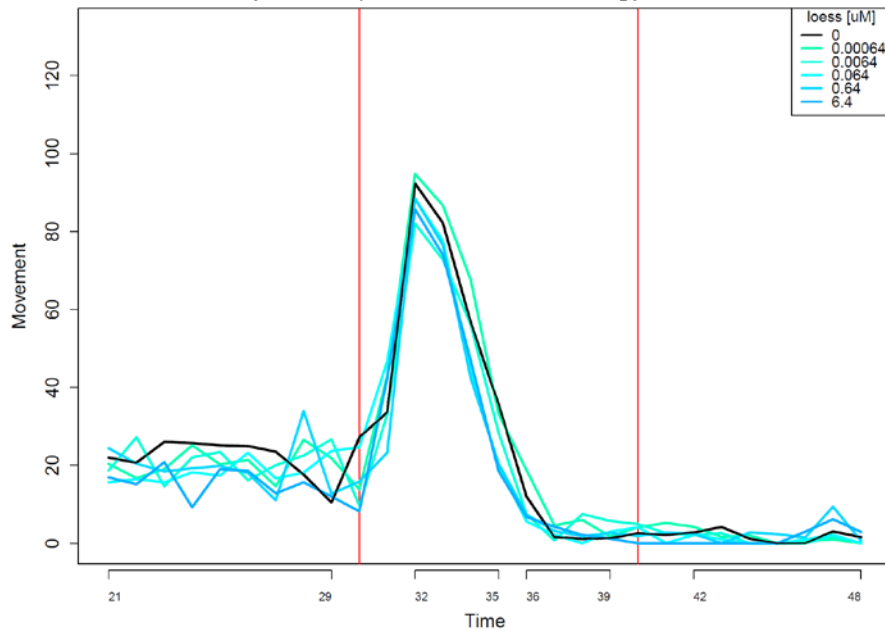

**TBBPA-DBPE: Zebrafish larvae PMR assay results at 120 hpf**

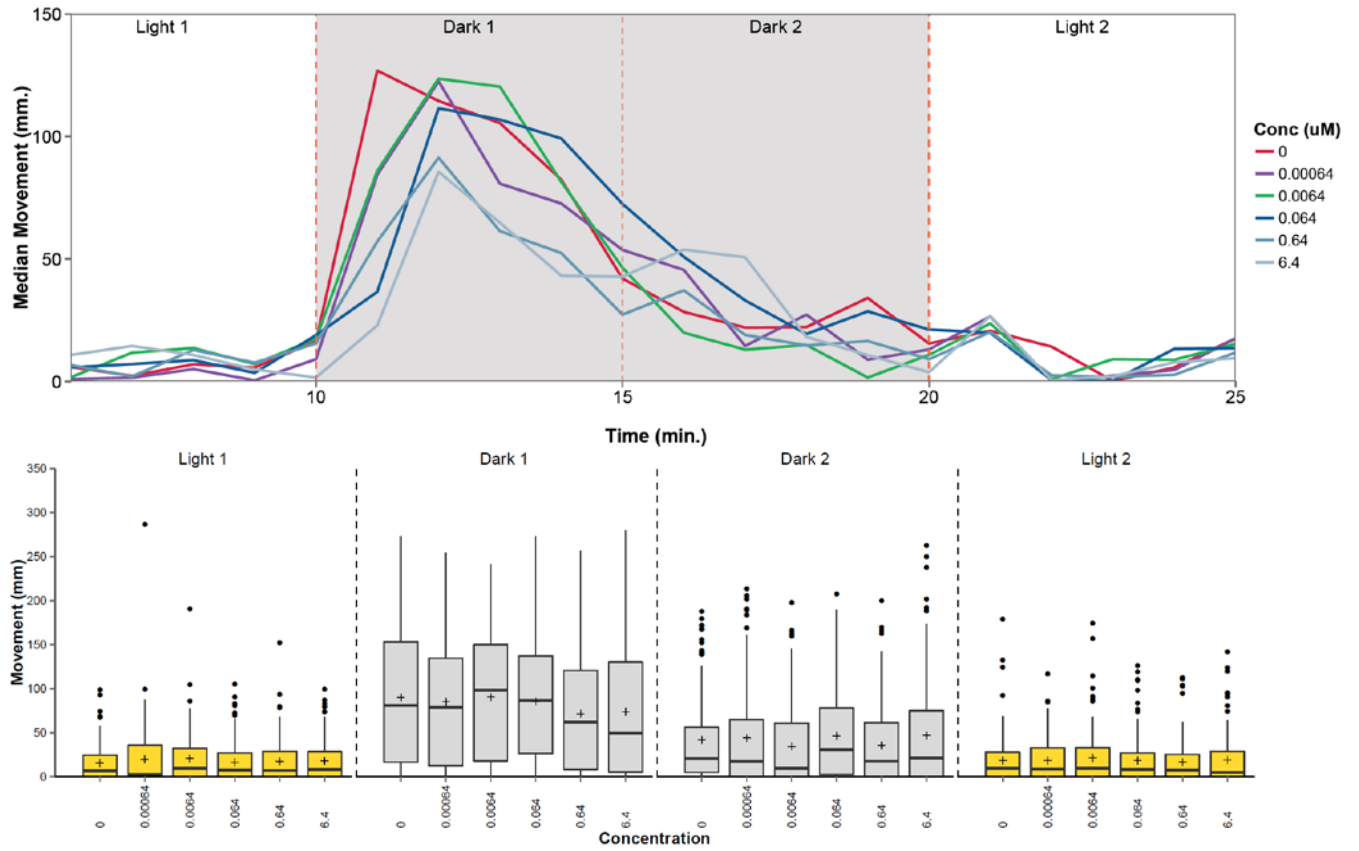



**Bis(2-ethylhexyl)-tetrabromophthalate (TBPH)**

***TBPH: Zebrafish Mortality and Malformations at 24 and 120 hpf***

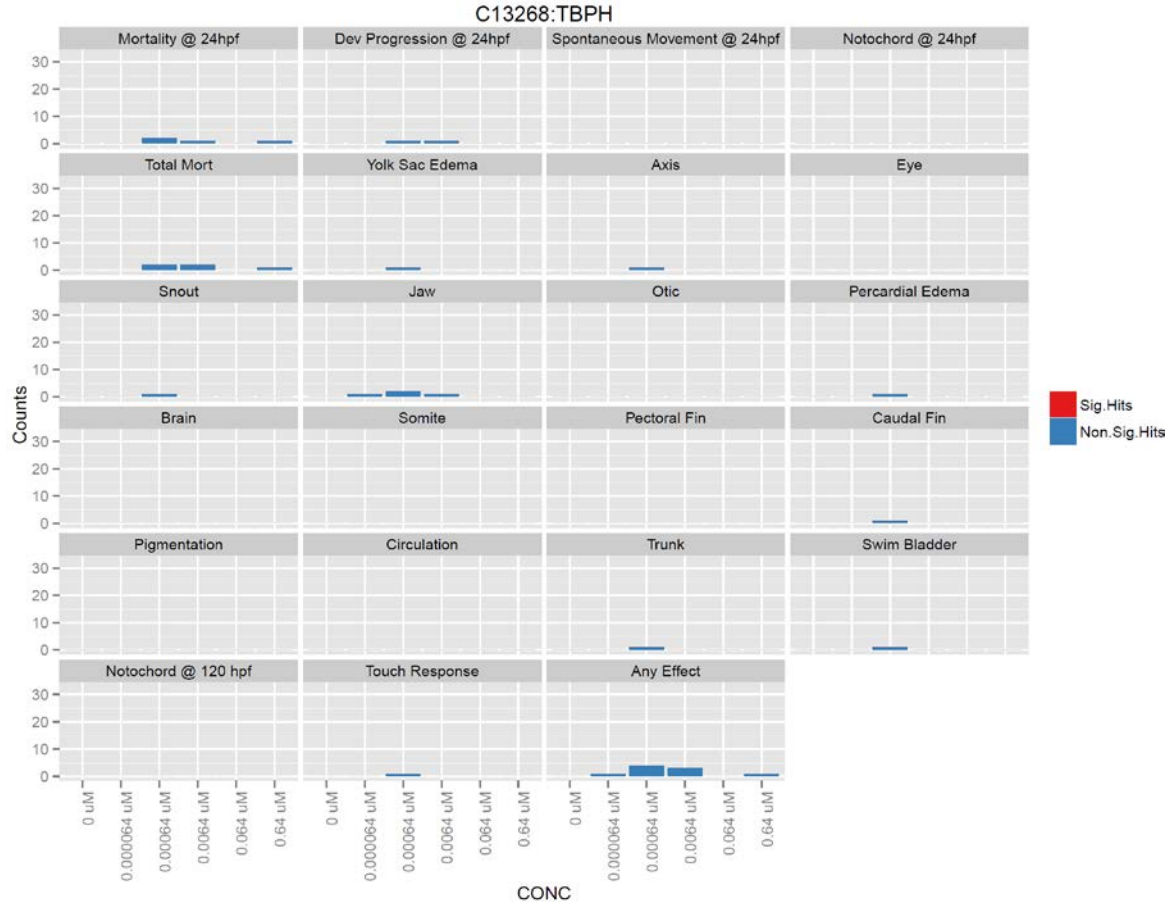

***TBPH: Zebrafish embryo PRAT results at 24 hpf***

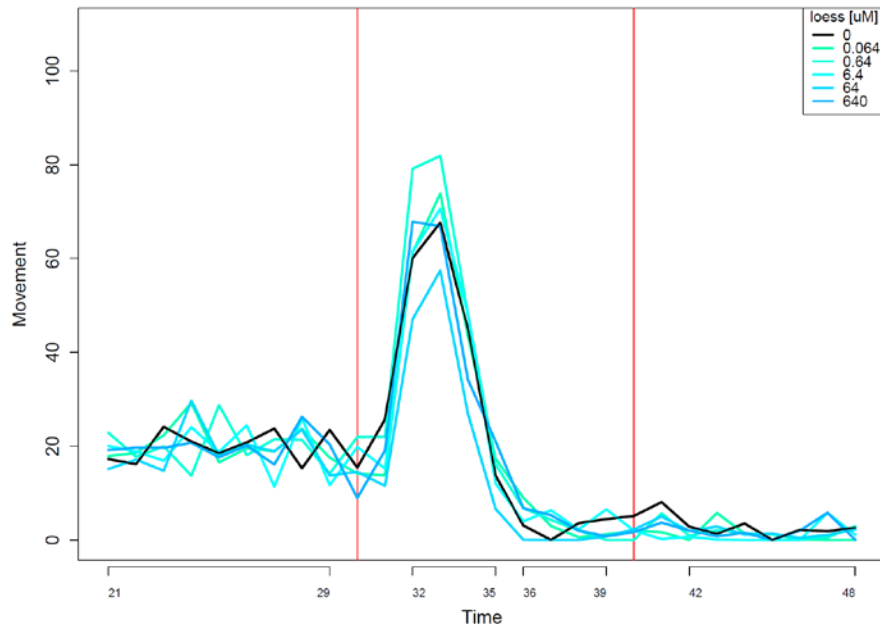

**TBPH: Zebrafish larvae PMR assay results at 120 hpf**

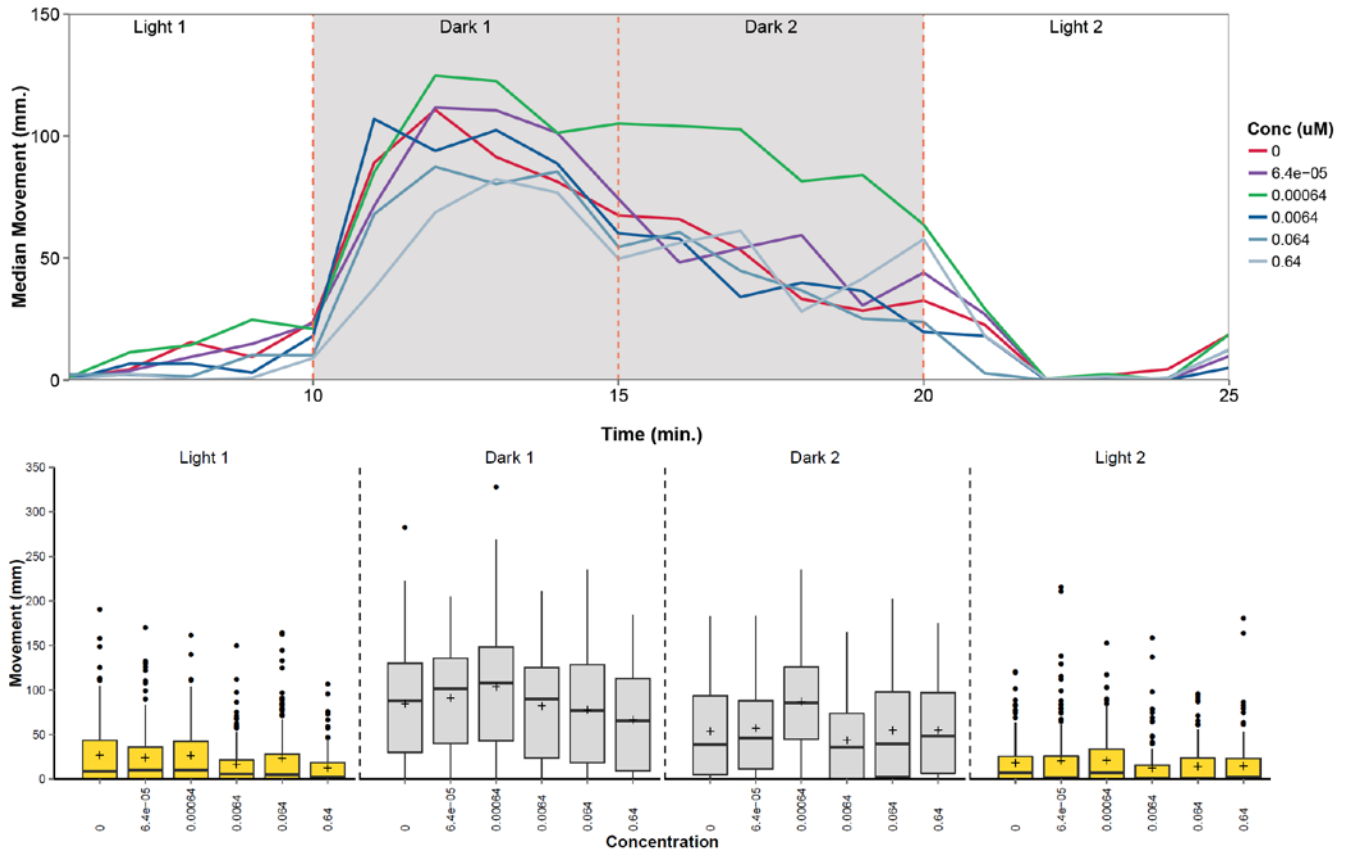

Supplement: supp_kfv044_Noyes_FR_paper_supplement.pdf [file supp_kfv044_Noyes_FR_paper_supplement.pdf]
